# Supplementary material for: Functional Orderly Topography of Brain Networks Associated with Gene Expression Heterogeneity
Source: Research Square preprint supplement (doi:10.21203/rs.3.rs-944509/v1), 2021-10-11
Supplement: Supplementary file 1 [file 473be014b150e6984592ad51.xlsx]

## Sheet: Sheet1
Brain #	structure acronym	structure_name	expression percentage	HKG percentage	specific gene percentage	average expression level	expression specificity
1	PCLa-i	paracentral lobule, anterior part, right, inferior bank of gyrus	73.1151	28.9009	0.0234357	3.1529	86.5403
1	Cl	claustrum, right	57.6936	36.6261	0	3.58084	94.6722
1	Cl	claustrum, right	37.2276	56.6418	0	3.9867	96.9687
1	LGd	dorsal lateral geniculate nucleus, left	38.7663	54.482	0.0442008	3.92934	96.9522
1	CA4	CA4 field, right	44.6779	47.2962	0	3.86254	97.6399
1	DG	dentate gyrus, right	63.2796	33.3929	0.00541565	3.3709	90.4965
1	Dt	dentate nucleus, left	59.462	35.5369	0	3.52427	93.7101
1	Fas	fastigial nucleus, left	44.8595	47.097	0.0152788	3.87551	98.016
1	Emb	emboliform nucleus, right	49.0404	43.0887	0	3.77599	96.9814
1	S	subiculum, left	59.0576	35.7802	0	3.54675	94.2121
1	CA1	CA1 field, left	40.6408	51.9605	0	3.97201	98.2642
1	TCd	tail of caudate nucleus, left	60.2776	35.056	0.00568537	3.50827	93.5547
1	DTA	anterior group of nuclei, right	58.9068	35.8718	0.00581767	3.541	94.0731
1	DTLv	lateral group of nuclei, right, ventral division	63.9411	33.0475	0	3.40561	91.7696
1	ILr	rostral group of intralaminar nuclei, right	53.4955	39.5003	0.00640615	3.61478	93.996
1	DTA	anterior group of nuclei, left	54.6676	38.6535	0	3.63566	95.3089
1	DTM	medial group of nuclei, left	57.7896	36.5653	0.00593014	3.56273	94.3009
1	DTLv	lateral group of nuclei, left, ventral division	55.0891	38.3577	0.00622084	3.6405	95.5208
1	ILr	rostral group of intralaminar nuclei, left	59.7258	35.3798	0	3.52106	93.8095
1	ILc	caudal group of intralaminar nuclei, left	54.2495	38.9514	0	3.63866	95.1818
1	Cl	claustrum, left	37.9541	55.5666	0	3.95721	97.2053
1	DTM	medial group of nuclei, right	61.7478	34.2213	0	3.46595	92.6967
1	DTLv	lateral group of nuclei, right, ventral division	59.0918	35.7594	0	3.53458	93.8851
1	R	reticular nucleus of thalamus, right	45.5517	46.3888	0	3.84922	97.4795
1	Pa	paraventricular nuclei, right of thalamus, right	60.6888	34.8185	0	3.40687	90.701
1	SI	substantia innominata, right	55.3873	38.1512	0.00618735	3.62138	95.1459
1	Sb	subthalamic nucleus, right	59.4106	35.5676	0	3.52881	93.877
1	SNC	substantia nigra, pars compacta, left	62.1316	34.0099	0.00551572	3.45143	92.4374
1	DTLv	lateral group of nuclei, left, ventral division	59.3934	35.5779	0	3.52268	93.5516
1	DTA	anterior group of nuclei, right	55.4901	38.0805	0	3.62407	95.2151
1	DTM	medial group of nuclei, right	56.0829	37.678	0	3.61456	95.1693
1	DTLv	lateral group of nuclei, right, ventral division	43.4613	48.6201	0.00788519	3.88594	97.5941
1	R	reticular nucleus of thalamus, left	61.268	34.4893	0.0111869	3.47874	92.9629
1	ZI	zona incerta, left	50.5312	41.8176	0.00678196	3.7236	96.1415
1	R	reticular nucleus of thalamus, right	45.8362	46.1009	0	3.85138	97.7583
1	ZI	zona incerta, right (丘脑腹侧)	25.353	79.17	0	4.30096	99.532
1	Sb	subthalamic nucleus, left	48.8005	43.3006	0	3.7922	97.2333
1	CGMB	central gray substance of midbrain, right	54.9417	38.4606	0	3.65127	95.6266
1	RN	red nucleus, left	42.3201	49.9312	0	3.90214	97.7036
1	RN	red nucleus, right	46.8746	45.0797	0	3.82844	97.5177
1	SNC	substantia nigra, pars compacta, left	59.767	35.3555	0	3.51403	93.5355
1	SNR	substantia nigra, pars reticulata, left	42.5908	49.5816	0	3.89357	97.7299
1	MTG-i	middle temporal gyrus, left, inferior bank of gyrus	72.2687	29.2394	0.0142261	3.17473	87.0286
1	ATZ	amygdalohippocampal transition zone, left	59.4688	35.5328	0.00576269	3.52513	93.6398
1	BLA	basolateral nucleus, left	58.6326	36.0395	0.0175346	3.55455	94.2387
1	BMA	basomedial nucleus, left	49.3729	42.7986	0.0138821	3.75951	96.6685
1	LA	lateral nucleus, left	64.3729	32.8258	0.00532368	3.39822	91.5487
1	LA	lateral nucleus, left	61.7032	34.246	0	3.48385	93.2962
1	SI	substantia innominata, left	59.1844	35.7035	0.0115808	3.52658	93.6452
1	CeA	central nucleus, left	55.9013	37.8004	0	3.614	94.9538
1	SIG	short insular gyri, left	70.3873	30.0209	0	3.24161	88.6858
1	PoG-cs	postcentral gyrus, right, bank of the central sulcus	73.3413	28.8117	0	3.14367	86.2766
1	OTG-i	occipito-temporal gyrus, left, inferior bank of gyrus	70.4935	29.9757	0	3.23741	88.6053
1	FuG-its	fusiform gyrus, left, bank of the its	75.4832	27.9942	0.00908018	3.06914	84.3398
1	FuG-l	fusiform gyrus, left, lateral bank of gyrus	72.7347	29.052	0.00471165	3.16377	86.7904
1	FuG-cos	fusiform gyrus, left, bank of cos	71.5079	29.5505	0	3.19886	87.5811
1	FuG-cos	fusiform gyrus, right, bank of cos	80.0446	26.3989	0.00856274	2.91849	80.2823
1	FuG-l	fusiform gyrus, right, lateral bank of gyrus	70.8259	29.835	0	3.22776	88.4015
1	HG	Heschl's gyrus, left	70.7676	29.8596	0	3.22722	88.3493
1	Pu	putamen, left	66.34	31.8473	0.0103316	3.34252	90.5629
1	HG	Heschl's gyrus, right	71.4942	29.5561	0	3.20176	87.6903
1	LIG	long insular gyri, right	70.1371	30.128	0	3.24498	88.7417
1	STG-i	superior temporal gyrus, left, inferior bank of gyrus	74.6059	28.3234	0.00918695	3.09748	85.019
1	MTG-s	middle temporal gyrus, left, superior bank of gyrus	71.9294	29.3773	0.0142932	3.18991	87.4472
1	MTG-i	middle temporal gyrus, left, inferior bank of gyrus	69.8903	30.2344	0	3.24189	88.4567
1	ITG-l	inferior temporal gyrus, left, lateral bank of gyrus	70.3598	30.0326	0.0243534	3.23262	88.3344
1	ITG-mts	inferior temporal gyrus, left, bank of mts	71.6381	29.4967	0	3.19543	87.5447
1	STG-l	superior temporal gyrus, right, lateral bank of gyrus	71.2543	29.6556	0	3.20982	87.9022
1	STG-i	superior temporal gyrus, right, inferior bank of gyrus	68.5846	30.8	0.0099935	3.29267	89.834
1	MTG-s	middle temporal gyrus, right, superior bank of gyrus	71.1995	29.6785	0	3.21178	87.9703
1	MTG-i	middle temporal gyrus, right, inferior bank of gyrus	70.209	30.0971	0.0146434	3.2455	88.7789
1	ITG-its	inferior temporal gyrus, right, bank of the its （颞下回皮层）	83.3071	25.3651	0.0863878	2.80018	76.9243
1	ITG-l	inferior temporal gyrus, right, lateral bank of gyrus	69.0987	30.5808	0.00495958	3.26953	89.1653
1	ITG-mts	inferior temporal gyrus, right, bank of mts	74.4894	28.3677	0	3.1011	85.1151
1	FuG-its	fusiform gyrus, right, bank of the its	73.0398	28.9307	0	3.15503	86.5918
1	PoG-il	postcentral gyrus, right, inferior lateral aspect of gyrus	72.7073	29.063	0	3.16591	86.825
1	PLT	planum temporale, right	74.6025	28.3247	0.0229684	3.0987	85.0776
1	PrG-prc	precentral gyrus, left, bank of the precentral sulcus	70.3564	30.0341	0	3.23823	88.5763
1	PrG-sl	precentral gyrus, left, superior lateral aspect of gyrus	69.3009	30.4915	0.00494511	3.27363	89.3912
1	PrG-il	precentral gyrus, left, inferior lateral aspect of gyrus	66.8163	31.6254	0.0564189	3.289	88.7683
1	MFG-i	middle frontal gyrus, left, inferior bank of gyrus	70.2776	30.0678	0	3.24218	88.6862
1	SFG-m	superior frontal gyrus, left, medial bank of gyrus	69.9212	30.221	0	3.24453	88.5626
1	SFG-l	superior frontal gyrus, left, lateral bank of gyrus	75.7882	27.8815	0.00452182	3.0652	84.2692
1	MFG-s	middle frontal gyrus, left, superior bank of gyrus	72.0562	29.3256	0	3.18718	87.3968
1	SFG-m	superior frontal gyrus, right, medial bank of gyrus	71.4942	29.5561	0	3.20267	87.7135
1	PrG-prc	precentral gyrus, right, bank of the precentral sulcus	72.231	29.2546	0.00474451	3.17884	87.1658
1	PrG-sl	precentral gyrus, right, superior lateral aspect of gyrus	66.8403	31.614	0	3.34432	90.8242
1	PrG-il	precentral gyrus, right, inferior lateral aspect of gyrus	66.9328	31.5703	0.0102401	3.34234	90.8061
1	PrG-cs	precentral gyrus, right, bank of the central sulcus	70.3975	30.0166	0.00973615	3.22104	87.8814
1	SFG-l	superior frontal gyrus, right, lateral bank of gyrus	73.8143	28.6271	0.00464274	3.1286	85.8925
1	MFG-s	middle frontal gyrus, right, superior bank of gyrus	72.392	29.1895	0.0094679	3.17399	87.0283
1	MFG-i	middle frontal gyrus, right, inferior bank of gyrus	71.3639	29.6101	0.00480215	3.20503	87.7657
1	PoG-cs	postcentral gyrus, right, bank of the central sulcus	72.3955	29.1882	0.00473373	3.17306	86.9996
1	PrG-cs	precentral gyrus, left, bank of the central sulcus	71.9225	29.3801	0.00476485	3.18544	87.2817
1	PoG-cs	postcentral gyrus, left, bank of the central sulcus	65.1508	32.4339	0	3.39654	91.9234
1	SFG-m	superior frontal gyrus, left, medial bank of gyrus	72.1487	29.288	0.00474992	3.18193	87.2584
1	MFG-s	middle frontal gyrus, right, superior bank of gyrus	72.9541	28.9647	0.00469748	3.15504	86.5696
1	MFG-s	middle frontal gyrus, left, superior bank of gyrus	72.5291	29.1344	0.004725	3.16659	86.79
1	ITG-its	inferior temporal gyrus, right, bank of the its	69.9109	30.2255	0.00490196	3.2528	88.9256
1	MTG-s	middle temporal gyrus, right, superior bank of gyrus	68.965	30.6251	0.0198768	3.27157	89.2779
1	ITG-l	inferior temporal gyrus, left, lateral bank of gyrus	70.2947	30.0605	0	3.24217	88.6898
1	MTG-s	middle temporal gyrus, left, superior bank of gyrus	71.9465	29.3703	0	3.18999	87.4768
1	Pu	putamen, left	71.3605	29.6115	0	3.19616	87.4174
1	PrG-cs	precentral gyrus, right, bank of the central sulcus	74.3215	28.4318	0.0138332	3.11209	85.4852
1	GPi	globus pallidus, internal segment, right	68.3105	30.9336	0.00501681	3.26388	88.6675
1	ITG-its	inferior temporal gyrus, left, bank of the its	71.6313	29.4996	0	3.19985	87.6619
1	FuG-l	fusiform gyrus, left, lateral bank of gyrus	68.6875	30.7639	0	3.28955	89.7099
1	PHG-l	parahippocampal gyrus, left, lateral bank of gyrus	67.6765	31.2234	0	3.3203	90.3291
1	PHG-cos	parahippocampal gyrus, left, bank of the cos	69.6436	30.3415	0	3.25874	88.9356
1	CgGp-s	cingulate gyrus, parietal part, left, superior bank of gyrus	67.7039	31.2108	0	3.32242	90.4708
1	CgGp-i	cingulate gyrus, parietal part, left, inferior bank of gyrus	70.4421	29.9976	0	3.23249	88.3614
1	CgGp-s	cingulate gyrus, parietal part, right, superior bank of gyrus	69.2084	30.5323	0	3.27155	89.276
1	CgGp-i	cingulate gyrus, parietal part, right, inferior bank of gyrus	70.6511	29.9088	0.0097012	3.22949	88.3865
1	cc	corpus callosum	66.3194	31.8623	0	3.32264	89.9505
1	cgb	cingulum bundle, right	68.2625	30.9554	0	3.268	88.7414
1	PLT	planum temporale, left	75.0788	28.145	0.0136936	3.07348	84.2936
1	LIG	long insular gyri, left	71.4256	29.5845	0	3.20524	87.7997
1	STG-i	superior temporal gyrus, right, inferior bank of gyrus	75.0308	28.163	0.00456746	3.08916	84.9002
1	MTG-s	middle temporal gyrus, right, superior bank of gyrus	72.8136	29.0206	0	3.15985	86.6812
1	MTG-i	middle temporal gyrus, right, inferior bank of gyrus	71.2029	29.677	0.00481301	3.21365	88.0335
1	ITG-its	inferior temporal gyrus, right, bank of the its	71.7889	29.4348	0	3.19386	87.5593
1	ITG-l	inferior temporal gyrus, right, lateral bank of gyrus	71.0487	29.7415	0.00964692	3.21736	88.1066
1	ITG-mts	inferior temporal gyrus, right, bank of mts	73.1528	28.886	0.00936944	3.15026	86.4561
1	STG-i	superior temporal gyrus, left, inferior bank of gyrus	71.5284	29.542	0.0143733	3.20301	87.7853
1	MTG-s	middle temporal gyrus, left, superior bank of gyrus	68.9993	30.6248	0	3.28421	89.6405
1	MTG-i	middle temporal gyrus, left, inferior bank of gyrus	68.499	30.8485	0.025015	3.29411	89.8193
1	PLP	planum polare, left	71.9054	29.3871	0	3.1944	87.5966
1	Cl	claustrum, right	62.8855	33.6022	0.00544959	3.44782	92.6059
1	Cl	claustrum, left	50.0617	42.2097	0.00684556	3.7512	96.4252
1	SMG-s	supramarginal gyrus, left, superior bank of gyrus	71.6929	29.4742	0.00478011	3.19702	87.5725
1	GPi	globus pallidus, internal segment, left	67.8718	31.1336	0	3.28608	89.2857
1	PHG-cos	parahippocampal gyrus, right, bank of the cos	80.3838	26.2875	0.042633	2.90504	79.8965
1	Cl	claustrum, right	52.6011	40.172	0.0130302	3.68993	95.8085
1	MFG-i	middle frontal gyrus, left, inferior bank of gyrus	74.366	28.4147	0	3.11016	85.4362
1	ITG-mts	inferior temporal gyrus, right, bank of mts	71.2851	29.6428	0.00480746	3.21287	88.0126
1	MTG-i	middle temporal gyrus, right, inferior bank of gyrus	73.2042	28.8657	0.00468143	3.14632	86.3407
1	ITG-mts	inferior temporal gyrus, left, bank of mts	69.7327	30.3027	0.00491449	3.26054	89.1087
1	BCd	body of caudate nucleus, right	70.6717	29.9001	0	3.21687	87.9123
1	Pu	putamen, left	70.6751	29.8987	0.00969791	3.21186	87.7224
1	MFG-i	middle frontal gyrus, right, inferior bank of gyrus	71.9602	29.3647	0	3.19275	87.5534
1	MFG-s	middle frontal gyrus, right, superior bank of gyrus	71.9088	29.3857	0.00476576	3.19392	87.5821
1	HG	Heschl's gyrus, right	72.8376	29.011	0.004705	3.15852	86.6609
1	SMG-i	supramarginal gyrus, left, inferior bank of gyrus	72.3201	29.2186	0	3.17705	87.1369
1	SFG-m	superior frontal gyrus, right, medial bank of gyrus	71.5284	29.542	0.00958222	3.19797	87.5892
1	Cl	claustrum, right	51.806	40.7885	0.0132301	3.70157	95.7036
1	Cl	claustrum, left	54.5888	38.7093	0.0125557	3.64951	95.437
1	Cl	claustrum, left	52.3029	40.401	0	3.70892	96.1715
1	Cl	claustrum, left	56.5559	37.3629	0.0060595	3.59618	94.671
1	MFG-i	middle frontal gyrus, right, inferior bank of gyrus	72.1967	29.2685	0.00949352	3.18271	87.2888
1	SFG-m	superior frontal gyrus, left, medial bank of gyrus	71.5422	29.5363	0	3.20024	87.6948
1	SFG-m	superior frontal gyrus, right, medial bank of gyrus	72.8855	28.9919	0.0047019	3.15942	86.7051
1	CgGf-s	cingulate gyrus, frontal part, left, superior bank of gyrus	74.0096	28.5516	0	3.11902	85.6313
1	CgGf-i	cingulate gyrus, frontal part, left, inferior bank of gyrus	71.7341	29.4573	0.00477737	3.18882	87.3363
1	CgGf-s	cingulate gyrus, frontal part, right, superior bank of gyrus	71.3674	29.6086	0	3.20908	87.9386
1	CgGf-i	cingulate gyrus, frontal part, right, inferior bank of gyrus	70.8944	29.8062	0	3.22629	88.3321
1	SFG-l	superior frontal gyrus, left, lateral bank of gyrus	71.0384	29.7458	0.00482416	3.21377	87.9713
1	MFG-s	middle frontal gyrus, left, superior bank of gyrus	73.2214	28.8589	0.00468033	3.14925	86.4614
1	PrG-prc	precentral gyrus, left, bank of the precentral sulcus	71.0007	29.7616	0.00965344	3.21653	88.0278
1	PrG-sl	precentral gyrus, left, superior lateral aspect of gyrus	70.6888	29.8929	0.0193921	3.22965	88.4266
1	MFG-i	middle frontal gyrus, left, inferior bank of gyrus	72.4435	29.1688	0.00473059	3.17531	87.1078
1	PrG-prc	precentral gyrus, right, bank of the precentral sulcus	71.6724	29.4826	0.0143445	3.19906	87.6848
1	PrG-il	precentral gyrus, right, inferior lateral aspect of gyrus	72.6182	29.0986	0	3.17118	87.0313
1	PoG-cs	postcentral gyrus, right, bank of the central sulcus	71.8574	29.4067	0	3.1939	87.56
1	PoG-sl	postcentral gyrus, right, superior lateral aspect of gyrus	74.8355	28.2365	0.0183175	3.09579	85.0662
1	PoG-il	postcentral gyrus, right, inferior lateral aspect of gyrus	75.1371	28.1231	0	3.08544	84.8055
1	BCd	body of caudate nucleus, right	71.7204	29.4629	0.00477829	3.18157	87.0193
1	Pu	putamen, right	66.6415	31.7083	0	3.33153	90.3503
1	GPe	globus pallidus, external segment, right	71.5147	29.5476	0.0191681	3.17887	86.7985
1	PrG-il	precentral gyrus, left, inferior lateral aspect of gyrus	72.6525	29.0849	0.00943396	3.16343	86.742
1	STG-l	superior temporal gyrus, left, lateral bank of gyrus	70.586	29.9364	0.0145652	3.22957	88.3111
1	HG	Heschl's gyrus, left	69.5785	30.3699	0	3.26387	89.1711
1	ITG-l	inferior temporal gyrus, left, lateral bank of gyrus	71.5696	29.525	0.0143651	3.19981	87.6899
1	TG	transverse gyri, right	73.8382	28.6178	0	3.12492	85.8022
1	SIG	short insular gyri, right	72.2104	29.263	0.00474586	3.17881	87.158
1	BCd	body of caudate nucleus, left	74.1981	28.4791	0	3.10092	85.0209
1	Pu	putamen, left	68.5812	30.8115	0.029982	3.27128	89.0084
1	PHG-l	parahippocampal gyrus, right, lateral bank of gyrus	70.7916	29.8494	0	3.22992	88.4198
1	GPe	globus pallidus, external segment, left	68.2282	30.9709	0.00502285	3.27835	89.1086
1	PLP	planum polare, right	68.5709	30.8161	0.0449798	3.29131	89.6995
1	FuG-its	fusiform gyrus, right, bank of the its	66.7786	31.6432	0.0102638	3.34501	90.8478
1	ITG-mts	inferior temporal gyrus, left, bank of mts	64.9349	32.5417	0.026388	3.38843	91.4958
1	LIG	long insular gyri, right	66.0898	31.973	0.00518538	3.35259	90.7981
1	SFG-l	superior frontal gyrus, left, lateral bank of gyrus	67.1213	31.4817	0.0153171	3.33901	90.8321
1	SFG-m	superior frontal gyrus, right, medial bank of gyrus	75.8773	27.8488	0	3.06035	84.1295
1	CgGp-i	cingulate gyrus, parietal part, left, inferior bank of gyrus	67.9678	31.0896	0	3.31219	90.1791
1	MTG-i	middle temporal gyrus, left, inferior bank of gyrus	70.5003	29.9728	0	3.23573	88.4995
1	ITG-its	inferior temporal gyrus, left, bank of the its	65.7574	32.1347	0	3.36956	91.2621
1	ITG-mts	inferior temporal gyrus, left, bank of mts	69.4722	30.4163	0	3.26584	89.175
1	FuG-cos	fusiform gyrus, left, bank of cos	67.159	31.464	0	3.335	90.6775
1	ITG-its	inferior temporal gyrus, right, bank of the its	70.6408	29.9132	0.00485131	3.22667	88.2655
1	ITG-l	inferior temporal gyrus, right, lateral bank of gyrus	65.3461	32.3369	0	3.38197	91.5229
1	FuG-its	fusiform gyrus, right, bank of the its	67.392	31.3552	0	3.32975	90.5788
1	FuG-l	fusiform gyrus, right, lateral bank of gyrus	65.538	32.2422	0.0313742	3.36802	91.0248
1	PHG-l	parahippocampal gyrus, right, lateral bank of gyrus	66.2577	31.892	0.0362056	3.35554	90.9348
1	PHG-cos	parahippocampal gyrus, right, bank of the cos	60.7608	34.7772	0	3.5048	93.4833
1	SMG-i	supramarginal gyrus, left, inferior bank of gyrus	66.4531	31.7983	0.00515703	3.35714	91.1137
1	STG-i	superior temporal gyrus, left, inferior bank of gyrus	68.5058	30.8454	0	3.29543	89.8126
1	TG	transverse gyri, left	71.3263	29.6257	0.00960938	3.19918	87.45
1	PLT	planum temporale, left	68.3139	30.9321	0.00501655	3.29915	89.868
1	MTG-s	middle temporal gyrus, right, superior bank of gyrus	70.1097	30.1398	0	3.2476	88.7845
1	MTG-i	middle temporal gyrus, right, inferior bank of gyrus	68.3071	30.9352	0	3.30612	90.1369
1	ITG-mts	inferior temporal gyrus, right, bank of mts	66.477	31.7868	0.0103103	3.35195	90.9304
1	PrG-il	precentral gyrus, left, inferior lateral aspect of gyrus	68.9445	30.6492	0.00994135	3.27611	89.2616
1	PrG-cs	precentral gyrus, left, bank of the central sulcus	68.0089	31.0708	0.00503905	3.31041	90.1132
1	PoG-cs	postcentral gyrus, left, bank of the central sulcus	65.4935	32.2641	0	3.38053	91.4854
1	PoG-pcs	postcentral gyrus, left, bank of the posterior central sulcus	76.5147	27.6168	0.0179155	3.03955	83.5771
1	PrG-sl	precentral gyrus, right, superior lateral aspect of gyrus	68.0295	31.0614	0	3.3128	90.2237
1	PCLa-s	paracentral lobule, anterior part, right, superior bank of gyrus	63.0226	33.5291	0.00543774	3.44672	92.5952
1	PCLa-i	paracentral lobule, anterior part, left, inferior bank of gyrus	73.5538	28.7285	0	3.1383	86.1485
1	CgGp-s	cingulate gyrus, parietal part, right, superior bank of gyrus	67.0665	31.5074	0.0102197	3.33272	90.5653
1	PrG-il	precentral gyrus, right, inferior lateral aspect of gyrus	64.5236	32.7491	0	3.41454	92.2421
1	PrG-cs	precentral gyrus, right, bank of the central sulcus	65.1405	32.439	0.0157828	3.38752	91.5588
1	PoG-sl	postcentral gyrus, right, superior lateral aspect of gyrus	67.8033	31.165	0.0252717	3.31063	90.023
1	PoG-il	postcentral gyrus, right, inferior lateral aspect of gyrus	77.6628	27.2085	0.0220634	2.95852	80.9103
1	SMG-s	supramarginal gyrus, right, superior bank of gyrus	67.464	31.3218	0.0457178	3.31791	90.146
1	SMG-i	supramarginal gyrus, right, inferior bank of gyrus	78.1631	27.0344	0.0175377	2.93547	80.2432
1	PoG-cs	postcentral gyrus, left, bank of the central sulcus	71.8814	29.3969	0.0238379	3.18687	87.2598
1	AnG-i	angular gyrus, left, inferior bank of gyrus	66.1446	31.9465	0	3.36013	91.0404
1	SPL-i	superior parietal lobule, left, inferior bank of gyrus	75.1268	28.127	0.0182465	3.05904	83.7444
1	HCd	head of caudate nucleus, right	74.904	28.2106	0	3.08163	84.5321
1	PCLa-s	paracentral lobule, anterior part, left, superior bank of gyrus	71.5182	29.5462	0.00958359	3.19566	87.45
1	CgGp-s	cingulate gyrus, parietal part, left, superior bank of gyrus	68.8691	30.6827	0.00995223	3.28261	89.5495
1	ITG-l	inferior temporal gyrus, right, lateral bank of gyrus	62.4572	33.8326	0	3.46973	93.1286
1	MTG-s	middle temporal gyrus, left, superior bank of gyrus	75.2639	28.0758	0.0273199	3.04679	83.347
1	SMG-i	supramarginal gyrus, left, inferior bank of gyrus	70.2056	30.0986	0.00488138	3.24333	88.6832
1	ITG-its	inferior temporal gyrus, right, bank of the its	65.3873	32.3166	0	3.38192	91.5543
1	PCLa-i	paracentral lobule, anterior part, right, inferior bank of gyrus	67.5805	31.2677	0.010142	3.31188	89.9524
1	STG-i	superior temporal gyrus, left, inferior bank of gyrus	68.8759	30.6797	0.0248781	3.28114	89.4814
1	MTG-s	middle temporal gyrus, left, superior bank of gyrus	69.8561	30.2492	0	3.25522	88.961
1	MTG-i	middle temporal gyrus, left, inferior bank of gyrus	70.7437	29.8697	0.019377	3.22571	88.2687
1	ITG-l	inferior temporal gyrus, left, lateral bank of gyrus	71.7855	29.4362	0	3.17866	86.8772
1	HG	Heschl's gyrus, left	68.3036	30.9367	0	3.30196	89.9717
1	PLT	planum temporale, left	71.4873	29.559	0	3.20039	87.6012
1	MTG-i	middle temporal gyrus, left, inferior bank of gyrus	70.4695	29.9859	0.0145893	3.22695	88.144
1	AOrG	anterior orbital gyrus, right	69.5648	30.3759	0	3.26508	89.2341
1	LOrG	lateral orbital gyrus, right	69.2975	30.4931	0	3.27058	89.2719
1	orIFG	inferior frontal gyrus, orbital part, left	70.5792	29.9393	0.00485555	3.23092	88.4434
1	LOrG	lateral orbital gyrus, left	69.1947	30.5384	0	3.27797	89.5615
1	GRe	gyrus rectus, right	69.7704	30.2864	0	3.2587	89.0861
1	IRoG	inferior rostral gyrus, left	71.878	29.3983	0.00476781	3.19165	87.4762
1	SFG-m	superior frontal gyrus, left, medial bank of gyrus	69.1056	30.5777	0	3.27358	89.3399
1	SRoG	superior rostral gyrus, right	70.3598	30.0326	0.0243534	3.23371	88.4253
1	MFG-s	middle frontal gyrus, right, superior bank of gyrus	71.2234	29.6685	0	3.21462	88.0797
1	OTG-s	occipito-temporal gyrus, left, superior bank of gyrus	71.7855	29.4362	0.0190958	3.19043	87.4327
1	OTG-i	occipito-temporal gyrus, left, inferior bank of gyrus	72.3098	29.2227	0	3.1764	87.1106
1	LiG-pest	lingual gyrus, right, peristriate	68.6909	30.7623	0.0149671	3.27943	89.3961
1	LiG-str	lingual gyrus, right, striate	71.1103	29.7157	0.00481928	3.21154	87.8938
1	Cun-pest	cuneus, right, peristriate	64.5442	32.7387	0.0106191	3.39989	91.7887
1	LiG-str	lingual gyrus, right, striate	71.6724	29.4826	0.00478149	3.19054	87.3423
1	AnG-i	angular gyrus, left, inferior bank of gyrus	69.2186	30.5278	0	3.27	89.3155
1	SOG-s	superior occipital gyrus, left, superior bank of gyrus	69.5236	30.3938	0	3.26496	89.1769
1	AnG-s	angular gyrus, right, superior bank of gyrus	68.8143	30.7072	0	3.2801	89.4048
1	Pcu-i	precuneus, right, inferior lateral bank of gyrus	68.8588	30.6873	0.00497686	3.28103	89.5347
1	SPL-i	superior parietal lobule, right, inferior bank of gyrus	69.6436	30.3415	0	3.25952	89.04
1	AnG-i	angular gyrus, right, inferior bank of gyrus	73.9102	28.59	0.00463671	3.12913	85.9589
1	SOG-s	superior occipital gyrus, right, superior bank of gyrus	71.7375	29.4559	0.0191086	3.19878	87.693
1	SPL-i	superior parietal lobule, left, inferior bank of gyrus	70.4558	29.9917	0.00486405	3.23506	88.5398
1	AnG-s	angular gyrus, left, superior bank of gyrus	68.5127	30.8423	0	3.29134	89.7685
1	SPL-s	superior parietal lobule, right, superior bank of gyrus	67.6319	31.244	0	3.32354	90.5169
1	Pcu-s	precuneus, right, superior lateral bank of gyrus	72.6594	29.0822	0	3.16411	86.7519
1	LiG-str	lingual gyrus, right, striate	70.5483	29.9524	0	3.2229	88.1025
1	MTG-s	middle temporal gyrus, right, superior bank of gyrus	71.5661	29.5264	0.00478858	3.20245	87.7654
1	ITG-mts	inferior temporal gyrus, right, bank of mts	72.512	29.1413	0.0283567	3.1664	86.8079
1	SPL-s	superior parietal lobule, right, superior bank of gyrus	70.305	30.0561	0.0194979	3.23717	88.5502
1	Pcu-s	precuneus, right, superior lateral bank of gyrus	65.4352	32.2929	0.0104745	3.37371	91.2442
1	Cun-pest	cuneus, left, peristriate	69.5853	30.3669	0	3.26083	89.08
1	LiG-str	lingual gyrus, left, striate	67.5942	31.2614	0	3.31327	90.1407
1	Pcu-i	precuneus, left, inferior lateral bank of gyrus	68.194	30.9865	0	3.30452	90.0395
1	GRe	gyrus rectus, left	67.6833	31.2203	0.0151899	3.31106	90.0737
1	MOrG	medial orbital gyrus, left	70.4901	29.9772	0.00972337	3.23734	88.5895
1	GRe	gyrus rectus, left	65.1337	32.4424	0	3.39222	91.7827
1	SFG-m	superior frontal gyrus, left, medial bank of gyrus	66.1995	31.9201	0	3.35648	91.0907
1	Pcu-s	precuneus, left, superior lateral bank of gyrus	70.8773	29.8134	0.0193405	3.22198	88.1881
1	Pcu-i	precuneus, left, inferior lateral bank of gyrus	67.6422	31.2392	0.00506637	3.31786	90.3049
1	Pcu-i	precuneus, right, inferior lateral bank of gyrus	72.5874	29.111	0.00944242	3.16016	86.6032
1	Cun-str	cuneus, left, striate	74.3626	28.4161	0	3.10567	85.2394
1	Cun-str	cuneus, right, striate	66.782	31.6416	0.00513163	3.33687	90.5628
1	SPL-s	superior parietal lobule, left, superior bank of gyrus	70.209	30.0971	0	3.24228	88.706
1	SPL-i	superior parietal lobule, left, inferior bank of gyrus	71.196	29.6799	0.0240674	3.21002	87.9021
1	SPL-i	superior parietal lobule, left, inferior bank of gyrus	67.3852	31.3584	0.0101714	3.32507	90.4424
1	AnG-s	angular gyrus, left, superior bank of gyrus	63.1528	33.46	0	3.44134	92.5764
1	MFG-s	middle frontal gyrus, left, superior bank of gyrus	65.1371	32.4407	0	3.39373	91.8223
1	SFG-l	superior frontal gyrus, left, lateral bank of gyrus	68.427	30.881	0	3.29807	89.9322
1	MFG-s	middle frontal gyrus, right, superior bank of gyrus	70.682	29.8958	0	3.22346	88.1325
1	SFG-m	superior frontal gyrus, left, medial bank of gyrus	72.9883	28.9511	0	3.15572	86.6154
1	LiG-pest	lingual gyrus, left, peristriate	70.2193	30.0927	0.0244021	3.2363	88.4318
1	IRoG	inferior rostral gyrus, right	70.6237	29.9204	0.00485248	3.23371	88.5187
1	LiG-pest	lingual gyrus, left, peristriate	71.8197	29.4222	0	3.18238	87.1358
1	LiG-pest	lingual gyrus, left, peristriate	69.8081	30.27	0	3.24847	88.7489
1	FP-s	frontal pole, left, superior aspect	70.4729	29.9844	0.0291772	3.23307	88.4433
1	AnG-i	angular gyrus, left, inferior bank of gyrus	58.3619	36.2067	0.017616	3.56634	94.4516
1	SPL-s	superior parietal lobule, right, superior bank of gyrus	70.2022	30.1001	0	3.23752	88.5227
1	GRe	gyrus rectus, right	69.1467	30.5595	0	3.27769	89.5119
1	MOrG	medial orbital gyrus, right	71.0144	29.7558	0.0241289	3.2122	87.8558
1	SFG-m	superior frontal gyrus, right, medial bank of gyrus	71.8574	29.4067	0.00953834	3.18872	87.368
1	IRoG	inferior rostral gyrus, right	70.0685	30.1575	0	3.24531	88.7161
1	SFG-l	superior frontal gyrus, right, lateral bank of gyrus	66.5079	31.772	0	3.35517	91.0755
1	MFG-s	middle frontal gyrus, right, superior bank of gyrus	69.5271	30.3924	0.00985804	3.2658	89.2635
1	MFG-s	middle frontal gyrus, right, superior bank of gyrus	70.281	30.0663	0	3.24318	88.7629
1	MFG-i	middle frontal gyrus, right, inferior bank of gyrus	69.4483	30.4268	0.00986923	3.26259	89.0451
1	STG-i	superior temporal gyrus, right, inferior bank of gyrus	74.6504	28.3065	0.00459074	3.10061	85.1455
1	Dt	dentate nucleus, right	54.318	38.8959	0.0378549	3.60361	94.2723
1	Fas	fastigial nucleus, left	57.9404	36.4701	0.00591471	3.5409	93.7069
1	Dt	dentate nucleus, right	67.4949	31.3074	0	3.28529	88.8924
1	Dt	dentate nucleus, left	63.5195	33.2668	0.0053952	3.40642	91.5005
1	Cl	claustrum, right	56.9911	37.0776	0.0541191	3.565	93.7886
1	DG	dentate gyrus, left	69.7601	30.2908	0.00491256	3.17793	86.2114
1	DTA	anterior group of nuclei, right	61.9705	34.0983	0	3.44673	92.1494
1	Pa	paraventricular nuclei, left of thalamus, left	69.928	30.2181	0	3.19465	86.8301
1	SI	substantia innominata, left	64.8458	32.5864	0.0317091	3.36815	90.6436
1	S	subiculum, right	62.512	33.803	0.0328929	3.44159	92.1012
1	CA1	CA1 field, right	47.5326	44.4557	0.00720981	3.80285	96.6858
1	CA2	CA2 field, right	60.3221	35.0301	0	3.49748	93.1594
1	CA3	CA3 field, right	61.6038	34.3013	0.00556297	3.45912	92.4019
1	CA4	CA4 field, right	47.0425	44.9188	0	3.77629	96.343
1	DG	dentate gyrus, right	57.2104	36.9294	0.00599018	3.46948	91.4035
1	TCd	tail of caudate nucleus, right	38.828	53.3981	0.00882613	3.97522	97.581
1	LHM	lateral hypothalamic area, mammillary region, left	47.4949	44.4621	0.0144311	3.76531	96.0383
1	LHM	lateral hypothalamic area, mammillary region, right	57.3098	36.8714	0.0119596	3.57126	94.176
1	PHA	posterior hypothalamic area, left	63.5332	33.2596	0	3.42353	92.0932
1	PHA	posterior hypothalamic area, right	59.2255	35.6787	0	3.52692	93.607
1	SNC	substantia nigra, pars compacta, right	46.0281	45.9013	0	3.82705	97.0811
1	DTA	anterior group of nuclei, left	59.9417	35.2524	0	3.50972	93.3806
1	DTM	medial group of nuclei, left	42.841	49.3001	0.00799936	3.88151	97.1537
1	ILr	rostral group of intralaminar nuclei, right	59.9212	35.2645	0.00571919	3.51486	93.5139
1	Sb	subthalamic nucleus, right	45.3393	46.6062	0.0226757	3.80845	96.2087
1	Pa	paraventricular nuclei, left of thalamus, left	43.7766	48.2621	0.0234852	3.83708	96.2926
1	Pa	paraventricular nuclei, right of thalamus, right	61.3571	34.4392	0.00558534	3.44023	91.6729
1	CGMB	central gray substance of midbrain, left	41.3125	51.1489	0	3.91671	97.496
1	VTA	ventral tegmental area, left	57.0356	37.0486	0.00600853	3.57542	94.2627
1	VTA	ventral tegmental area, right	36.3057	58.08	0	4.03607	98.3215
1	DTA	anterior group of nuclei, left	56.1446	37.6366	0.0183117	3.59156	94.4817
1	DTM	medial group of nuclei, left	63.379	33.3405	0.00540716	3.40335	91.3171
1	DTLv	lateral group of nuclei, left, ventral division	47.5463	44.4428	0	3.79056	96.8005
1	ILr	rostral group of intralaminar nuclei, left	51.8643	40.7427	0.00660764	3.70154	95.7988
1	DTA	anterior group of nuclei, right	59.1261	35.7387	0	3.53422	93.8707
1	DTM	medial group of nuclei, right	50.5312	41.8176	0.00678196	3.7356	96.3931
1	DTLv	lateral group of nuclei, right, ventral division	56.7786	37.2163	0	3.59936	94.8103
1	ILr	rostral group of intralaminar nuclei, right	60.4661	34.9467	0	3.50391	93.434
1	ILc	caudal group of intralaminar nuclei, right	55.4524	38.1064	0	3.61646	94.9719
1	R	reticular nucleus of thalamus, left	38.3105	55.1302	0	3.9909	98.0353
1	R	reticular nucleus of thalamus, right	48.0466	43.98	0.00713267	3.75396	96.0764
1	Pa	paraventricular nuclei, left of thalamus, left	44.2426	47.3354	0	3.74944	94.8125
1	Pa	paraventricular nuclei, right of thalamus, right	60.9082	34.6931	0.00562651	3.4206	91.0341
1	CGMB	central gray substance of midbrain, left	40.7437	51.8378	0	3.92184	97.601
1	CGMB	central gray substance of midbrain, right	62.9541	33.5656	0.00544366	3.43601	92.1812
1	3	oculomotor nuclear complex, left	58.7731	35.9534	0.0116618	3.52304	93.3606
1	3	oculomotor nuclear complex, right	32.2173	64.408	0.0106372	4.09406	98.1268
1	RN	red nucleus, left	50.3461	41.9713	0	3.73792	96.3943
1	SNC	substantia nigra, pars compacta, left	48.9171	43.1904	0	3.75487	96.3293
1	MPB	medial parabrachial nucleus, left	44.791	47.1691	0	3.86888	97.3504
1	Pr5	principal sensory nucleus of trigeminal nerve, left	56.1172	37.655	0	3.58823	94.3205
1	7	facial motor nucleus, left	55.3941	38.1465	0	3.60726	94.7439
1	12	hypoglossal nucleus, right	57.8958	36.4982	0	3.46754	91.4156
1	12	hypoglossal nucleus, right	49.0679	43.0577	0	3.72271	95.6948
1	12	hypoglossal nucleus, left	55.0617	38.3768	0	3.58709	94.0788
1	SNR	substantia nigra, pars reticulata, left	61.6244	34.2898	0	3.46355	92.6244
1	7	facial motor nucleus, right	51.1412	41.3188	0	3.72154	96.2905
1	VTA	ventral tegmental area, left	58.6429	36.0332	0	3.55216	94.18
1	7	facial motor nucleus, right	57.9095	36.4895	0	3.54075	93.6231
1	COMA	cortico-medial group, left	41.6141	50.7782	0	3.9198	97.7792
1	RaM	raphe nuclei of medulla	59.9349	35.2564	0	3.50985	93.3273
1	Mo5	motor nucleus of trigeminal nerve, right	45.0274	46.929	0	3.85063	97.5192
1	IO	inferior olivary complex, right	59.0987	35.7553	0.0115976	3.48472	92.3963
1	Mo5	motor nucleus of trigeminal nerve, left	50.1097	42.1693	0	3.72911	96.2136
1	MPB	medial parabrachial nucleus,right	45.6134	46.3261	0	3.77745	95.3869
1	LPB	lateral parabrachial nucleus, left	53.66	39.3792	0	3.61048	93.889
1	CGMB	central gray substance of midbrain, right	51.3674	41.1368	0	3.73134	96.4587
1	SNR	substantia nigra, pars reticulata, right	43.331	48.7583	0	3.88167	97.5005
1	RN	red nucleus, left	42.7519	49.4028	0.0160321	3.8863	97.2896
1	LC	locus ceruleus, right	62.1899	33.9781	0.00551055	3.45265	92.48
1	Pn	pontine nuclei, right	58.3756	36.1982	0	3.54369	93.8826
1	SubC	nucleus subceruleus, left	49.2495	42.9059	0.00695846	3.77966	96.926
1	LC	locus ceruleus, right	62.8307	33.6315	0.0218174	3.43057	91.952
1	PRF	pontine reticular formation, left	50.6683	41.7044	0.0202908	3.73947	96.3856
1	VTA	ventral tegmental area, left	58.523	36.107	0.0117117	3.53817	93.6543
1	Arc	arcuate nucleus of medulla, right	59.3454	35.6066	0.00577467	3.50995	93.1504
1	Pn	pontine nuclei, right	60.73	34.7949	0	3.48438	92.9157
1	Pn	pontine nuclei, left	53.5093	39.4902	0	3.66795	95.6324
1	Pn	pontine nuclei, left	56.4462	37.4355	0.00607128	3.58257	94.3099
1	LPB	lateral parabrachial nucleus, left	45.8807	46.0562	0.0149388	3.83398	97.0479
1	LPB	lateral parabrachial nucleus, right	43.7868	48.2586	0.00782656	3.89547	97.5327
1	PRF	pontine reticular formation, left	53.9548	39.1641	0.00635163	3.6505	95.1919
1	CA2	CA2 field, right	70.5655	29.9451	0.00485649	3.21254	87.628
1	MBRF	midbrain reticular formation, left	54.0644	39.0783	0	3.66064	95.5436
1	Pn	pontine nuclei, left	55.4215	38.1276	0.00618353	3.61237	94.7327
1	MBRF	midbrain reticular formation, right	58.1803	36.3197	0.00589032	3.56121	94.2104
1	Pr5	principal sensory nucleus of trigeminal nerve, right	53.8725	39.2239	0.0127226	3.62961	94.5832
1	LC	locus ceruleus, left	59.3283	35.6169	0.0231054	3.51632	93.2423
1	MBRF	midbrain reticular formation, left	56.0727	37.6849	0.00611172	3.59646	94.47
1	CA1	CA1 field, left	61.4633	34.3797	0.0111514	3.4664	92.5734
1	PRF	pontine reticular formation, right	61.9602	34.104	0.00553097	3.45377	92.2971
1	PRF	pontine reticular formation, left	54.0062	39.1268	0.0126912	3.65293	95.2218
1	Pr5	principal sensory nucleus of trigeminal nerve, right	59.1432	35.7284	0.0115888	3.52135	93.4187
1	SubC	nucleus subceruleus, right	55.096	38.3529	0	3.64121	95.3601
1	CGMB	central gray substance of midbrain, left	53.7868	39.2864	0.00637146	3.65851	95.3727
1	SubCn	subcuneiform nucleus, right	51.3194	41.1753	0	3.7328	96.4968
1	MBRF	midbrain reticular formation, right	58.3687	36.2024	0	3.55794	94.2269
1	CGMB	central gray substance of midbrain, left	44.767	47.202	0	3.87976	97.8586
1	RN	red nucleus, right	48.1014	43.9299	0	3.7755	96.6514
1	SNR	substantia nigra, pars reticulata, right	49.6676	42.5447	0	3.76794	96.8906
1	CGMB	central gray substance of midbrain, right	53.5435	39.4649	0.00640041	3.67616	95.6714
1	LPB	lateral parabrachial nucleus, right	45.4318	46.5037	0	3.86182	97.4949
1	PRF	pontine reticular formation, right	58.3071	36.2407	0.00587751	3.56181	94.279
1	SNC	substantia nigra, pars compacta, left	51.3023	41.189	0.00668003	3.71158	96.0682
1	SubC	nucleus subceruleus, right	54.2186	38.9735	0	3.66025	95.5827
1	SubC	nucleus subceruleus, left	54.599	38.702	0	3.66106	95.7506
1	SNC	substantia nigra, pars compacta, right	49.791	42.4393	0	3.75841	96.751
1	PRF	pontine reticular formation, right	51.2269	41.2497	0.00668986	3.73611	96.5943
1	VTA	ventral tegmental area, right	55.0514	38.384	0.0124502	3.62405	94.8569
1	SOC	superior olivary complex, left	48.9788	43.143	0.0559754	3.76559	96.3996
1	4	trochlear nucleus, right	56.4942	37.4037	0.00606612	3.58105	94.3015
1	LC	locus ceruleus, left	66.0384	31.9979	0	3.34158	90.3472
1	SOC	superior olivary complex, right	51.7923	40.7993	0	3.71577	96.218
1	MBRa	midbrain raphe nuclei	57.1522	36.9731	0	3.57974	94.3975
1	Pn	pontine nuclei, right	63.6121	33.2184	0.0107747	3.39346	91.0892
1	SNC	substantia nigra, pars compacta, right	57.0596	37.033	0.012012	3.57186	94.2351
1	MBRa	midbrain raphe nuclei	58.4476	36.1478	0	3.54773	93.9391
1	MBRa	midbrain raphe nuclei	64.6813	32.6693	0.00529829	3.37971	90.9858
1	SubCn	subcuneiform nucleus, left	55.5072	38.0688	0	3.6229	95.0114
1	4	trochlear nucleus, left	56.8746	37.1535	0.0241022	3.5675	94.0179
1	ITG-mts	inferior temporal gyrus, right, bank of mts	60.6271	34.8539	0.0113052	3.50745	93.5634
1	ITG-mts	inferior temporal gyrus, left, bank of mts	64.5751	32.723	0	3.39427	91.6506
1	HCd	head of caudate nucleus, right	62.745	33.6774	0.0109236	3.41526	91.6407
1	Pu	putamen, left	63.9925	33.0209	0.0214213	3.38466	91.06
1	GRe	gyrus rectus, right	73.7937	28.6351	0.00464403	3.13036	85.9557
1	CgGp-i	cingulate gyrus, parietal part, right, inferior bank of gyrus	63.0535	33.5127	0.00543508	3.42337	91.9536
1	PoG-sl	postcentral gyrus, right, superior lateral aspect of gyrus	68.4578	30.867	0	3.29421	89.7963
1	STG-i	superior temporal gyrus, right, inferior bank of gyrus	69.3009	30.4915	0	3.27096	89.3176
1	PHG-cos	parahippocampal gyrus, left, bank of the cos	66.2577	31.892	0	3.36194	91.1785
1	STG-i	superior temporal gyrus, left, inferior bank of gyrus	71.4256	29.5845	0	3.19952	87.5988
1	SFG-m	superior frontal gyrus, left, medial bank of gyrus	65.6134	32.2052	0	3.38196	91.6301
1	SFG-m	superior frontal gyrus, right, medial bank of gyrus	65.8122	32.1079	0.0104145	3.3765	91.5061
1	SFG-l	superior frontal gyrus, left, lateral bank of gyrus	48.6977	43.3568	0	3.79025	96.4834
1	STG-l	superior temporal gyrus, right, lateral bank of gyrus	63.4647	33.2955	0.0161996	3.4214	92.0201
1	STG-i	superior temporal gyrus, right, inferior bank of gyrus	66.2714	31.8854	0.0258558	3.34579	90.7276
1	MTG-s	middle temporal gyrus, right, superior bank of gyrus	69.8355	30.2581	0.0343508	3.23163	88.0976
1	MTG-i	middle temporal gyrus, right, inferior bank of gyrus	67.6182	31.2503	0	3.3213	90.4058
1	ITG-mts	inferior temporal gyrus, right, bank of mts	65.9664	32.0328	0.00519508	3.37273	91.4438
1	STG-i	superior temporal gyrus, left, inferior bank of gyrus	75.0651	28.1501	0.00456538	3.08623	84.7776
1	MTG-s	middle temporal gyrus, left, superior bank of gyrus	68.1631	31.0005	0	3.30405	90.007
1	MTG-i	middle temporal gyrus, left, inferior bank of gyrus	66.4633	31.7933	0.0206249	3.33817	90.5195
1	ITG-l	inferior temporal gyrus, left, lateral bank of gyrus	69.7601	30.2908	0.0147377	3.25188	88.7779
1	ITG-mts	inferior temporal gyrus, left, bank of mts	72.0836	29.3144	0.0190168	3.17991	87.0914
1	ITG-its	inferior temporal gyrus, left, bank of the its	66.2234	31.9085	0	3.36328	91.2376
1	FuG-its	fusiform gyrus, left, bank of the its	58.8725	35.8927	0.0407474	3.51357	92.7775
1	FuG-l	fusiform gyrus, left, lateral bank of gyrus	63.6121	33.2184	0	3.42168	92.0978
1	FuG-cos	fusiform gyrus, left, bank of cos	65.9664	32.0172	0	3.36219	91.0327
1	PHG-l	parahippocampal gyrus, left, lateral bank of gyrus	58.05	36.4012	0.0118071	3.54999	93.7606
1	PHG-cos	parahippocampal gyrus, left, bank of the cos	60.73	34.7949	0.011286	3.48047	92.6456
1	MFG-i	middle frontal gyrus, left, inferior bank of gyrus	68.2625	30.9554	0	3.30494	90.1001
1	fro	frontal operculum, right	65.8568	32.0862	0.00520373	3.36896	91.284
1	Pu	putamen, right	61.0384	34.6191	0	3.475	92.7539
1	HCd	head of caudate nucleus, right	62.1179	34.0174	0.00551694	3.44348	92.1791
1	fro	frontal operculum, left	61.196	34.5299	0.0280002	3.4815	92.959
1	SIG	short insular gyri, left	64.7361	32.6416	0.0105876	3.39127	91.6323
1	Pu	putamen, left	65.7539	32.1363	0	3.3646	91.0956
1	MFG-s	middle frontal gyrus, right, superior bank of gyrus	63.8725	33.0829	0.0160961	3.41166	91.8526
1	opIFG	inferior frontal gyrus, opercular part, right	69.7738	30.2849	0.00491159	3.25539	88.9558
1	HG	Heschl's gyrus, right	57.0802	37.0197	0	3.59978	94.6894
1	TG	transverse gyri, right	61.22	34.5163	0.0111957	3.4783	92.705
1	PLT	planum temporale, right	59.4243	35.5594	0	3.53621	93.9248
1	SIG	short insular gyri, right	66.1241	31.9565	0	3.36936	91.4121
1	ITG-its	inferior temporal gyrus, right, bank of the its	65.0171	32.5005	0.00527093	3.37752	91.2415
1	FuG-its	fusiform gyrus, right, bank of the its	71.806	29.4278	0.00477259	3.19345	87.5119
1	FuG-l	fusiform gyrus, right, lateral bank of gyrus	71.4633	29.5689	0.00479547	3.19237	87.2672
1	FuG-cos	fusiform gyrus, right, bank of cos	66.0727	31.9813	0	3.34178	90.4785
1	PHG-l	parahippocampal gyrus, right, lateral bank of gyrus	66.477	31.7868	0.00515517	3.35078	90.8744
1	PHG-cos	parahippocampal gyrus, right, bank of the cos	65.9047	32.0628	0.00519994	3.37263	91.4049
1	SFG-l	superior frontal gyrus, left, lateral bank of gyrus	75.6374	27.9371	0	3.06644	84.2545
1	orIFG	inferior frontal gyrus, orbital part, right	66.0041	32.0145	0.00519211	3.37292	91.5157
1	MTG-s	middle temporal gyrus, left, superior bank of gyrus	64.1398	32.913	0	3.38098	91.049
1	ITG-mts	inferior temporal gyrus, left, bank of mts	70.1748	30.1118	0.00976706	3.24832	88.8743
1	PHG-l	parahippocampal gyrus, left, lateral bank of gyrus	63.3036	33.3803	0.0108272	3.43355	92.3507
1	PHG-cos	parahippocampal gyrus, left, bank of the cos	68.4064	30.8902	0	3.29758	89.8978
1	FuG-cos	fusiform gyrus, right, bank of cos	67.5977	31.2598	0	3.32568	90.559
1	MTG-s	middle temporal gyrus, left, superior bank of gyrus	65.8122	32.1079	0	3.37231	91.4254
1	PrG-sl	precentral gyrus, left, superior lateral aspect of gyrus	63.3585	33.3514	0	3.44836	92.9076
1	PoG-il	postcentral gyrus, right, inferior lateral aspect of gyrus	66.2063	31.9168	0.00517625	3.36131	91.2275
1	MFG-s	middle frontal gyrus, right, superior bank of gyrus	62.5942	33.7586	0.0328497	3.45824	92.8143
1	PHG-cos	parahippocampal gyrus, left, bank of the cos	73.5915	28.7138	0	3.13361	85.9578
1	Ve-VIIAt	VIIAt	63.4784	33.2883	0	3.37658	90.7849
1	PV-Crus I	Crus I, left, paravermis	62.2241	33.9594	0.00550752	3.41537	91.5194
1	PV-VIIIA	VIIIA, right, paravermis	65.2399	32.3896	0	3.34134	90.2521
1	HCd	head of caudate nucleus, left	69.9829	30.1944	0.0146908	3.23266	88.2018
1	SMG-i	supramarginal gyrus, right, inferior bank of gyrus	64.9246	32.5468	0	3.39878	91.8995
1	ITG-mts	inferior temporal gyrus, left, bank of mts	61.7101	34.2422	0	3.48499	93.2924
1	ITG-l	inferior temporal gyrus, right, lateral bank of gyrus	67.6422	31.2392	0	3.32482	90.5366
1	HCd	head of caudate nucleus, left	67.5805	31.2677	0	3.29492	89.4432
1	MFG-i	middle frontal gyrus, right, inferior bank of gyrus	62.4503	33.8364	0.00548757	3.46374	92.8993
1	MFG-s	middle frontal gyrus, right, superior bank of gyrus	64.4037	32.7994	0.0159634	3.40547	91.8806
1	BCd	body of caudate nucleus, left	62.0562	34.0512	0	3.46181	92.7874
1	GPe	globus pallidus, external segment, left	62.1419	34.0043	0	3.44563	92.3598
1	GPi	globus pallidus, internal segment, right	61.9363	34.1172	0.00553312	3.46013	92.6706
1	DTLv	lateral group of nuclei, left, ventral division	61.9054	34.1342	0	3.47161	93.0138
1	MG	medial geniculate complex, left	55.7882	37.877	0.00614288	3.6236	95.2618
1	MTG-i	middle temporal gyrus, right, inferior bank of gyrus	64.9726	32.5228	0.0158236	3.39744	91.8566
1	GPe	globus pallidus, external segment, right	54.5031	38.7701	0.00628773	3.64549	95.4109
1	ATZ	amygdalohippocampal transition zone, left	48.8382	43.2671	0	3.79037	96.9982
1	STG-l	superior temporal gyrus, left, lateral bank of gyrus	64.0062	33.0139	0.0321251	3.41814	92.1039
1	cgb	cingulum bundle, left	61.3571	34.4392	0.00558534	3.4176	91.404
1	cc	corpus callosum	59.1844	35.7035	0	3.4788	92.6204
1	Pu	putamen, right	62.9712	33.5565	0	3.4438	92.5767
1	PLT	planum temporale, left	61.645	34.2784	0	3.48909	93.4316
1	LIG	long insular gyri, left	70.1371	30.128	0	3.24555	88.7734
1	OTG-s	occipito-temporal gyrus, left, superior bank of gyrus	62.1761	33.9856	0	3.47531	93.3033
1	Glo	globose nucleus, left	55.1165	38.3386	0.0124355	3.62776	95.1303
1	STG-l	superior temporal gyrus, right, lateral bank of gyrus	57.5017	36.7483	0.00595983	3.59363	94.8987
1	MFG-s	middle frontal gyrus, right, superior bank of gyrus	73.6977	28.6724	0.00465008	3.13557	86.125
1	S	subiculum, left	54.3043	38.912	0	3.66322	95.7507
1	CA1	CA1 field, left	62.4229	33.8512	0.0164699	3.442	92.2383
1	CA2	CA2 field, left	58.9479	35.8468	0	3.53746	93.8955
1	CA3	CA3 field, left	61.0487	34.6132	0.00561356	3.44617	91.9445
1	CA4	CA4 field, left	54.5579	38.7312	0.0125628	3.64514	95.4896
1	DG	dentate gyrus, left	74.4414	28.386	0.00920726	3.04851	83.2482
1	TCd	tail of caudate nucleus, left	60.1439	35.1339	0	3.51117	93.538
1	S	subiculum, left	73.7046	28.6697	0.0185986	3.12348	85.6541
1	CA1	CA1 field, left	68.2796	30.9476	0.00501907	3.28165	89.225
1	CA2	CA2 field, left	43.218	48.878	0	3.91794	97.9041
1	CA3	CA3 field, left	66.0555	31.9896	0.0103761	3.31967	89.663
1	CA4	CA4 field, left	60.8465	34.7282	0	3.49134	93.2484
1	DG	dentate gyrus, left	74.7293	28.2766	0.00458589	3.05931	83.6977
1	DTA	anterior group of nuclei, left	67.6354	31.2424	0.00506688	3.30155	89.6395
1	DTM	medial group of nuclei, left	70.2536	30.078	0	3.22573	88.0512
1	DTLd	lateral group of nuclei, left, dorsal division	69.6093	30.3564	0.0098464	3.2439	88.4777
1	DTP	posterior group of nuclei, left	67.0631	31.509	0	3.32114	90.1436
1	ILr	rostral group of intralaminar nuclei, left	69.4345	30.4329	0.00493559	3.24906	88.5851
1	SC	superior colliculus, left	72.536	29.1316	0	3.15694	86.4486
1	S	subiculum, left	71.8472	29.4109	0	3.19173	87.4343
1	CA1	CA1 field, left	64.4859	32.7682	0	3.38446	91.2092
1	CA2	CA2 field, left	70.6683	29.9016	0.00969885	3.20862	87.5867
1	CA3	CA3 field, left	54.013	39.1219	0	3.6055	94.31
1	CA4	CA4 field, left	56.0418	37.7056	0	3.42897	89.6986
1	DG	dentate gyrus, left	73.3242	28.8185	0.00467377	3.08914	84.2662
1	SI	substantia innominata, left	68.0158	31.0677	0.00503854	3.2886	89.3485
1	CeA	central nucleus, left	71.6244	29.5024	0	3.18652	87.1826
1	COMA	cortico-medial group, left	59.599	35.4551	0.0057501	3.51754	93.5115
1	PHA	posterior hypothalamic area, left	60.538	34.9052	0	3.50269	93.4477
1	SptN	septal nuclei, left	58.7354	35.9764	0	3.55711	94.4148
1	SptN	septal nuclei, right	60.5209	34.9151	0.011325	3.50002	93.3539
1	SI	substantia innominata, right	66.1549	31.9416	0	3.35173	90.785
1	PrOR	preoptic region, left	70.3016	30.0575	0.0146242	3.21944	87.8257
1	PrOR	preoptic region, right	51.6381	40.9212	0	3.72121	96.3085
1	SO	supraoptic nucleus, left	55.9321	37.7734	0.00612708	3.58825	94.319
1	SO	supraoptic nucleus, right	47.087	44.818	0.0218341	3.80318	96.6071
1	S	subiculum, left	61.9911	34.087	0.0221129	3.46882	92.8924
1	CA2	CA2 field, left	55.8019	37.8616	0.00614137	3.6083	94.7011
1	CA3	CA3 field, left	55.2639	38.2364	0.00620117	3.6178	94.9356
1	CA4	CA4 field, left	54.8081	38.5544	0.00625274	3.62361	94.9753
1	DG	dentate gyrus, left	73.427	28.7781	0.0140017	3.07596	83.8459
1	DTLv	lateral group of nuclei, left, ventral division	60.5929	34.8736	0.00565579	3.50047	93.3366
1	LGd	dorsal lateral geniculate nucleus, left	70.1131	30.1383	0.0195513	3.21767	87.7277
1	CGMB	central gray substance of midbrain, left	61.1138	34.5763	0	3.48641	93.1887
1	PTec	pretectal region	65.5072	32.2574	0	3.36437	90.9763
1	S	subiculum, right	71.1515	29.6985	0.00481649	3.2024	87.5772
1	CA1	CA1 field, right	69.767	30.2878	0	3.24105	88.4063
1	CA2	CA2 field, right	67.207	31.4415	0	3.31325	89.8943
1	CA3	CA3 field, right	68.0672	31.0442	0.0100695	3.28571	89.2807
1	CA4	CA4 field, right	67.5703	31.2725	0.00507177	3.29518	89.3848
1	DG	dentate gyrus, right	74.9657	28.1874	0.00457143	3.05466	83.6152
1	TCd	tail of caudate nucleus, right	76.22	27.7236	0	3.03521	83.3266
1	DTM	medial group of nuclei, right	70.0891	30.1486	0	3.22885	88.0956
1	DTLd	lateral group of nuclei, right, dorsal division	68.8862	30.6751	0.0198995	3.26395	88.8297
1	DTLv	lateral group of nuclei, right, ventral division	64.27	32.8783	0.0053322	3.37979	90.9727
1	DTP	posterior group of nuclei, right	71.1103	29.7157	0	3.20412	87.5885
1	ILr	rostral group of intralaminar nuclei, right	73.1357	28.8927	0	3.1385	85.9642
1	ILc	caudal group of intralaminar nuclei, right	67.0493	31.5155	0.0102223	3.32173	90.1451
1	Hm	medial habenular nucleus, right	65.1645	32.427	0.00525901	3.35225	90.3278
1	Hl	lateral habenular nucleus, right	73.0466	28.928	0	3.13356	85.7883
1	CGMB	central gray substance of midbrain, left	62.9404	33.5729	0.00544484	3.43126	92.0862
1	CGMB	central gray substance of midbrain, right	66.3982	31.8245	0	3.33807	90.4319
1	PTec	pretectal region	58.0466	36.4034	0.00590388	3.57208	94.6061
1	DTLv	lateral group of nuclei, right, ventral division	71.7204	29.4629	0	3.17599	86.8299
1	S	subiculum, left	50.8499	41.5555	0	3.74293	96.5562
1	BLA	basolateral nucleus, left	39.2872	53.777	0	3.97882	98.2552
1	BMA	basomedial nucleus, left	28.0946	72.8714	0	4.23989	99.164
1	LA	lateral nucleus, left	55.6477	37.9727	0	3.62228	95.1378
1	LA	lateral nucleus, left	40.3324	52.3919	0.0169938	3.96864	98.096
1	Dt	dentate nucleus, left	58.5881	36.0669	0	3.53871	93.8637
1	Emb	emboliform nucleus, left	57.5703	36.7046	0.00595274	3.55927	94.1862
1	CA2	CA2 field, left	58.7731	35.9534	0.0174927	3.53364	93.7762
1	CA3	CA3 field, left	48.7354	43.3373	0.00703185	3.63067	93.4234
1	CA4	CA4 field, left	46.0966	45.8182	0	3.77297	96.3187
1	OTG-s	occipito-temporal gyrus, right, superior bank of gyrus	75.7574	27.8929	0.00452366	3.06381	84.1989
1	ITG-its	inferior temporal gyrus, left, bank of the its	72.0733	29.3186	0.0142647	3.17849	87.1181
1	OTG-s	occipito-temporal gyrus, right, superior bank of gyrus	74.0781	28.5252	0	3.12015	85.6707
1	OTG-i	occipito-temporal gyrus, left, inferior bank of gyrus	72.0151	29.3423	0	3.186	87.3514
1	ITG-its	inferior temporal gyrus, right, bank of the its	74.7121	28.2831	0	3.09744	85.0873
1	OTG-i	occipito-temporal gyrus, right, inferior bank of gyrus	70.3153	30.0517	0	3.23417	88.4478
1	STG-l	superior temporal gyrus, right, lateral bank of gyrus	71.4428	29.5774	0.00479685	3.19847	87.4847
1	MTG-s	middle temporal gyrus, right, superior bank of gyrus	70.658	29.9059	0.00970026	3.22411	88.2193
1	MTG-i	middle temporal gyrus, right, inferior bank of gyrus	73.1837	28.8738	0.0140482	3.14815	86.3715
1	ITG-l	inferior temporal gyrus, right, lateral bank of gyrus	76.9637	27.4557	0	3.02492	83.173
1	ITG-mts	inferior temporal gyrus, right, bank of mts	74.2838	28.4462	0.0046134	3.11567	85.5959
1	PoG-il	postcentral gyrus, left, inferior lateral aspect of gyrus	69.8047	30.2715	0.0245471	3.25543	88.9225
1	PoG-pcs	postcentral gyrus, left, bank of the posterior central sulcus	72.6731	29.0767	0.0330095	3.16327	86.754
1	SMG-s	supramarginal gyrus, left, superior bank of gyrus	74.0336	28.5423	0.0277739	3.11773	85.5675
1	SMG-i	supramarginal gyrus, left, inferior bank of gyrus	72.3098	29.2227	0.00947867	3.17822	87.1832
1	PrG-sl	precentral gyrus, left, superior lateral aspect of gyrus	71.782	29.4376	0	3.19782	87.6581
1	PrG-il	precentral gyrus, left, inferior lateral aspect of gyrus	73.3482	28.809	0	3.14572	86.3628
1	PrG-cs	precentral gyrus, left, bank of the central sulcus	75.048	28.1565	0.00913284	3.08578	84.7783
1	PoG-cs	postcentral gyrus, left, bank of the central sulcus	78.9513	26.7645	0.00868131	2.95389	81.2134
1	PoG-sl	postcentral gyrus, left, superior lateral aspect of gyrus	76.5696	27.597	0.00447567	3.03542	83.4404
1	PCLa-s	paracentral lobule, anterior part, right, superior bank of gyrus	73.3413	28.8117	0	3.1447	86.3262
1	PrG-sl	precentral gyrus, right, superior lateral aspect of gyrus	72.2995	29.2269	0.01422	3.17594	87.0823
1	PrG-il	precentral gyrus, right, inferior lateral aspect of gyrus	71.148	29.6999	0.0289003	3.20368	87.6061
1	PrG-cs	precentral gyrus, right, bank of the central sulcus	69.0062	30.6218	0.00993246	3.27338	89.2114
1	PoG-cs	postcentral gyrus, right, bank of the central sulcus	76.1446	27.751	0.013502	3.04442	83.5944
1	PoG-sl	postcentral gyrus, right, superior lateral aspect of gyrus	72.6319	29.0931	0.0283099	3.15969	86.5825
1	PoG-il	postcentral gyrus, right, inferior lateral aspect of gyrus	71.1515	29.6985	0	3.21317	87.9997
1	PoG-pcs	postcentral gyrus, right, bank of the posterior central sulcus	74.0781	28.5252	0.0185048	3.11904	85.6624
1	SMG-i	supramarginal gyrus, right, inferior bank of gyrus	74.5271	28.3533	0.0183933	3.10362	85.2349
1	LOrG	lateral orbital gyrus, right	70.682	29.8958	0	3.22605	88.2562
1	GRe	gyrus rectus, right	75.4215	28.0171	0.0045438	3.07541	84.5012
1	LiG-str	lingual gyrus, right, striate	70.5175	29.9655	0.0291588	3.22298	88.0679
1	PaOG	parolfactory gyri, left	73.0055	28.9443	0.00938835	3.1452	86.1466
1	MTG-i	middle temporal gyrus, left, inferior bank of gyrus	74.5305	28.352	0.00459812	3.10664	85.3472
1	ITG-mts	inferior temporal gyrus, left, bank of mts	76.0212	27.7961	0.00450796	3.05365	83.9202
1	FuG-its	fusiform gyrus, left, bank of the its	72.8855	28.9919	0.0282114	3.15341	86.4244
1	FuG-l	fusiform gyrus, left, lateral bank of gyrus	74.3557	28.4187	0.00460893	3.09844	84.9149
1	FuG-cos	fusiform gyrus, left, bank of cos	63.523	33.265	0.00539491	3.43201	92.3787
1	MFG-i	middle frontal gyrus, left, inferior bank of gyrus	74.0987	28.5173	0	3.1175	85.6033
1	MFG-i	middle frontal gyrus, left, inferior bank of gyrus	70.61	29.9262	0.0145603	3.22888	88.2989
1	SFG-m	superior frontal gyrus, left, medial bank of gyrus	69.1672	30.5505	0	3.27006	89.2516
1	SFG-l	superior frontal gyrus, left, lateral bank of gyrus	69.4071	30.4449	0	3.2701	89.307
1	CgGf-s	cingulate gyrus, frontal part, left, superior bank of gyrus	70.9356	29.7889	0	3.21831	87.9572
1	SCG	subcallosal cingulate gyrus, right	69.3934	30.4509	0	3.25865	88.8555
1	PaOG	parolfactory gyri, right	70.2262	30.0898	0.00487995	3.24194	88.6285
1	Pu	putamen, right	69.0747	30.5914	0.0099226	3.25603	88.6826
1	STG-l	superior temporal gyrus, left, lateral bank of gyrus	70.634	29.9161	0	3.22985	88.3829
1	MTG-s	middle temporal gyrus, left, superior bank of gyrus	71.5422	29.5363	0.0191608	3.19884	87.5932
1	PLP	planum polare, left	72.3989	29.1868	0	3.16769	86.7041
1	opIFG	inferior frontal gyrus, opercular part, left	71.5216	29.5448	0	3.20388	87.746
1	PCLa-s	paracentral lobule, anterior part, left, superior bank of gyrus	70.9973	29.763	0	3.21783	88.1108
1	PCLa-i	paracentral lobule, anterior part, left, inferior bank of gyrus	74.3866	28.4069	0.00460702	3.10668	85.2842
1	OTG-s	occipito-temporal gyrus, left, superior bank of gyrus	74.8286	28.2391	0	3.09579	85.0543
1	opIFG	inferior frontal gyrus, opercular part, right	71.1755	29.6885	0	3.21414	88.0419
1	fro	frontal operculum, right	75.5415	27.9726	0.00453659	3.06924	84.3056
1	HG	Heschl's gyrus, right	68.6737	30.77	0.00998054	3.28886	89.6864
1	SIG	short insular gyri, right	67.5497	31.282	0.0152199	3.31529	90.1211
1	CgGf-s	cingulate gyrus, frontal part, right, superior bank of gyrus	73.4921	28.7526	0	3.13851	86.1435
1	MTG-s	middle temporal gyrus, right, superior bank of gyrus	71.0281	29.7501	0.00964972	3.21167	87.7651
1	MTG-i	middle temporal gyrus, right, inferior bank of gyrus	74.2255	28.4685	0.00461702	3.11107	85.3539
1	ITG-its	inferior temporal gyrus, right, bank of the its	73.3002	28.8279	0.0140259	3.14099	86.186
1	ITG-l	inferior temporal gyrus, right, lateral bank of gyrus	73.0192	28.9388	0	3.15764	86.6602
1	FuG-its	fusiform gyrus, right, bank of the its	74.4208	28.3938	0.0046049	3.10778	85.3606
1	FuG-l	fusiform gyrus, right, lateral bank of gyrus	71.5319	29.5406	0	3.20329	87.716
1	FuG-cos	fusiform gyrus, right, bank of cos	67.1213	31.4817	0	3.3346	90.6507
1	PHG-cos	parahippocampal gyrus, right, bank of the cos	74.2049	28.4764	0	3.11782	85.6271
1	fro	frontal operculum, left	69.8698	30.2433	0	3.25524	88.9538
1	HCd	head of caudate nucleus, left	72.488	29.1509	0	3.15576	86.3758
1	Pu	putamen, left	68.2008	30.9834	0	3.28764	89.4766
1	Pu	putamen, left	68.3756	30.9042	0.00501203	3.28453	89.4438
1	MTG-i	middle temporal gyrus, right, inferior bank of gyrus	69.0644	30.5959	0.00992408	3.27483	89.3742
1	MTG-s	middle temporal gyrus, left, superior bank of gyrus	72.9918	28.9497	0	3.15749	86.6456
1	Pu	putamen, right	68.8245	30.7026	0.0199173	3.27123	89.0431
1	SMG-i	supramarginal gyrus, left, inferior bank of gyrus	76.7512	27.5317	0	3.03188	83.3649
1	MTG-s	middle temporal gyrus, right, superior bank of gyrus	69.4962	30.4058	0	3.27066	89.4151
1	ITG-its	inferior temporal gyrus, right, bank of the its	75.353	28.0426	0	3.07702	84.5554
1	HCd	head of caudate nucleus, right	72.9301	28.9742	0.00939805	3.14294	86.0623
1	HCd	head of caudate nucleus, left	74.7601	28.265	0.02292	3.08061	84.4597
1	MFG-s	middle frontal gyrus, right, superior bank of gyrus	72.2515	29.2463	0.0379453	3.1741	86.9616
1	SFG-m	superior frontal gyrus, right, medial bank of gyrus	72.6422	29.089	0	3.16951	86.9243
1	SFG-l	superior frontal gyrus, right, lateral bank of gyrus	73.523	28.7406	0	3.13775	86.1001
1	SFG-m	superior frontal gyrus, right, medial bank of gyrus	70.1508	30.1221	0	3.24778	88.8022
1	Arc	arcuate nucleus of medulla, left	67.6559	31.2329	0.00506534	3.2893	89.2285
1	Arc	arcuate nucleus of medulla, right	63.6018	33.2238	0	3.40409	91.516
1	GiRt	gigantocellular group, left	59.7704	35.3535	0	3.51657	93.5214
1	LMRt	lateral medullary reticular group, right	60.5723	34.8854	0.00565771	3.49873	93.2787
1	RaM	raphe nuclei of medulla	51.5147	41.0192	0	3.71179	95.964
1	Sp5	spinal trigeminal nucleus, left	56.5559	37.3629	0.012119	3.58208	94.3116
1	8Ve	vestibular nuclei, left	56.7718	37.1786	0.00603646	3.55894	93.9574
1	8Ve	vestibular nuclei, right	58.9719	35.8322	0	3.52391	93.4811
1	10	dorsal motor nucleus of the vagus, left	68.5744	30.8146	0.0049975	3.268	88.8016
1	10	dorsal motor nucleus of the vagus, right	70.4284	30.0034	0.0145978	3.2004	87.0964
1	6	abducens nucleus, left	58.7149	35.9715	0	3.52574	93.5441
1	6	abducens nucleus, right	64.9726	32.5228	0	3.36207	90.619
1	RPn	pontine raphe nucleus	59.9726	35.2343	0	3.51406	93.51
1	SOC	superior olivary complex, left	66.5079	31.772	0	3.31753	89.7168
1	SOC	superior olivary complex, right	67.1453	31.4704	0.00510386	3.31106	89.7322
1	Pn	pontine nuclei, left	64.6916	32.6641	0	3.37904	91.085
1	Pn	pontine nuclei, right	66.7409	31.6611	0.00513479	3.32227	89.9937
1	Sp5	spinal trigeminal nucleus, left	57.721	36.6087	0	3.57009	94.379
1	8Co	cochlear nuclei, right	60.2022	35.0999	0.00569249	3.49586	93.0881
1	IO	inferior olivary complex, left	59.5236	35.5	0.00575738	3.48313	92.5317
1	Pn	pontine nuclei, right	59.7224	35.3819	0.0172147	3.50527	93.1625
1	Arc	arcuate nucleus of medulla, left	70.2742	30.0692	0	3.2204	87.8223
1	Arc	arcuate nucleus of medulla, right	68.9068	30.6659	0.00994678	3.2542	88.4955
1	8Co	cochlear nuclei, left	52.5017	40.248	0.0130548	3.69308	95.802
1	GiRt	gigantocellular group, left	62.8924	33.5985	0	3.42959	92.0104
1	GiRt	gigantocellular group, right	63.852	33.0936	0	3.40217	91.4506
1	8Ve	vestibular nuclei, left	57.8581	36.5219	0	3.56252	94.1558
1	8Ve	vestibular nuclei, right	61.5045	34.3567	0.00557196	3.44384	91.9058
1	PRF	pontine reticular formation, right	53.5915	39.3848	0.00639468	3.6592	95.5428
1	SOC	superior olivary complex, left	57.6422	36.6587	0	3.55184	93.9142
1	Pn	pontine nuclei, right	62.3372	33.8977	0.00549753	3.43627	92.0198
1	Sp5	spinal trigeminal nucleus, right	64.3215	32.852	0.0106559	3.37839	90.8631
1	6	abducens nucleus, left	54.8252	38.5423	0	3.62818	95.1231
1	6	abducens nucleus, right	62.8033	33.6462	0	3.42929	92.007
1	Arc	arcuate nucleus of medulla, left	55.7162	37.9259	0	3.60758	94.7331
1	Pn	pontine nuclei, left	69.2872	30.4976	0.00494609	3.24535	88.3398
1	MOrG	medial orbital gyrus, right	71.0966	29.7214	0.00964041	3.21483	87.9794
1	MFG-i	middle frontal gyrus, left, inferior bank of gyrus	75.2947	28.0643	0	3.07771	84.5726
1	trIFG	inferior frontal gyrus, triangular part, left	74.3557	28.4187	0.0230447	3.10733	85.3221
1	orIFG	inferior frontal gyrus, orbital part, left	73.6566	28.6884	0	3.12925	85.8789
1	fro	frontal operculum, left	72.1145	29.3019	0.0142565	3.18151	87.2059
1	SIG	short insular gyri, left	70.1131	30.1383	0	3.24424	88.7159
1	SFG-l	superior frontal gyrus, left, lateral bank of gyrus	70.5826	29.9379	0	3.23217	88.4618
1	MFG-s	middle frontal gyrus, left, superior bank of gyrus	76.6381	27.5723	0	3.03427	83.4273
1	SFG-l	superior frontal gyrus, right, lateral bank of gyrus	72.0493	29.3284	0.00951294	3.17259	86.8807
1	MFG-s	middle frontal gyrus, right, superior bank of gyrus	71.6655	29.4855	0.0286917	3.18781	87.227
1	MFG-i	middle frontal gyrus, right, inferior bank of gyrus	71.8746	29.3997	0.0238402	3.17516	86.9306
1	POrG	posterior orbital gyrus, right	74.5134	28.3586	0	3.10641	85.3388
1	TP-m	temporal pole, right, medial aspect	73.1768	28.8765	0.0187327	3.13429	85.8777
1	TP-s	temporal pole, right, superior aspect	72.8239	29.0165	0	3.14869	86.2965
1	TP-i	temporal pole, right, inferior aspect	63.4202	33.3189	0.0108073	3.42813	92.2136
1	TP-s	temporal pole, left, superior aspect	67.3818	31.36	0	3.32456	90.4387
1	TP-i	temporal pole, left, inferior aspect	69.671	30.3296	0	3.25022	88.7615
1	TP-m	temporal pole, left, medial aspect	69.7361	30.3012	0.0147427	3.25449	88.8631
1	CgGf-s	cingulate gyrus, frontal part, right, superior bank of gyrus	72.4366	29.1716	0.00473104	3.17199	86.9875
1	CgGf-i	cingulate gyrus, frontal part, left, inferior bank of gyrus	72.4469	29.1675	0.0141911	3.17144	86.9419
1	CgGf-s	cingulate gyrus, frontal part, right, superior bank of gyrus	72.8341	29.0124	0	3.16073	86.6987
1	SIG	short insular gyri, right	73.4716	28.7607	0.0046644	3.13817	86.1255
1	PoG-il	postcentral gyrus, left, inferior lateral aspect of gyrus	68.1768	30.9943	0.0100533	3.3088	90.1862
1	PoG-pcs	postcentral gyrus, left, bank of the posterior central sulcus	67.8307	31.1524	0.00505229	3.31494	90.2417
1	SMG-s	supramarginal gyrus, left, superior bank of gyrus	68.1528	31.0052	0	3.29727	89.7921
1	MTG-s	middle temporal gyrus, left, superior bank of gyrus	68.4099	30.8887	0	3.29099	89.7053
1	MTG-i	middle temporal gyrus, left, inferior bank of gyrus	69.7841	30.2804	0.00491087	3.2545	88.8804
1	SMG-i	supramarginal gyrus, left, inferior bank of gyrus	67.8204	31.1572	0.0101061	3.3131	90.203
1	ITG-its	inferior temporal gyrus, left, bank of the its	70.5757	29.9408	0.00485578	3.23018	88.3142
1	LiG-pest	lingual gyrus, right, peristriate	73.2934	28.8306	0	3.13785	85.9766
1	LiG-str	lingual gyrus, right, striate	67.3852	31.3584	0	3.32764	90.4598
1	OTG-i	occipito-temporal gyrus, right, inferior bank of gyrus	69.8938	30.2329	0	3.25629	89.0199
1	MTG-s	middle temporal gyrus, right, superior bank of gyrus	62.4503	33.8364	0	3.47479	93.2873
1	MTG-i	middle temporal gyrus, right, inferior bank of gyrus	67.7999	31.1565	0.00505459	3.30977	90.1303
1	LIG	long insular gyri, right	67.6799	31.2218	0.00506355	3.31958	90.3494
1	PCLa-i	paracentral lobule, anterior part, left, inferior bank of gyrus	72.5497	29.1261	0.00944733	3.17055	86.9604
1	Pcu-s	precuneus, right, superior lateral bank of gyrus	72.7039	29.0643	0.0141409	3.16072	86.6225
1	Pcu-i	precuneus, right, inferior lateral bank of gyrus	74.0541	28.5344	0	3.12215	85.7478
1	CgGp-i	cingulate gyrus, parietal part, right, inferior bank of gyrus	69.9349	30.2151	0.00490028	3.2465	88.6338
1	PrG-sl	precentral gyrus, left, superior lateral aspect of gyrus	74.7738	28.2598	0	3.09569	85.0358
1	PrG-il	precentral gyrus, left, inferior lateral aspect of gyrus	72.5737	29.1165	0	3.16718	86.8498
1	PrG-cs	precentral gyrus, left, bank of the central sulcus	68.355	30.9135	0.00501354	3.30153	89.9886
1	PoG-sl	postcentral gyrus, left, superior lateral aspect of gyrus	72.6662	29.0794	0	3.16418	86.7716
1	PrG-sl	precentral gyrus, right, superior lateral aspect of gyrus	71.5147	29.5476	0.0191681	3.19622	87.4857
1	PrG-cs	precentral gyrus, right, bank of the central sulcus	69.1947	30.5384	0	3.26142	88.958
1	PCLa-s	paracentral lobule, anterior part, right, superior bank of gyrus	71.1995	29.6785	0	3.21276	87.9286
1	PCLa-i	paracentral lobule, anterior part, right, inferior bank of gyrus	65.7814	32.1229	0	3.38075	91.6306
1	PoG-sl	postcentral gyrus, right, superior lateral aspect of gyrus	71.9979	29.3493	0	3.18666	87.3706
1	PoG-pcs	postcentral gyrus, right, bank of the posterior central sulcus	71.2851	29.6428	0	3.21049	87.8772
1	SMG-i	supramarginal gyrus, right, inferior bank of gyrus	69.3249	30.481	0	3.27455	89.423
1	SMG-s	supramarginal gyrus, right, superior bank of gyrus	70.9493	29.7831	0	3.22382	88.2483
1	Pcu-i	precuneus, left, inferior lateral bank of gyrus	71.4942	29.5561	0	3.19667	87.5463
1	MOrG	medial orbital gyrus, left	71.4702	29.5661	0	3.19386	87.4435
1	PCLa-s	paracentral lobule, anterior part, left, superior bank of gyrus	69.4311	30.4344	0	3.27053	89.3756
1	SFG-m	superior frontal gyrus, left, medial bank of gyrus	76.9123	27.474	0.0178229	3.02283	83.0954
1	Pcu-s	precuneus, left, superior lateral bank of gyrus	73.8108	28.6285	0	3.12891	85.9142
1	LiG-pest	lingual gyrus, left, peristriate	69.3009	30.4915	0	3.27381	89.3819
1	OTG-i	occipito-temporal gyrus, left, inferior bank of gyrus	68.4613	30.8655	0.0100115	3.29481	89.8298
1	LiG-str	lingual gyrus, left, striate	68.379	30.9026	0	3.29459	89.7415
1	LiG-str	lingual gyrus, left, striate	72.7039	29.0643	0	3.15997	86.6007
1	AnG-s	angular gyrus, right, superior bank of gyrus	70.1131	30.1383	0	3.24647	88.7983
1	SFG-l	superior frontal gyrus, left, lateral bank of gyrus	68.3756	30.9042	0	3.29994	89.9676
1	GRe	gyrus rectus, right	71.4496	29.5746	0	3.20518	87.7762
1	TP-i	temporal pole, right, inferior aspect	71.1995	29.6785	0	3.2145	88.0614
1	TP-m	temporal pole, left, medial aspect	73.7491	28.6524	0.00464684	3.13073	85.9525
1	SFG-l	superior frontal gyrus, right, lateral bank of gyrus	74.599	28.326	0.0045939	3.10158	85.1879
1	orIFG	inferior frontal gyrus, orbital part, right	70.4455	29.9961	0	3.23875	88.6491
1	trIFG	inferior frontal gyrus, triangular part, left	73.1426	28.89	0	3.14884	86.4299
1	SMG-s	supramarginal gyrus, right, superior bank of gyrus	72.1624	29.2824	0.00474901	3.18092	87.1888
1	MTG-i	middle temporal gyrus, right, inferior bank of gyrus	70.7916	29.8494	0	3.22672	88.2949
1	MTG-i	middle temporal gyrus, left, inferior bank of gyrus	71.5216	29.5448	0.00479157	3.20056	87.6723
1	MFG-i	middle frontal gyrus, right, inferior bank of gyrus	70.8876	29.809	0.00483442	3.22297	88.2348
1	CA2	CA2 field, right	67.8992	31.121	0.0151416	3.27288	88.6579
1	Sp5	spinal trigeminal nucleus, right	40.867	51.4801	0	3.75019	93.9855
1	Sp5	spinal trigeminal nucleus, left	50.1885	42.1031	0	3.65443	94.0415
1	SOC	superior olivary complex, right	39.7772	52.925	0	3.83554	95.3355
1	8Ve	vestibular nuclei, right	52.0425	40.6032	0	3.61014	93.4992
1	Sp5	spinal trigeminal nucleus, left	50.5346	41.8147	0.040689	3.61332	93.1714
1	Pn	pontine nuclei, right	45.4489	46.358	0	3.64775	92.6125
1	Fas	fastigial nucleus, right	41.1138	51.3962	0	3.95521	98.4278
1	Glo	globose nucleus, right	47.4469	44.5359	0	3.80794	97.2657
1	Cl	claustrum, right	64.767	32.6261	0	3.39445	91.5802
1	Cl	claustrum, right	50.9938	41.4382	0	3.74327	96.4951
1	Cl	claustrum, left	49.8698	42.3722	0	3.76672	96.7837
1	S	subiculum, right	73.7629	28.6471	0.00464598	3.12627	85.7286
1	CA3	CA3 field, right	54.2186	38.9735	0.00632071	3.64019	95.2182
1	CA4	CA4 field, right	54.4997	38.7726	0	3.6287	95.0402
1	DG	dentate gyrus, right	56.5079	37.3946	0.0121293	3.57601	94.1698
1	TCd	tail of caudate nucleus, right	54.6813	38.6438	0	3.64438	95.4013
1	DG	dentate gyrus, right	67.1419	31.472	0.00510412	3.27906	88.7292
1	DTLd	lateral group of nuclei, right, dorsal division	60.7642	34.7753	0	3.50115	93.4872
1	CA1	CA1 field, right	51.292	41.1906	0	3.7274	96.3233
1	CA1	CA1 field, right	64.6367	32.6918	0.0318117	3.23289	85.9211
1	Cl	claustrum, right	59.085	35.7636	0	3.53608	93.8286
1	DTLv	lateral group of nuclei, right, ventral division	60.9424	34.6736	0	3.49176	93.3083
1	S	subiculum, right	65.209	32.4049	0	3.3792	91.2422
1	CA1	CA1 field, right	58.5435	36.0944	0.00585377	3.53464	93.657
1	CA3	CA3 field, right	58.0398	36.4077	0.00590458	3.53338	93.4971
1	TCd	tail of caudate nucleus, right	62.0528	34.0531	0.0110455	3.45949	92.7194
1	LGd	dorsal lateral geniculate nucleus, right	60.024	35.2041	0	3.49557	93.0987
1	Cl	claustrum, left	61.902	34.1361	0	3.46023	92.5975
1	Cl	claustrum, left	52.087	40.5685	0.00657938	3.70953	96.0405
1	S	subiculum, right	71.0966	29.7214	0	3.20107	87.3899
1	CA1	CA1 field, right	69.0267	30.6127	0	3.25659	88.612
1	CA3	CA3 field, right	58.122	36.3561	0	3.55307	94.1267
1	CA4	CA4 field, right	54.6916	38.6365	0.00626606	3.62361	94.8944
1	Sp5	spinal trigeminal nucleus, right	58.8588	35.901	0.00582242	3.53184	93.6906
1	CGS	central glial substance	66.2851	31.8788	0.0051701	3.24857	87.7714
1	Cu	cuneate nucleus, left	43.451	48.6316	0.0157741	3.86971	97.621
1	Cu	cuneate nucleus, right	48.4133	43.5549	0.00707864	3.74286	96.1924
1	LMRt	lateral medullary reticular group, left	48.3413	43.7119	0.0212675	3.78614	96.8194
1	LMRt	lateral medullary reticular group, right	53.1049	39.7909	0	3.67189	95.4372
1	Sp5	spinal trigeminal nucleus, left	61.5661	34.3223	0.00556638	3.4606	92.6015
1	Sp5	spinal trigeminal nucleus, right	63.1117	33.4818	0	3.41893	91.8208
1	Arc	arcuate nucleus of medulla, right	68.5778	30.8131	0	3.26082	88.6422
1	Cu	cuneate nucleus, left	50.0308	42.1604	0	3.72343	96.2449
1	Cu	cuneate nucleus, right	60.3804	34.9963	0.00567569	3.49641	93.185
1	10	dorsal motor nucleus of the vagus, left	62.7862	33.6554	0.0163747	3.42922	91.9521
1	10	dorsal motor nucleus of the vagus, right	63.6635	33.1808	0	3.399	91.4331
1	IO	inferior olivary complex, left	60.048	35.19	0.00570711	3.49504	93.1189
1	IO	inferior olivary complex, right	58.2042	36.3048	0	3.54595	93.9887
1	CMRt	central medullary reticular group, left	54.8218	38.5447	0	3.64644	95.5725
1	CMRt	central medullary reticular group, right	56.2714	37.5457	0.0121803	3.59774	94.7957
1	LMRt	lateral medullary reticular group, right	52.7073	40.091	0.00650195	3.69317	96.1069
1	Sp5	spinal trigeminal nucleus, left	51.573	40.9728	0	3.71816	96.3915
1	Sp5	spinal trigeminal nucleus, right	59.6367	35.4327	0	3.52346	93.7572
1	Gr	gracile nucleus, right	46.2371	45.5752	0	3.80362	97.0413
1	CGS	central glial substance	49.2461	42.888	0	3.65519	94.1547
1	Arc	arcuate nucleus of medulla, left	65.538	32.2422	0	3.3408	90.1504
1	CGS	central glial substance	56.6415	37.2761	0	3.47559	91.8213
1	Cu	cuneate nucleus, right	53.3071	39.5436	0	3.64869	95.3969
1	10	dorsal motor nucleus of the vagus, left	57.7279	36.6043	0	3.54935	93.9404
1	10	dorsal motor nucleus of the vagus, right	53.9445	39.1716	0	3.64241	95.3142
1	Gr	gracile nucleus, left	48.9445	43.1732	0	3.73814	96.3249
1	Gr	gracile nucleus, right	50.6443	41.7174	0	3.68647	95.5341
1	12	hypoglossal nucleus, left	51.8472	40.7496	0	3.68545	95.8194
1	12	hypoglossal nucleus, right	54.1981	38.9883	0	3.65012	95.5461
1	IO	inferior olivary complex, left	61.0624	34.6055	0	3.47482	92.8455
1	IO	inferior olivary complex, right	51.4428	41.0699	0	3.68679	95.6344
1	CMRt	central medullary reticular group, left	43.4613	48.6122	0.00788519	3.83293	96.8268
1	CMRt	central medullary reticular group, right	45.5689	46.0931	0	3.75878	95.8903
1	LMRt	lateral medullary reticular group, left	50.0411	42.2271	0	3.71805	96.0414
1	LMRt	lateral medullary reticular group, right	45.658	46.2809	0.0225175	3.81248	96.88
1	Sp5	spinal trigeminal nucleus, left	52.4743	40.2691	0	3.6352	94.6131
1	Sp5	spinal trigeminal nucleus, right	55.9184	37.7888	0.00612858	3.57281	93.9361
1	CGS	central glial substance	67.8101	31.1619	0	3.24054	87.7379
1	Gr	gracile nucleus, right	41.6724	50.5674	0	3.91475	97.758
1	CMRt	central medullary reticular group, left	52.6765	40.1145	0	3.66846	95.4297
1	CMRt	central medullary reticular group, right	40.9493	51.5859	0	3.95634	98.3027
1	Sp5	spinal trigeminal nucleus, left	60.4901	34.9329	0	3.49417	93.1239
1	GRe	gyrus rectus, right	65.9184	32.0561	0.0155966	3.36358	91.1657
1	MOrG	medial orbital gyrus, right	66.3571	31.8442	0	3.35327	91.0175
1	CgGf-i	cingulate gyrus, frontal part, right, inferior bank of gyrus	72.889	28.9905	0.014105	3.15575	86.5444
1	trIFG	inferior frontal gyrus, triangular part, right	73.1254	28.8968	0.00937295	3.14734	86.2771
1	orIFG	inferior frontal gyrus, orbital part, right	72.1247	29.2977	0.00950299	3.18459	87.3231
1	TP-i	temporal pole, right, inferior aspect	66.4976	31.777	0.0103072	3.34167	90.6848
1	SFG-l	superior frontal gyrus, left, lateral bank of gyrus	66.0075	32.0129	0.0103837	3.35787	91.003
1	SFG-m	superior frontal gyrus, right, medial bank of gyrus	64.0302	33.0015	0	3.41851	92.1869
1	SFG-l	superior frontal gyrus, right, lateral bank of gyrus	61.4565	34.3835	0	3.48951	93.4148
1	LiG-pest	lingual gyrus, right, peristriate	60.2981	35.044	0	3.52128	93.9081
1	Pcu-i	precuneus, left, inferior lateral bank of gyrus	70.209	30.0971	0	3.22783	88.1573
1	PCLp-cs	paracentral lobule, posterior part, right, bank of cingulate sulcus	63.2488	33.4092	0.00541829	3.44123	92.6043
1	Cun-pest	cuneus, left, peristriate	72.4572	29.1633	0	3.17069	86.9503
1	GRe	gyrus rectus, left	67.7724	31.1792	0	3.30756	90.0289
1	CgGf-i	cingulate gyrus, frontal part, left, inferior bank of gyrus	65.9047	32.0628	0.00519994	3.36891	91.348
1	SFG-m	superior frontal gyrus, left, medial bank of gyrus	75.9904	27.8073	0	3.05599	83.9957
1	LiG-pest	lingual gyrus, left, peristriate	67.1419	31.472	0.00510412	3.31667	89.9912
1	AnG-s	angular gyrus, right, superior bank of gyrus	64.0096	33.0121	0	3.42073	92.2345
1	AnG-i	angular gyrus, right, inferior bank of gyrus	63.499	33.2776	0	3.43585	92.5506
1	SFG-m	superior frontal gyrus, right, medial bank of gyrus	62.6182	33.7401	0	3.46491	93.12
1	PCLa-s	paracentral lobule, anterior part, left, superior bank of gyrus	61.6929	34.2517	0	3.48876	93.4595
1	PCLp-l	paracentral lobule, posterior part, right, lateral bank of gyrus	63.8382	33.1007	0.00536826	3.42538	92.3324
1	PCLp-l	paracentral lobule, posterior part, right, lateral bank of gyrus	65.3187	32.3505	0.0104932	3.37846	91.4287
1	SFG-l	superior frontal gyrus, right, lateral bank of gyrus	64.952	32.5331	0	3.39575	91.8626
1	MFG-i	middle frontal gyrus, left, inferior bank of gyrus	68.194	30.9865	0	3.30596	90.1531
1	trIFG	inferior frontal gyrus, triangular part, left	73.1734	28.8779	0.0046834	3.14561	86.2898
1	LOrG	lateral orbital gyrus, left	70.3873	30.0209	0	3.23717	88.545
1	PV-VI	VI, right, paravermis	72.1624	29.2824	0.00474901	3.14078	85.7989
1	Pu	putamen, left	70.6854	29.8943	0.00484825	3.21133	87.6516
1	Acb	nucleus accumbens, left	66.8266	31.6205	0.00512821	3.33367	90.4535
1	PCLa-s	paracentral lobule, anterior part, right, superior bank of gyrus	72.9267	28.9756	0.00469925	3.15623	86.5401
1	PoG-sl	postcentral gyrus, left, superior lateral aspect of gyrus	71.9911	29.3521	0	3.18335	87.1746
1	He-VI	VI, left, lateral hemisphere	72.5463	29.1275	0	3.12234	85.2576
1	He-Crus I	Crus I, left, lateral hemisphere	60.4661	34.9467	0.0113353	3.45216	92.0381
1	He-Crus II	Crus II, left, lateral hemisphere	67.9027	31.1194	0.0100939	3.26363	88.6339
1	He-VIIB	VIIB, left, lateral hemisphere	71.5559	29.5115	0.00478927	3.1437	85.7428
1	He-VIIIA	VIIIA, left, lateral hemisphere	70.0754	30.1545	0	3.19119	86.8887
1	HCd	head of caudate nucleus, left	71.6724	29.4826	0	3.18512	87.1592
1	Pu	putamen, left	68.403	30.8918	0.01002	3.28692	89.454
1	HCd	head of caudate nucleus, right	68.5675	30.8177	0.004998	3.28044	89.3131
1	Pu	putamen, right	72.6114	29.1014	0.014159	3.14423	85.9589
1	Ve-I-II	I-II	73.17	28.8792	0	3.10993	85.0476
1	Ve-III	III	71.4016	29.5944	0	3.16276	86.2956
1	Ve-IX	IX	71.9568	29.3661	0	3.13715	85.6191
1	Ve-III	III	63.6429	33.2023	0.0161542	3.37519	90.694
1	Ve-IV	IV	71.0966	29.7214	0.00482021	3.16543	86.2981
1	Ve-V	V	72.1213	29.2991	0	3.14096	85.8024
1	Ve-VI	VI	68.7903	30.7179	0.0149454	3.23759	87.9922
1	Ve-VIIAf	VIIAf	65.5723	32.2254	0.0104526	3.32216	89.7071
1	Ve-VIIB	VIIB	73.1768	28.8765	0.0140495	3.10325	84.7797
1	Ve-VIIIA	VIIIA	67.4469	31.3297	0.0152431	3.27061	88.6855
1	Ve-VIIIB	VIIIB	74.2975	28.441	0	3.07058	83.9925
1	PV-III	III, left, paravermis	68.0843	31.0364	0	3.2638	88.5861
1	PV-IV	IV, left, paravermis	72.1864	29.2727	0.00474744	3.14388	85.9007
1	PV-V	V, left, paravermis	67.3304	31.3839	0.0101797	3.28594	89.1539
1	PV-VIIIB	VIIIB, left, paravermis	73.7731	28.6431	0.00929066	3.08475	84.344
1	PV-IX	IX, left, paravermis	65.3324	32.3437	0	3.32977	89.8901
1	PV-VI	VI, left, paravermis	75.6306	27.9396	0.0407812	3.02919	82.9613
1	PV-Crus II	Crus II, left, paravermis	70.843	29.8278	0.00483746	3.17233	86.4873
1	PV-VIIB	VIIB, left, paravermis	74.3386	28.4252	0.00460999	3.07059	84.0189
1	PV-VIIIA	VIIIA, left, paravermis	72.5805	29.1137	0	3.12175	85.278
1	He-Crus I	Crus I, right, lateral hemisphere	73.1563	28.8846	0.0046845	3.10384	84.823
1	He-Crus II	Crus II, right, lateral hemisphere	72.0631	29.3228	0.00475556	3.13837	85.6853
1	He-VIIB	VIIB, right, lateral hemisphere	71.5627	29.5278	0	3.16098	86.3104
1	He-VI	VI, right, lateral hemisphere	74.2084	28.4751	0	3.07167	84.0436
1	PV-V	V, right, paravermis	58.0021	36.4195	0.0295421	3.49839	92.304
1	PV-Crus I	Crus I, right, paravermis	73.355	28.8064	0.00467181	3.09952	84.7413
1	PV-Crus II	Crus II, right, paravermis	74.6642	28.3013	0.00458989	3.05923	83.7146
1	HCd	head of caudate nucleus, right	71.5284	29.542	0	3.18716	87.1162
1	BCd	body of caudate nucleus, left	69.6504	30.3385	0.00984058	3.24361	88.3959
1	BCd	body of caudate nucleus, right	74.5271	28.3533	0.00459834	3.09037	84.7168
1	AnG-s	angular gyrus, left, superior bank of gyrus	71.8129	29.425	0.00954426	3.18965	87.3337
1	PoG-cs	postcentral gyrus, right, bank of the central sulcus	71.4805	29.5618	0	3.2036	87.7336
1	Acb	nucleus accumbens, right	72.4846	29.1523	0	3.16649	86.7272
1	FP-s	frontal pole, left, superior aspect	70.4832	29.9801	0.00486216	3.2325	88.3761
1	STG-i	superior temporal gyrus, left, inferior bank of gyrus	69.5168	30.3968	0.0098595	3.26247	89.0259
1	HCd	head of caudate nucleus, right	69.7533	30.2938	0.00491304	3.24211	88.3811
1	Pu	putamen, right	69.791	30.2774	0	3.23371	88.1166
1	GPe	globus pallidus, external segment, right	70.3324	30.0443	0.0243629	3.21371	87.595
1	Pu	putamen, left	72.6696	29.078	0	3.14592	86.0523
1	Pu	putamen, left	70.8533	29.8235	0	3.19726	87.1976
1	HCd	head of caudate nucleus, left	70.9116	29.799	0	3.20305	87.4389
1	GPe	globus pallidus, external segment, left	67.5154	31.2979	0.00507588	3.30241	89.5972
1	GPi	globus pallidus, internal segment, left	68.5709	30.8161	0	3.26832	88.8322
1	GPi	globus pallidus, internal segment, right	66.0247	32.0046	0	3.34874	90.6259
1	BCd	body of caudate nucleus, right	68.6635	30.7746	0.00499102	3.27428	89.0994
1	MTG-i	middle temporal gyrus, right, inferior bank of gyrus	74.7293	28.2766	0	3.09739	85.081
1	SPL-s	superior parietal lobule, left, superior bank of gyrus	71.2817	29.6442	0.0240385	3.21047	87.9369
1	Pu	putamen, right	69.085	30.5868	0.0148817	3.26066	88.8016
1	SFG-l	superior frontal gyrus, right, lateral bank of gyrus	62.5497	33.7826	0.00547885	3.45756	92.6697
1	PV-III	III, right, paravermis	73.6463	28.6924	0	3.09504	84.6527
1	PV-IV	IV, right, paravermis	71.1343	29.7056	0.00481765	3.17253	86.574
1	PV-VIIB	VIIB, right, paravermis	72.3338	29.2131	0.0142133	3.12755	85.3805
1	PV-VIIIB	VIIIB, right, paravermis	68.5161	30.8408	0	3.23018	87.6978
1	PV-IX	IX, right, paravermis	70.7162	29.8813	0.0339229	3.17336	86.4562
2	Cl	claustrum, left	61.3605	25.0042	0	2.78611	78.7119
2	Acb	nucleus accumbens, left	70.6374	21.7204	0	2.70139	76.8349
2	Acb	nucleus accumbens, right	71.8814	21.3445	0.00476758	2.69812	76.7493
2	Acb	nucleus accumbens, right	68.4441	22.4164	0	2.73099	77.526
2	SI	substantia innominata, right	66.196	23.1777	0	2.75175	78.0138
2	Cl	claustrum, right	60.6169	25.3109	0.00565355	2.78684	78.7432
2	GPe	globus pallidus, external segment, right	64.2872	23.8659	0	2.7607	78.2196
2	LA	lateral nucleus, right	57.9507	26.4695	0.00591366	2.81485	79.2556
2	ATZ	amygdalohippocampal transition zone, right	59.4654	25.7895	0.00576302	2.80101	78.9899
2	BLA	basolateral nucleus, right	64.0918	23.9333	0.010694	2.76013	78.1799
2	BMA	basomedial nucleus, right	67.111	22.8617	0	2.7395	77.7364
2	SI	substantia innominata, left	66.782	22.9743	0.0102633	2.74192	77.8376
2	SptN	septal nuclei, left	67.8307	22.6191	0	2.7345	77.6212
2	SptN	septal nuclei, right	68.66	22.3459	0	2.72761	77.5014
2	GPe	globus pallidus, external segment, left	69.8012	21.9806	0.00490966	2.71365	77.1639
2	Cl	claustrum, left	66.7889	22.9719	0.0102622	2.73269	77.5409
2	Cl	claustrum, right	54.7121	28.0301	0.0125274	2.82716	79.4379
2	Cl	claustrum, left	61.9979	24.7471	0	2.77643	78.4303
2	SptN	septal nuclei, left	65.5655	23.4006	0.00522685	2.74907	77.8554
2	CA1	CA1 field, right	66.0624	23.2246	0.00518753	2.74829	77.9379
2	CA2	CA2 field, right	69.8903	21.9525	0.024517	2.71848	77.2397
2	CA3	CA3 field, right	66.2851	23.1465	0	2.74227	77.74
2	CA4	CA4 field, right	68.7903	22.3036	0.00996363	2.71854	77.2381
2	DG	dentate gyrus, right	70.6854	21.7056	0.00484825	2.70344	76.8409
2	BCd	body of caudate nucleus, right	64.7738	23.6866	0.0105815	2.75757	78.1019
2	Acb	nucleus accumbens, right	61.5422	24.9304	0.00556855	2.78149	78.5598
2	Cl	claustrum, right	65.2639	23.5087	0	2.75763	78.1331
2	Cl	claustrum, left	62.6182	24.502	0	2.78075	78.6536
2	Acb	nucleus accumbens, left	67.5942	22.6982	0.00506997	2.73634	77.6724
2	Cl	claustrum, right	66.2303	23.1657	0	2.7489	77.9767
2	S	subiculum, left	52.0596	29.3397	0.00658285	2.84172	79.5653
2	CA1	CA1 field, left	54.6744	27.9742	0	2.82526	79.3038
2	CA2	CA2 field, left	66.2509	23.1585	0.00517277	2.74194	77.7637
2	CA3	CA3 field, left	50.9424	29.9495	0	2.85539	79.8314
2	CA4	CA4 field, left	69.8766	21.9568	0.00490436	2.71246	77.0654
2	DG	dentate gyrus, left	66.3982	23.1071	0.0206452	2.73126	77.4097
2	BCd	body of caudate nucleus, left	55.9561	27.4069	0	2.81638	79.1453
2	Pu	putamen, right	77.1761	19.8801	0.0133215	2.64878	75.5977
2	opIFG	inferior frontal gyrus, opercular part, right	74.4483	20.6085	0	2.67818	76.357
2	POrG	posterior orbital gyrus, right	73.8725	20.7692	0	2.67797	76.3337
2	TP-s	temporal pole, right, superior aspect	77.4229	19.8167	0.00442635	2.65062	75.6583
2	PrG-il	precentral gyrus, left, inferior lateral aspect of gyrus	76.501	20.0555	0.00447968	2.65627	75.8096
2	PaOG	parolfactory gyri, left	79.6025	19.2742	0	2.63729	75.3091
2	SIG	short insular gyri, left	76.4839	20.06	0	2.66032	75.9225
2	TP-s	temporal pole, left, superior aspect	74.6402	20.5556	0	2.67464	76.2605
2	TP-i	temporal pole, left, inferior aspect	71.4154	21.479	0.00479869	2.70192	76.8882
2	TP-i	temporal pole, right, inferior aspect	74.4825	20.5991	0.00920217	2.67468	76.2493
2	TP-m	temporal pole, right, medial aspect	77.512	19.794	0.00442126	2.65025	75.6673
2	TP-i	temporal pole, right, inferior aspect	74.5065	20.5924	0	2.67757	76.3245
2	PrG-prc	precentral gyrus, left, bank of the precentral sulcus	72.5942	21.1349	0.00944153	2.69102	76.6616
2	SFG-l	superior frontal gyrus, left, lateral bank of gyrus	73.9822	20.7384	0	2.68173	76.4282
2	MFG-s	middle frontal gyrus, left, superior bank of gyrus	73.0946	20.9902	0.00468845	2.68996	76.6168
2	SFG-l	superior frontal gyrus, right, lateral bank of gyrus	75.7505	20.2543	0	2.66481	75.9996
2	SFG-l	superior frontal gyrus, left, lateral bank of gyrus	72.9472	21.0326	0	2.68969	76.6046
2	SFG-l	superior frontal gyrus, right, lateral bank of gyrus	73.7731	20.7971	0	2.68125	76.4074
2	MFG-s	middle frontal gyrus, left, superior bank of gyrus	72.4674	21.1719	0.00472903	2.69238	76.6378
2	MFG-s	middle frontal gyrus, right, superior bank of gyrus	72.3406	21.209	0.00947463	2.69377	76.6591
2	SFG-l	superior frontal gyrus, left, lateral bank of gyrus	77.111	19.8969	0.00888849	2.65028	75.6227
2	MFG-s	middle frontal gyrus, left, superior bank of gyrus	77.9575	19.6809	0	2.64598	75.5624
2	MFG-i	middle frontal gyrus, left, inferior bank of gyrus	76.7272	19.9964	0.00893296	2.65595	75.7909
2	SFG-m	superior frontal gyrus, right, medial bank of gyrus	73.66	20.8291	0.00465246	2.68044	76.3569
2	FPi	frontal pole, left, inferior aspect	76.5764	20.0358	0	2.65694	75.8193
2	FPm	frontal pole, left, medial aspect	73.9479	20.748	0.00463435	2.68	76.3641
2	FPi	frontal pole, right, inferior aspect	74.462	20.6047	0	2.67376	76.2246
2	FPm	frontal pole, right, medial aspect	74.9315	20.4756	0.00914704	2.67378	76.2437
2	FPi	frontal pole, left, inferior aspect	74.1056	20.7038	0	2.67602	76.3068
2	SFG-m	superior frontal gyrus, left, medial bank of gyrus	73.3345	20.9215	0.00467312	2.68345	76.4243
2	SFG-m	superior frontal gyrus, right, medial bank of gyrus	80.1028	19.1538	0.00427826	2.62756	75.0616
2	SFG-l	superior frontal gyrus, right, lateral bank of gyrus	70.6648	21.7119	0	2.70861	76.9955
2	SFG-l	superior frontal gyrus, left, lateral bank of gyrus	77.0356	19.9164	0.0044486	2.65356	75.7332
2	MOrG	medial orbital gyrus, left	73.8005	20.7894	0	2.68057	76.3743
2	IRoG	inferior rostral gyrus, right	75.658	20.279	0	2.67063	76.1601
2	orIFG	inferior frontal gyrus, orbital part, right	73.1494	20.9745	0	2.6884	76.6139
2	LOrG	lateral orbital gyrus, left	78.8143	19.4669	0	2.6428	75.441
2	CgGf-s	cingulate gyrus, frontal part, left, superior bank of gyrus	60.2159	25.4283	0.0113824	2.78834	78.7477
2	CgGf-s	cingulate gyrus, frontal part, right, superior bank of gyrus	76.4942	20.0573	0.00448009	2.66026	75.896
2	SFG-l	superior frontal gyrus, right, lateral bank of gyrus	75.7437	20.2561	0	2.66572	76.0012
2	MFG-i	middle frontal gyrus, left, inferior bank of gyrus	78.3448	19.5836	0	2.6408	75.4125
2	SIG	short insular gyri, right	78.6498	19.5076	0.0261438	2.6372	75.3492
2	HCd	head of caudate nucleus, right	73.9719	20.7413	0	2.67893	76.3608
2	MFG-s	middle frontal gyrus, right, superior bank of gyrus	74.8286	20.5038	0.0045798	2.67557	76.2953
2	MFG-i	middle frontal gyrus, right, inferior bank of gyrus	78.6292	19.5127	0	2.64146	75.4344
2	SFG-m	superior frontal gyrus, right, medial bank of gyrus	73.3585	20.9147	0.00467159	2.68502	76.5014
2	GRe	gyrus rectus, right	73.6292	20.8378	0	2.68097	76.3997
2	SFG-l	superior frontal gyrus, right, lateral bank of gyrus	77.9267	19.6886	0.00439773	2.64395	75.4961
2	MOrG	medial orbital gyrus, left	76.1275	20.154	0.00450167	2.65948	75.8738
2	MOrG	medial orbital gyrus, right	77.8376	19.7112	0	2.64383	75.4921
2	SRoG	superior rostral gyrus, left	73.9376	20.7509	0	2.67896	76.3438
2	SRoG	superior rostral gyrus, right	77.3783	19.8282	0.00885779	2.65226	75.6904
2	IRoG	inferior rostral gyrus, left	77.5977	19.7721	0.00441638	2.64797	75.5926
2	MFG-i	middle frontal gyrus, right, inferior bank of gyrus	74.27	20.658	0	2.67366	76.2231
2	orIFG	inferior frontal gyrus, orbital part, right	76.9294	19.9439	0.00445474	2.65445	75.7111
2	LOrG	lateral orbital gyrus, right	73.7491	20.8039	0.0139405	2.68364	76.4438
2	SFG-m	superior frontal gyrus, left, medial bank of gyrus	77.9609	19.68	0	2.64514	75.5053
2	SFG-l	superior frontal gyrus, left, lateral bank of gyrus	75.3461	20.363	0	2.67112	76.1639
2	SFG-m	superior frontal gyrus, left, medial bank of gyrus	75.1028	20.4289	0.0182523	2.66959	76.122
2	MFG-s	middle frontal gyrus, right, superior bank of gyrus	76.7032	20.0027	0	2.65749	75.8138
2	MFG-i	middle frontal gyrus, right, inferior bank of gyrus	72.7347	21.094	0.00471165	2.68756	76.5582
2	FP-s	frontal pole, right, superior aspect	76.4188	20.0771	0.00448451	2.65763	75.8378
2	FP-s	frontal pole, right, superior aspect	75.1542	20.415	0	2.66542	76.0143
2	HCd	head of caudate nucleus, left	73.1871	20.9637	0.00936505	2.68314	76.4349
2	Pu	putamen, left	72.2413	21.2381	0	2.69241	76.6751
2	SFG-m	superior frontal gyrus, left, medial bank of gyrus	78.5332	19.5366	0.0130913	2.64064	75.4077
2	SFG-m	superior frontal gyrus, right, medial bank of gyrus	71.9774	21.316	0.0142837	2.69332	76.6623
2	CgGf-s	cingulate gyrus, frontal part, right, superior bank of gyrus	75.401	20.3482	0	2.66898	76.1101
2	Pu	putamen, right	72.769	21.0841	0.00470943	2.6887	76.5572
2	MTG-i	middle temporal gyrus, right, inferior bank of gyrus	74.4825	20.5991	0	2.67967	76.3732
2	ITG-its	inferior temporal gyrus, right, bank of the its	73.1528	20.9735	0.00468472	2.6861	76.5134
2	ITG-mts	inferior temporal gyrus, right, bank of mts	68.9445	22.2537	0.00497067	2.72703	77.4776
2	MTG-s	middle temporal gyrus, right, superior bank of gyrus	73.5607	20.8572	0	2.68079	76.3916
2	MFG-s	middle frontal gyrus, left, superior bank of gyrus	76.6792	20.0089	0	2.65588	75.8035
2	POrG	posterior orbital gyrus, right	75.7094	20.2653	0	2.66674	76.0489
2	opIFG	inferior frontal gyrus, opercular part, left	78.3893	19.5724	0	2.64082	75.3983
2	Cu	cuneate nucleus, left	70.8465	21.6563	0.00483723	2.70912	77.0362
2	IO	inferior olivary complex, left	64.7019	23.7129	0	2.7605	78.1954
2	IO	inferior olivary complex, right	68.4818	22.404	0.00500425	2.73419	77.623
2	GiRt	gigantocellular group, left	71.6964	21.3996	0	2.70249	76.9049
2	GiRt	gigantocellular group, right	77.0562	19.9111	0	2.65505	75.7173
2	RaM	raphe nuclei of medulla	58.2111	26.3158	0	2.79302	78.686
2	Sp5	spinal trigeminal nucleus, left	69.8629	21.9611	0	2.71511	77.1967
2	Sp5	spinal trigeminal nucleus, right	63.5846	24.1296	0	2.77285	78.5679
2	8Ve	vestibular nuclei, left	71.1686	21.5582	0	2.70767	77.0851
2	8Ve	vestibular nuclei, right	66.7443	22.9873	0	2.74543	77.8809
2	Arc	arcuate nucleus of medulla, right	58.6977	26.1385	0	2.80698	79.1035
2	LIG	long insular gyri, left	77.1145	19.896	0	2.65159	75.6742
2	DTA	anterior group of nuclei, left	64.6813	23.7205	0	2.76238	78.1721
2	Dt	dentate nucleus, left	64.5374	23.7734	0.00531011	2.74993	77.9669
2	Ve-V	V	72.0082	21.3069	0	2.68912	76.4498
2	PV-VIIIB	VIIIB, left, paravermis	72.9027	21.0455	0	2.67859	76.2399
2	He-VI	VI, left, lateral hemisphere	79.8766	19.208	0.00429037	2.6202	74.8093
2	He-Crus I	Crus I, left, lateral hemisphere	72.6559	21.1169	0	2.67895	76.2019
2	CGS	central glial substance	65.6477	23.3713	0.0052203	2.74036	77.6488
2	Cu	cuneate nucleus, left	65.891	23.285	0	2.74991	77.918
2	Cu	cuneate nucleus, right	70.1097	21.8839	0	2.71392	77.1518
2	10	dorsal motor nucleus of the vagus, right	63.3071	24.2354	0	2.77065	78.3778
2	Gr	gracile nucleus, right	74.0679	20.7144	0	2.67436	76.1602
2	IO	inferior olivary complex, right	71.902	21.3384	0	2.69608	76.7669
2	CMRt	central medullary reticular group, left	64.4106	23.8202	0.00532056	2.75897	78.1771
2	CMRt	central medullary reticular group, right	66.3811	23.1131	0	2.74848	77.954
2	LMRt	lateral medullary reticular group, left	68.5846	22.3705	0.00499675	2.73013	77.4959
2	Sp5	spinal trigeminal nucleus, left	62.7416	24.4538	0.0109242	2.77457	78.4639
2	Sp5	spinal trigeminal nucleus, right	66.3468	23.125	0.00516529	2.74632	77.8949
2	Arc	arcuate nucleus of medulla, left	71.7889	21.372	0.00477373	2.698	76.7265
2	Cu	cuneate nucleus, left	65.1405	23.5532	0.0105219	2.76003	78.21
2	Cu	cuneate nucleus, right	58.7114	26.1207	0	2.80224	78.9192
2	10	dorsal motor nucleus of the vagus, left	73.5435	20.8621	0	2.6834	76.3944
2	10	dorsal motor nucleus of the vagus, right	70.5894	21.7351	0.00485484	2.71043	77.1006
2	Gr	gracile nucleus, right	66.9911	22.9026	0.00511561	2.73578	77.6199
2	12	hypoglossal nucleus, left	70.4524	21.7774	0	2.70844	77.0617
2	12	hypoglossal nucleus, right	69.1295	22.1941	0	2.72273	77.289
2	IO	inferior olivary complex, left	64.8766	23.649	0.00528234	2.76116	78.2624
2	IO	inferior olivary complex, right	70.1748	21.8636	0	2.71767	77.2343
2	CMRt	central medullary reticular group, left	56.5936	27.1043	0.0121109	2.82368	79.3772
2	CMRt	central medullary reticular group, right	76.1583	20.1458	0	2.66132	75.9128
2	LMRt	lateral medullary reticular group, left	67.5703	22.7063	0	2.73976	77.8366
2	LMRt	lateral medullary reticular group, right	65.4147	23.4545	0.00523889	2.75761	78.1851
2	Sp5	spinal trigeminal nucleus, left	71.4907	21.4611	0.00479363	2.70219	76.9264
2	Sp5	spinal trigeminal nucleus, right	69.2803	22.1458	0	2.72198	77.3073
2	CGS	central glial substance	71.4222	21.4817	0	2.69663	76.7667
2	Arc	arcuate nucleus of medulla, left	68.5435	22.3839	0	2.72618	77.4246
2	Cu	cuneate nucleus, left	70.1748	21.8636	0	2.71175	77.0571
2	10	dorsal motor nucleus of the vagus, left	67.7382	22.65	0	2.7341	77.6351
2	12	hypoglossal nucleus, left	64.3763	23.8328	0	2.76763	78.4332
2	12	hypoglossal nucleus, right	71.7923	21.3709	0	2.69924	76.887
2	IO	inferior olivary complex, left	67.3201	22.7907	0.00509061	2.74561	77.9437
2	IO	inferior olivary complex, right	66.0692	23.2222	0	2.74631	77.9296
2	GiRt	gigantocellular group, left	74.8663	20.4935	0	2.67316	76.1948
2	GiRt	gigantocellular group, right	72.4023	21.1909	0	2.69429	76.7121
2	LMRt	lateral medullary reticular group, left	67.7999	22.6294	0	2.73454	77.6635
2	RaM	raphe nuclei of medulla	69.647	22.0292	0	2.71731	77.1717
2	Sp5	spinal trigeminal nucleus, right	69.8458	21.9665	0	2.71355	77.0971
2	8Ve	vestibular nuclei, left	69.1741	22.1798	0.00495417	2.7228	77.3628
2	8Ve	vestibular nuclei, right	73.7183	20.8126	0	2.68254	76.4407
2	LMRt	lateral medullary reticular group, right	67.9472	22.5803	0	2.73516	77.6885
2	CMRt	central medullary reticular group, left	70.1268	21.8785	0	2.71578	77.2056
2	CMRt	central medullary reticular group, right	59.7533	25.6768	0	2.80135	78.9709
2	Gr	gracile nucleus, left	67.8684	22.6065	0	2.73485	77.6368
2	Gr	gracile nucleus, right	68.3825	22.4366	0.00501153	2.73702	77.7134
2	Arc	arcuate nucleus of medulla, left	61.2406	25.0532	0	2.77755	78.4379
2	8Co	cochlear nuclei, left	70.5346	21.752	0	2.71447	77.1269
2	10	dorsal motor nucleus of the vagus, left	73.5675	20.8553	0.00465831	2.6831	76.4179
2	10	dorsal motor nucleus of the vagus, right	63.7012	24.0854	0	2.76834	78.2171
2	Cu	cuneate nucleus, right	71.5422	21.4457	0.00479019	2.70002	76.8114
2	12	hypoglossal nucleus, left	64.0953	23.9373	0.00534674	2.76842	78.3849
2	12	hypoglossal nucleus, right	73.6155	20.8417	0	2.67985	76.3472
2	trIFG	inferior frontal gyrus, triangular part, right	71.8574	21.3516	0	2.7001	76.867
2	MFG-i	middle frontal gyrus, right, inferior bank of gyrus	70.5655	21.7425	0	2.71222	77.158
2	MTG-s	middle temporal gyrus, right, superior bank of gyrus	75.3633	20.3583	0	2.66945	76.0922
2	CgGf-s	cingulate gyrus, frontal part, right, superior bank of gyrus	65.3084	23.4927	0	2.7531	78.0372
2	He-Crus II	Crus II, left, lateral hemisphere	69.5031	22.0748	0	2.70607	76.8606
2	ITG-mts	inferior temporal gyrus, right, bank of mts	68.0603	22.5428	0	2.7328	77.6785
2	FuG-l	fusiform gyrus, right, lateral bank of gyrus	71.0658	21.5894	0	2.70995	77.1151
2	OTG-s	occipito-temporal gyrus, right, superior bank of gyrus	69.462	22.0879	0	2.7231	77.3899
2	FuG-its	fusiform gyrus, left, bank of the its	81.6278	18.7959	0.012595	2.61716	74.8138
2	He-Crus II	Crus II, right, lateral hemisphere	64.3592	23.8392	0	2.7493	77.696
2	He-Crus II	Crus II, right, lateral hemisphere	63.3002	24.2272	0	2.75275	77.7735
2	He-VIIB	VIIB, right, lateral hemisphere	66.9397	22.9202	0	2.7261	77.3242
2	He-VIIIA	VIIIA, right, lateral hemisphere	70.1714	21.8646	0	2.70084	76.7297
2	He-VIIIA	VIIIA, right, lateral hemisphere	73.9102	20.7586	0	2.67294	76.1052
2	He-VI	VI, right, lateral hemisphere	70.2742	21.8326	0	2.70149	76.7255
2	He-VI	VI, right, lateral hemisphere	69.3489	22.1239	0	2.70902	76.9301
2	He-Crus I	Crus I, right, lateral hemisphere	31.4531	45.5328	0.294182	2.6026	74.4096
2	He-Crus II	Crus II, right, lateral hemisphere	66.3571	23.1214	0	2.73424	77.5006
2	He-Crus I	Crus I, right, lateral hemisphere	70.0446	21.9042	0	2.70594	76.8358
2	He-Crus II	Crus II, right, lateral hemisphere	65.5312	23.4128	0	2.73908	77.5686
2	PV-IV	IV, right, paravermis	67.8615	22.6088	0	2.72223	77.1997
2	PV-V	V, right, paravermis	67.7999	22.6294	0.0101092	2.7197	77.1373
2	PV-IV	IV, right, paravermis	69.6539	22.0271	0	2.70499	76.837
2	PV-V	V, right, paravermis	67.8101	22.626	0	2.72193	77.2025
2	PV-VIIIA	VIIIA, right, paravermis	67.0048	22.8979	0	2.72858	77.2961
2	PV-IX	IX, right, paravermis	73.1905	20.9627	0	2.67658	76.184
2	PV-VIIIA	VIIIA, right, paravermis	68.3756	22.4389	0	2.71368	76.9994
2	PV-VIIIB	VIIIB, right, paravermis	68.6052	22.3638	0	2.71716	77.0759
2	PV-IX	IX, right, paravermis	29.013	46.1847	0.248051	2.61862	74.7171
2	PV-VI	VI, right, paravermis	67.4812	22.7363	0.00507846	2.72477	77.2718
2	PV-Crus I	Crus I, right, paravermis	70.2605	21.8369	0	2.69938	76.7077
2	PV-Crus II	Crus II, right, paravermis	69.5579	22.0574	0.00492684	2.71009	76.9894
2	PV-VIIB	VIIB, right, paravermis	70.3256	21.8167	0	2.69903	76.67
2	PV-VI	VI, right, paravermis	68.8485	22.2847	0	2.70906	76.8713
2	PV-Crus I	Crus I, right, paravermis	69.9554	21.9321	0	2.70391	76.779
2	PV-Crus II	Crus II, right, paravermis	72.0356	21.2988	0	2.69089	76.4964
2	PV-VIIB	VIIB, right, paravermis	69.1604	22.1842	0	2.70858	76.8586
2	Ve-III	III	71.5661	21.4385	0	2.69078	76.5234
2	Ve-IX	IX	71.2611	21.5302	0.00480908	2.69542	76.5771
2	Ve-III	III	65.4181	23.4533	0	2.74514	77.7365
2	Ve-IX	IX	69.3386	22.1272	0	2.71226	77.045
2	Ve-X	X	68.7286	22.3236	0	2.71833	77.1663
2	Ve-IV	IV	67.7896	22.6278	0	2.72341	77.2279
2	Ve-V	V	69.7121	22.0087	0	2.7093	76.916
2	Ve-VI	VI	67.3029	22.7965	0	2.72574	77.2284
2	Ve-IV	IV	64.904	23.6391	0	2.74557	77.6993
2	Ve-V	V	68.6909	22.3359	0	2.7176	77.1648
2	Ve-VI	VI	72.4743	21.1699	0	2.68196	76.2881
2	Ve-VIIAt	VIIAt	68.379	22.4377	0	2.71928	77.1652
2	Ve-VIIB	VIIB	65.2776	23.4985	0	2.74241	77.572
2	Ve-VIIIA	VIIIA	68.4167	22.4254	0	2.71774	77.0825
2	Ve-VIIIB	VIIIB	71.9157	21.3343	0	2.68919	76.432
2	Ve-VIIAt	VIIAt	71.172	21.5572	0.0048151	2.69272	76.5241
2	Ve-VIIB	VIIB	71.1515	21.5634	0	2.69662	76.6348
2	Ve-VIIIA	VIIIA	70.0617	21.8988	0	2.70847	76.9586
2	Ve-VIIIB	VIIIB	69.8663	21.9601	0.00490509	2.70682	76.9609
2	PV-V	V, left, paravermis	73.2008	20.9597	0.00468165	2.67948	76.224
2	PV-V	V, left, paravermis	72.1282	21.2714	0	2.68633	76.3793
2	PV-VI	VI, left, paravermis	72.9609	21.0287	0.0140911	2.67885	76.2249
2	PV-Crus I	Crus I, left, paravermis	65.8019	23.3113	0	2.73942	77.5635
2	PV-VI	VI, left, paravermis	70.7471	21.6867	0.00968804	2.69414	76.5439
2	PV-Crus I	Crus I, left, paravermis	68.451	22.4141	0	2.71482	77.0825
2	PV-IX	IX, left, paravermis	69.9829	21.9235	0	2.70833	76.9939
2	PV-X	X, left, paravermis	68.9239	22.2603	0	2.71067	76.9412
2	PV-VIIIB	VIIIB, left, paravermis	65.4249	23.4456	0.0104761	2.74066	77.5683
2	PV-IX	IX, left, paravermis	65.096	23.5694	0	2.74967	77.8729
2	PV-X	X, left, paravermis	67.7896	22.6328	0.00505536	2.7254	77.3362
2	PV-VIIB	VIIB, left, paravermis	69.133	22.193	0	2.71081	76.9955
2	PV-VIIIA	VIIIA, left, paravermis	67.6182	22.6902	0	2.72149	77.1705
2	PV-VIIB	VIIB, left, paravermis	70.1268	21.8785	0	2.69993	76.7306
2	PV-VIIIA	VIIIA, left, paravermis	66.6415	23.0227	0	2.72996	77.3722
2	He-VI	VI, left, lateral hemisphere	67.3475	22.7814	0	2.72523	77.2752
2	He-VIIB	VIIB, left, lateral hemisphere	70.5997	21.732	0	2.69939	76.683
2	He-VIIB	VIIB, left, lateral hemisphere	70.2193	21.8497	0	2.69936	76.6683
2	He-Crus I	Crus I, left, lateral hemisphere	63.4167	24.1881	0.0108079	2.7569	77.8595
2	He-Crus II	Crus II, left, lateral hemisphere	69.9966	21.9192	0.00489596	2.70075	76.7124
2	He-Crus I	Crus I, left, lateral hemisphere	67.3029	22.7965	0	2.72321	77.2125
2	He-Crus II	Crus II, left, lateral hemisphere	67.44	22.7501	0	2.72498	77.2814
2	He-Crus I	Crus I, left, lateral hemisphere	67.3681	22.7744	0	2.72443	77.2108
2	He-Crus II	Crus II, left, lateral hemisphere	79.4894	19.3016	0.0344902	2.62507	74.9047
2	MFG-i	middle frontal gyrus, right, inferior bank of gyrus	74.9109	20.4813	0.00914955	2.67357	76.2236
2	FPi	frontal pole, left, inferior aspect	73.8554	20.774	0	2.68193	76.3788
2	MFG-i	middle frontal gyrus, right, inferior bank of gyrus	76.6381	20.0197	0	2.65759	75.8328
2	PCLa-s	paracentral lobule, anterior part, left, superior bank of gyrus	74.7635	20.5216	0.00916758	2.67757	76.2827
2	PoG-sl	postcentral gyrus, left, superior lateral aspect of gyrus	77.231	19.866	0.00443734	2.65589	75.7325
2	SPL-s	superior parietal lobule, right, superior bank of gyrus	72.8547	21.0593	0	2.69145	76.6313
2	Pcu-i	precuneus, right, inferior lateral bank of gyrus	78.5504	19.5323	0.00872562	2.64001	75.3788
2	CgGp-s	cingulate gyrus, parietal part, left, superior bank of gyrus	75.9219	20.2085	0	2.66559	75.9869
2	CgGp-s	cingulate gyrus, parietal part, right, superior bank of gyrus	77.0699	19.9075	0	2.65547	75.7728
2	CgGp-i	cingulate gyrus, parietal part, right, inferior bank of gyrus	71.8849	21.3434	0	2.7012	76.8413
2	CgGr-s	cingulate gyrus, retrosplenial part, right, superior bank of gyrus	74.1775	20.6838	0	2.68054	76.3655
2	CgGr-i	cingulate gyrus, retrosplenial part, right, inferior bank of gyrus	69.2255	22.1634	0	2.72096	77.2747
2	MTG-i	middle temporal gyrus, left, inferior bank of gyrus	71.6827	21.4036	0.0047808	2.70337	76.9209
2	OTG-s	occipito-temporal gyrus, left, superior bank of gyrus	77.8341	19.712	0.0176118	2.6454	75.5186
2	OTG-i	occipito-temporal gyrus, left, inferior bank of gyrus	71.1857	21.5531	0	2.70637	76.9785
2	MTG-i	middle temporal gyrus, left, inferior bank of gyrus	72.6765	21.111	0	2.69517	76.6866
2	MTG-i	middle temporal gyrus, right, inferior bank of gyrus	70.2707	21.8337	0	2.71116	77.0734
2	ITG-its	inferior temporal gyrus, right, bank of the its	74.0233	20.7269	0	2.68346	76.4676
2	LiG-pest	lingual gyrus, right, peristriate	72.9918	21.0198	0.00469506	2.69338	76.6636
2	OTG-i	occipito-temporal gyrus, right, inferior bank of gyrus	75.3633	20.3583	0.00909463	2.67016	76.1417
2	MTG-s	middle temporal gyrus, left, superior bank of gyrus	72.3852	21.1959	0.0094688	2.69466	76.6892
2	LiG-pest	lingual gyrus, left, peristriate	75.2639	20.3852	0.00455332	2.669	76.108
2	LiG-str	lingual gyrus, left, striate	74.1295	20.6971	0.00462299	2.68042	76.3473
2	CgGr-i	cingulate gyrus, retrosplenial part, left, inferior bank of gyrus	73.9376	20.7509	0	2.68717	76.5353
2	CgGr-i	cingulate gyrus, retrosplenial part, right, inferior bank of gyrus	71.7581	21.3812	0	2.70246	76.903
2	AnG-i	angular gyrus, right, inferior bank of gyrus	70.4249	21.7859	0.00486618	2.71406	77.0996
2	STG-i	superior temporal gyrus, right, inferior bank of gyrus	73.0637	20.9991	0.00469043	2.68678	76.4958
2	PoG-il	postcentral gyrus, left, inferior lateral aspect of gyrus	75.8088	20.2387	0	2.66485	75.9907
2	PoG-pcs	postcentral gyrus, left, bank of the posterior central sulcus	77.5771	19.7774	0.00883509	2.6498	75.6244
2	PTG	paraterminal gyrus, right	75.3667	20.3574	0	2.67083	76.1503
2	PaOG	parolfactory gyri, left	75.7814	20.246	0	2.66598	75.9896
2	HCd	head of caudate nucleus, left	69.4483	22.0923	0	2.72048	77.2541
2	Pu	putamen, left	72.9369	21.0356	0	2.68757	76.4896
2	PrG-sl	precentral gyrus, left, superior lateral aspect of gyrus	74.8801	20.4897	0.00457666	2.67615	76.2785
2	Pu	putamen, right	73.5709	20.8543	0	2.68179	76.3877
2	GPe	globus pallidus, external segment, right	72.6628	21.1149	0.00471631	2.69395	76.6825
2	Pu	putamen, left	69.7738	21.9892	0	2.7175	77.2071
2	GPe	globus pallidus, external segment, left	73.6635	20.8281	0	2.68058	76.3025
2	GPe	globus pallidus, external segment, left	70.2365	21.8444	0	2.71707	77.1942
2	BCd	body of caudate nucleus, left	72.2824	21.2261	0	2.69542	76.6842
2	BCd	body of caudate nucleus, right	69.3866	22.1119	0	2.72131	77.2954
2	HCd	head of caudate nucleus, right	69.414	22.1032	0	2.7184	77.1763
2	Pu	putamen, right	75.6991	20.268	0.0181086	2.66299	75.94
2	PrG-cs	precentral gyrus, left, bank of the central sulcus	77.0425	19.9146	0.0088964	2.65555	75.7845
2	PoG-cs	postcentral gyrus, left, bank of the central sulcus	67.7553	22.6443	0.00505791	2.73759	77.6935
2	PoG-sl	postcentral gyrus, left, superior lateral aspect of gyrus	72.1247	21.2725	0.0047515	2.69951	76.7715
2	HCd	head of caudate nucleus, left	68.7834	22.3058	0	2.72359	77.3533
2	Pu	putamen, left	74.1741	20.6847	0	2.67566	76.2252
2	Acb	nucleus accumbens, left	68.9788	22.2426	0.0049682	2.72429	77.265
2	ATZ	amygdalohippocampal transition zone, left	72.9575	21.0296	0.00939452	2.68998	76.5772
2	PoG-sl	postcentral gyrus, right, superior lateral aspect of gyrus	78.9753	19.4272	0.00867867	2.63816	75.3144
2	Pu	putamen, left	73.5744	20.8533	0	2.68173	76.3607
2	STG-i	superior temporal gyrus, right, inferior bank of gyrus	74.4997	20.5943	0	2.67819	76.3107
2	MTG-s	middle temporal gyrus, right, superior bank of gyrus	73.6566	20.83	0	2.68453	76.4938
2	ITG-l	inferior temporal gyrus, right, lateral bank of gyrus	71.9637	21.3201	0	2.69383	76.6337
2	SPL-s	superior parietal lobule, right, superior bank of gyrus	76.2097	20.1322	0	2.66516	76.016
2	AnG-s	angular gyrus, right, superior bank of gyrus	70.1439	21.8732	0	2.71766	77.1999
2	STG-l	superior temporal gyrus, left, lateral bank of gyrus	77.3338	19.8396	0	2.65137	75.6686
2	STG-i	superior temporal gyrus, left, inferior bank of gyrus	77.8718	19.7025	0	2.64837	75.5828
2	ITG-l	inferior temporal gyrus, left, lateral bank of gyrus	69.2358	22.1601	0	2.7249	77.3904
2	ITG-mts	inferior temporal gyrus, left, bank of mts	75.6169	20.2901	0.00906413	2.66974	76.1324
2	SPL-s	superior parietal lobule, left, superior bank of gyrus	73.9136	20.7576	0	2.68519	76.5127
2	SMG-i	supramarginal gyrus, left, inferior bank of gyrus	71.7855	21.373	0	2.69838	76.7979
2	ITG-its	inferior temporal gyrus, right, bank of the its	71.8197	21.3628	0	2.69966	76.7965
2	PCLa-s	paracentral lobule, anterior part, left, superior bank of gyrus	68.4339	22.4198	0.00500776	2.72548	77.3767
2	PCLa-i	paracentral lobule, anterior part, left, inferior bank of gyrus	73.3071	20.9294	0.0140246	2.68834	76.5585
2	PCLa-s	paracentral lobule, anterior part, right, superior bank of gyrus	74.1364	20.6952	0.00924513	2.6805	76.403
2	PCLa-i	paracentral lobule, anterior part, right, inferior bank of gyrus	69.0987	22.204	0	2.72518	77.379
2	CgGf-s	cingulate gyrus, frontal part, left, superior bank of gyrus	73.6875	20.8213	0	2.68581	76.5091
2	CgGf-i	cingulate gyrus, frontal part, left, inferior bank of gyrus	76.9191	19.9465	0	2.65693	75.8212
2	CgGf-s	cingulate gyrus, frontal part, right, superior bank of gyrus	75.939	20.204	0	2.66526	75.9962
2	CgGf-i	cingulate gyrus, frontal part, right, inferior bank of gyrus	72.6936	21.106	0	2.69474	76.7176
2	PrG-il	precentral gyrus, left, inferior lateral aspect of gyrus	71.1926	21.551	0	2.71029	77.1177
2	FuG-its	fusiform gyrus, right, bank of the its	69.0302	22.2261	0.0148935	2.72238	77.3118
2	IRoG	inferior rostral gyrus, right	72.8341	21.0653	0.00941044	2.68972	76.6151
2	orIFG	inferior frontal gyrus, orbital part, left	71.477	21.4652	0	2.70332	76.9621
2	STG-i	superior temporal gyrus, left, inferior bank of gyrus	75.4318	20.3398	0	2.66817	76.1103
2	MTG-s	middle temporal gyrus, left, superior bank of gyrus	78.5127	19.5417	0.00436491	2.64245	75.4684
2	MTG-s	middle temporal gyrus, right, superior bank of gyrus	75.5963	20.2956	0	2.66648	76.0768
2	TP-s	temporal pole, left, superior aspect	76.6244	20.0233	0.00447247	2.65743	75.848
2	ITG-its	inferior temporal gyrus, right, bank of the its	75.377	20.3546	0	2.66938	76.15
2	AnG-s	angular gyrus, left, superior bank of gyrus	77.3064	19.8466	0	2.65041	75.6411
2	PHG-l	parahippocampal gyrus, left, lateral bank of gyrus	78.2317	19.6119	0.00438059	2.64428	75.487
2	PHG-cos	parahippocampal gyrus, left, bank of the cos	75.7985	20.2414	0	2.6652	76.0487
2	STG-i	superior temporal gyrus, right, inferior bank of gyrus	74.9349	20.4747	0	2.6717	76.165
2	IOG-s	inferior occipital gyrus, right, superior bank of gyrus	79.1193	19.3919	0.00433144	2.63596	75.2943
2	SOG-i	superior occipital gyrus, right, inferior bank of gyrus	69.7293	22.0032	0	2.71731	77.3004
2	SMG-i	supramarginal gyrus, left, inferior bank of gyrus	73.6669	20.8271	0.00465203	2.67967	76.3732
2	LiG-str	lingual gyrus, right, striate	74.2358	20.6675	0	2.67329	76.2061
2	IOG-i	inferior occipital gyrus, right, inferior bank of gyrus	76.7478	19.9911	0	2.65875	75.8508
2	PoG-cs	postcentral gyrus, left, bank of the central sulcus	76.9328	19.943	0	2.65373	75.7271
2	PCLa-s	paracentral lobule, anterior part, left, superior bank of gyrus	74.0816	20.7106	0	2.67878	76.3841
2	PCLa-s	paracentral lobule, anterior part, right, superior bank of gyrus	77.4846	19.801	0	2.65005	75.6395
2	CgGf-s	cingulate gyrus, frontal part, left, superior bank of gyrus	72.1453	21.2664	0	2.69712	76.8143
2	AnG-s	angular gyrus, right, superior bank of gyrus	79.2666	19.3558	0.00432339	2.63582	75.2923
2	PrG-cs	precentral gyrus, right, bank of the central sulcus	74.4722	20.6019	0	2.67829	76.3309
2	SPL-s	superior parietal lobule, left, superior bank of gyrus	77.2481	19.8616	0	2.65179	75.6835
2	LIG	long insular gyri, right	75.682	20.2726	0	2.66704	76.064
2	BCd	body of caudate nucleus, right	75.5312	20.3131	0.00453721	2.66338	76.0056
2	Pu	putamen, right	77.0151	19.9217	0.00889957	2.64985	75.6571
2	IOG-s	inferior occipital gyrus, left, superior bank of gyrus	78.828	19.4635	0.00434745	2.63867	75.3552
2	IOG-i	inferior occipital gyrus, left, inferior bank of gyrus	74.5031	20.5934	0.00919963	2.67583	76.2716
2	PHG-l	parahippocampal gyrus, left, lateral bank of gyrus	71.8643	21.3495	0	2.69927	76.8674
2	PHG-cos	parahippocampal gyrus, left, bank of the cos	72.5668	21.1429	0.0094451	2.69396	76.7665
2	SOG-i	superior occipital gyrus, left, inferior bank of gyrus	74.8012	20.5113	0	2.67542	76.279
2	IOG-i	inferior occipital gyrus, left, inferior bank of gyrus	76.6175	20.025	0	2.65774	75.8266
2	DTLv	lateral group of nuclei, left, ventral division	74.0713	20.7134	0.0138799	2.67723	76.3088
2	DTLv	lateral group of nuclei, right, ventral division	77.6594	19.7564	0.00441287	2.64276	75.4398
2	DTLv	lateral group of nuclei, right, ventral division	76.5764	20.0358	0	2.65705	75.8146
2	ITG-its	inferior temporal gyrus, left, bank of the its	74.085	20.7096	0	2.67917	76.3642
2	FuG-l	fusiform gyrus, left, lateral bank of gyrus	73.9822	20.7384	0	2.68203	76.4752
2	FuG-cos	fusiform gyrus, left, bank of cos	74.9657	20.4663	0	2.67225	76.207
2	SOG-s	superior occipital gyrus, left, superior bank of gyrus	79.6299	19.2675	0	2.63229	75.2149
2	AnG-i	angular gyrus, right, inferior bank of gyrus	71.7615	21.3801	0	2.70096	76.881
2	AnG-i	angular gyrus, right, inferior bank of gyrus	74.5236	20.5877	0	2.67689	76.3371
2	Cun-str	cuneus, right, striate	73.3276	20.9235	0	2.68395	76.5003
2	HG	Heschl's gyrus, left	75.8876	20.2177	0	2.66362	75.9792
2	LIG	long insular gyri, left	75.1474	20.4168	0	2.67001	76.1378
2	Pu	putamen, left	77.8855	19.699	0.00440005	2.64689	75.5507
2	PLP	planum polare, right	75.9184	20.2095	0	2.66365	75.9911
2	MPB	medial parabrachial nucleus,right	67.4537	22.7455	0.00508053	2.73629	77.667
2	MPB	medial parabrachial nucleus, left	65.8293	23.3068	0	2.75148	77.9982
2	LPB	lateral parabrachial nucleus, left	69.695	22.0141	0.00983429	2.71711	77.1839
2	LC	locus ceruleus, right	69.9315	21.9396	0	2.71917	77.2882
2	PRF	pontine reticular formation, left	60.401	25.4014	0	2.80258	79.1189
2	PRF	pontine reticular formation, right	71.6073	21.4262	0.00478583	2.70309	76.9021
2	Pn	pontine nuclei, right	67.7073	22.6603	0.0050615	2.73052	77.5099
2	Pn	pontine nuclei, left	70.3393	21.8124	0.00487211	2.71407	77.135
2	MBRa	midbrain raphe nuclei	69.414	22.1032	0	2.72606	77.449
2	CGMB	central gray substance of midbrain, right	77.3235	19.8422	0.00886407	2.65108	75.6472
2	CGMB	central gray substance of midbrain, left	78.379	19.575	0	2.64135	75.4347
2	CGPo	central gray of the pons, left	60.0994	25.5289	0	2.8072	79.212
2	CGPo	central gray of the pons, right	67.6456	22.681	0.0101322	2.74263	77.7901
2	Pn	pontine nuclei, right	76.0281	20.1803	0.0090151	2.66324	75.9216
2	Pn	pontine nuclei, left	75.915	20.2104	0	2.66262	75.9134
2	MBRa	midbrain raphe nuclei	77.5771	19.7774	0	2.65003	75.6336
2	PRF	pontine reticular formation, right	73.6772	20.8242	0.00465138	2.68561	76.4876
2	PRF	pontine reticular formation, left	67.2892	22.8011	0	2.73728	77.6739
2	MPB	medial parabrachial nucleus,right	69.3626	22.1196	0.00494071	2.72583	77.4158
2	MPB	medial parabrachial nucleus, left	75.1234	20.4233	0	2.66717	76.0522
2	LC	locus ceruleus, right	70.4284	21.7848	0	2.71509	77.2149
2	LC	locus ceruleus, left	73.2351	20.9499	0	2.68854	76.5782
2	LPB	lateral parabrachial nucleus, left	75.305	20.3741	0	2.67036	76.1694
2	Pr5	principal sensory nucleus of trigeminal nerve, right	71.8883	21.3424	0	2.6963	76.7417
2	Pr5	principal sensory nucleus of trigeminal nerve, left	74.5134	20.5905	0.00459918	2.67854	76.3122
2	Mo5	motor nucleus of trigeminal nerve, left	69.1741	22.1798	0.029725	2.71756	77.1681
2	Pn	pontine nuclei, right	74.0541	20.7182	0	2.67924	76.3311
2	Pn	pontine nuclei, left	70.0514	21.9021	0	2.71353	77.0811
2	Mo5	motor nucleus of trigeminal nerve, right	67.6559	22.6775	0	2.73756	77.6519
2	SOC	superior olivary complex, right	66.3057	23.1393	0.00516849	2.7459	77.8602
2	SOC	superior olivary complex, left	73.8999	20.7615	0	2.67878	76.2741
2	PRF	pontine reticular formation, right	67.8718	22.6054	0.00504923	2.72948	77.4766
2	SubC	nucleus subceruleus, right	68.4202	22.4242	0	2.73328	77.6036
2	SubC	nucleus subceruleus, left	68.3276	22.4546	0	2.73004	77.5621
2	MPB	medial parabrachial nucleus, left	80.6854	19.0155	0.0127421	2.6229	74.9381
2	LC	locus ceruleus, left	78.3242	19.5887	0.00875082	2.64196	75.4423
2	IO	inferior olivary complex, left	64.1981	23.8883	0	2.75552	78.0069
2	IO	inferior olivary complex, right	70.0034	21.9171	0.00979096	2.70896	76.9737
2	Arc	arcuate nucleus of medulla, right	72.3681	21.2009	0	2.69581	76.7374
2	8Co	cochlear nuclei, left	69.8218	21.9741	0.00490822	2.71213	77.0455
2	8Ve	vestibular nuclei, right	70.61	21.7288	0	2.69957	76.7472
2	8Ve	vestibular nuclei, left	73.3687	20.9118	0	2.68861	76.545
2	Sp5	spinal trigeminal nucleus, right	65.538	23.4104	0	2.75455	78.0713
2	Sp5	spinal trigeminal nucleus, left	61.7204	24.8584	0	2.78245	78.649
2	RaM	raphe nuclei of medulla	72.9541	21.0306	0	2.6864	76.4813
2	GiRt	gigantocellular group, right	63.6566	24.1023	0	2.76835	78.3477
2	GiRt	gigantocellular group, left	71.7478	21.3842	0	2.69605	76.7104
2	Arc	arcuate nucleus of medulla, left	72.3201	21.215	0	2.69053	76.5443
2	Pn	pontine nuclei, right	77.7039	19.7451	0.00882068	2.6448	75.4853
2	Pn	pontine nuclei, left	79.2803	19.3525	0.00432264	2.63113	75.1344
2	7	facial motor nucleus, right	71.902	21.3384	0	2.70195	76.8791
2	7	facial motor nucleus, left	73.05	21.003	0.0187652	2.68824	76.5076
2	8Ve	vestibular nuclei, right	64.7944	23.6791	0	2.75645	78.1129
2	RaM	raphe nuclei of medulla	67.4949	22.7317	0.00507743	2.72961	77.4448
2	GiRt	gigantocellular group, right	74.0062	20.7317	0	2.67892	76.3025
2	GiRt	gigantocellular group, left	74.9863	20.4607	0	2.67198	76.1893
2	7	facial motor nucleus, left	61.4531	24.961	0.00557662	2.77593	78.3936
2	6	abducens nucleus, right	66.7375	22.9896	0	2.74182	77.7865
2	6	abducens nucleus, left	73.379	20.9088	0	2.68345	76.4403
2	8Ve	vestibular nuclei, left	74.1021	20.7048	0	2.67974	76.3545
2	Sp5	spinal trigeminal nucleus, right	63.7114	24.0815	0	2.77026	78.446
2	Sp5	spinal trigeminal nucleus, left	63.804	24.0466	0.0161134	2.77124	78.4604
2	Pn	pontine nuclei, right	67.7896	22.6328	0	2.73307	77.5865
2	Pn	pontine nuclei, left	74.2015	20.6771	0.00461851	2.67875	76.3216
2	SOC	superior olivary complex, right	71.8506	21.3536	0	2.69878	76.8118
2	SOC	superior olivary complex, left	68.7629	22.3075	0	2.72159	77.3479
2	PRF	pontine reticular formation, right	62.4058	24.5854	0	2.78606	78.7644
2	PRF	pontine reticular formation, left	74.1947	20.679	0	2.67567	76.2209
2	RPn	pontine raphe nucleus	69.5579	22.0574	0	2.72084	77.3134
2	SubC	nucleus subceruleus, right	73.2488	20.946	0	2.68934	76.5632
2	SubC	nucleus subceruleus, left	73.0637	20.9991	0	2.69039	76.593
2	LMRt	lateral medullary reticular group, right	62.255	24.6394	0	2.77718	78.4593
2	SO	supraoptic nucleus, right	74.952	20.47	0.00457226	2.66783	76.0526
2	SNC	substantia nigra, pars compacta, left	54.9486	27.9157	0	2.83754	79.6967
2	SNR	substantia nigra, pars reticulata, left	55.915	27.4271	0	2.82549	79.4825
2	SNR	substantia nigra, pars reticulata, right	54.1364	28.2965	0	2.83255	79.4819
2	3	oculomotor nuclear complex, right	58.3139	26.3105	0	2.80996	79.0733
2	SNC	substantia nigra, pars compacta, right	64.1056	23.9335	0	2.77669	78.514
2	EW	Edinger-Westphal nucleus, right	63.2522	24.2564	0	2.77205	78.3857
2	EW	Edinger-Westphal nucleus, left	62.1796	24.6748	0	2.78369	78.5856
2	SC	superior colliculus, left	69.2118	22.1678	0	2.72925	77.4995
2	SC	superior colliculus, right	66.5627	23.05	0	2.7517	77.9888
2	PTec	pretectal region	66.2509	23.1585	0	2.75154	78.0581
2	RN	red nucleus, right	63.7423	24.0699	0	2.76895	78.3919
2	RN	red nucleus, left	59.5579	25.761	0.00575407	2.80679	79.1259
2	Dk	nucleus of Darkschewitsch, left	70.3838	21.7986	0	2.71763	77.3061
2	ICjl	interstitial nucleus of Cajal, right	62.207	24.6639	0	2.77865	78.5127
2	ICjl	interstitial nucleus of Cajal, left	64.4517	23.805	0	2.76099	78.2221
2	CGMB	central gray substance of midbrain, right	66.2886	23.1453	0	2.75291	78.086
2	CGMB	central gray substance of midbrain, left	68.5161	22.3928	0	2.73045	77.4845
2	IC	inferior colliculus, left	60.7951	25.2368	0	2.79197	78.8606
2	4	trochlear nucleus, right	54.085	28.3614	0	2.8416	79.7159
2	4	trochlear nucleus, left	63.1494	24.2959	0	2.77431	78.4476
2	SubCn	subcuneiform nucleus, right	55.3838	27.7025	0	2.82988	79.501
2	CnF	cuneiform nucleus, right	65.3564	23.4754	0	2.75609	78.0982
2	SubCn	subcuneiform nucleus, left	58.5367	26.2104	0.00585446	2.81039	79.1751
2	CnF	cuneiform nucleus, left	62.721	24.4618	0	2.77766	78.5564
2	MBRa	midbrain raphe nuclei	62.56	24.5248	0.0164339	2.78561	78.6834
2	SNR	substantia nigra, pars reticulata, right	49.1364	31.0434	0	2.8782	80.2627
2	SNC	substantia nigra, pars compacta, right	51.83	29.5887	0	2.85797	80.0249
2	SNR	substantia nigra, pars reticulata, left	47.3715	32.1566	0	2.88837	80.4068
2	SNC	substantia nigra, pars compacta, left	64.7841	23.6828	0	2.76212	78.1836
2	VTA	ventral tegmental area, left	63.5915	24.1216	0.00538909	2.76929	78.3785
2	RN	red nucleus, left	60.0034	25.5697	0	2.78935	78.7685
2	3	oculomotor nuclear complex, right	65.3975	23.4607	0.0104805	2.75241	77.9549
2	CGMB	central gray substance of midbrain, left	65.1885	23.5306	0	2.75871	78.172
2	Pn	pontine nuclei, left	72.4914	21.1648	0	2.69582	76.7388
2	Pn	pontine nuclei, right	73.379	20.9088	0.00467028	2.68238	76.3614
2	MBRa	midbrain raphe nuclei	68.5675	22.376	0.02499	2.73388	77.5341
2	IC	inferior colliculus, left	68.2488	22.4805	0	2.73364	77.6448
2	SNR	substantia nigra, pars reticulata, right	69.7361	22.0011	0	2.72206	77.3593
2	SNC	substantia nigra, pars compacta, right	65.3221	23.4877	0	2.76198	78.2215
2	SNR	substantia nigra, pars reticulata, left	62.3681	24.6003	0	2.78783	78.831
2	SNC	substantia nigra, pars compacta, left	66.9225	22.9261	0.0102417	2.74648	77.8851
2	VTA	ventral tegmental area, right	66.4393	23.0928	0	2.74844	77.973
2	VTA	ventral tegmental area, left	70.0034	21.9171	0.0146864	2.7197	77.3276
2	4	trochlear nucleus, right	63.7663	24.0608	0	2.76601	78.2237
2	4	trochlear nucleus, left	56.1652	27.2866	0.0122033	2.82342	79.3429
2	SubCn	subcuneiform nucleus, right	53.9068	28.4552	0	2.85253	79.9848
2	CnF	cuneiform nucleus, right	63.1905	24.2801	0	2.77784	78.5255
2	SubCn	subcuneiform nucleus, left	58.7217	26.1278	0	2.81439	79.2327
2	CnF	cuneiform nucleus, left	72.5874	21.1369	0	2.70036	76.8736
2	CGMB	central gray substance of midbrain, right	68.1186	22.5235	0	2.74028	77.7846
2	CGMB	central gray substance of midbrain, left	63.4373	24.1856	0	2.77873	78.6079
2	RN	red nucleus, left	81.4702	18.8323	0	2.61085	74.5743
2	DTM	medial group of nuclei, left	76.7683	19.9857	0	2.65256	75.6592
2	Sb	subthalamic nucleus, left	70.9527	21.6238	0.00482998	2.70279	76.8373
2	R	reticular nucleus of thalamus, left	73.3927	20.9049	0.00466941	2.68129	76.336
2	ILr	rostral group of intralaminar nuclei, left	74.9315	20.4756	0	2.67317	76.2069
2	DTA	anterior group of nuclei, left	68.1323	22.519	0	2.72254	77.3233
2	HCd	head of caudate nucleus, left	80.5586	19.0454	0	2.62061	74.8838
2	ILc	caudal group of intralaminar nuclei, right	64.2324	23.8863	0.016006	2.76818	78.2955
2	RN	red nucleus, right	75.8944	20.2158	0	2.65982	75.7929
2	DTA	anterior group of nuclei, right	84.5236	18.152	0.00405449	2.58734	74.0625
2	SNR	substantia nigra, pars reticulata, right	84.8458	18.083	0.0040391	2.58813	74.0215
2	R	reticular nucleus of thalamus, right	77.183	19.8783	0	2.64734	75.5048
2	ILr	rostral group of intralaminar nuclei, right	77.0836	19.904	0	2.65416	75.7107
2	DTA	anterior group of nuclei, right	76.4496	20.069	0	2.65911	75.8247
2	BLA	basolateral nucleus, left	69.8149	21.9762	0	2.71228	77.0706
2	DG	dentate gyrus, left	80.5209	19.0543	0	2.62108	74.8416
2	CA4	CA4 field, left	77.745	19.7346	0.004408	2.64923	75.5699
2	CA2	CA2 field, left	74.1912	20.6799	0.00461915	2.68239	76.4293
2	CA1	CA1 field, left	71.5422	21.4457	0	2.69981	76.8197
2	S	subiculum, left	70.8739	21.6479	0	2.71302	77.1212
2	LGd	dorsal lateral geniculate nucleus, left	76.5045	20.0546	0	2.65755	75.76
2	TCd	tail of caudate nucleus, left	74.0644	20.7153	0	2.67283	76.1318
2	DG	dentate gyrus, left	79.0062	19.4196	0	2.63044	75.0856
2	CA4	CA4 field, left	86.3845	17.7609	0	2.57225	73.6132
2	CA3	CA3 field, left	75.7505	20.2543	0	2.66273	75.8877
2	CA1	CA1 field, left	75.2981	20.3759	0	2.66911	76.0506
2	S	subiculum, left	81.8472	18.7456	0	2.61089	74.6078
2	DTP	posterior group of nuclei, right	62.8239	24.4109	0.00545494	2.7707	78.3317
2	LGd	dorsal lateral geniculate nucleus, right	91.3468	16.7961	0.0487713	2.53097	72.5645
2	CA1	CA1 field, right	75.1474	20.4168	0	2.67051	76.0992
2	SNR	substantia nigra, pars reticulata, right	71.9945	21.3109	0	2.6925	76.5719
2	SNC	substantia nigra, pars compacta, right	78.5984	19.5204	0	2.63884	75.3423
2	RN	red nucleus, right	78.523	19.5391	0	2.63739	75.2495
2	LGd	dorsal lateral geniculate nucleus, right	81.854	18.744	0	2.60656	74.4766
2	TCd	tail of caudate nucleus, right	73.732	20.8087	0	2.68846	76.5375
2	DG	dentate gyrus, right	76.645	20.0179	0.00894254	2.65192	75.6018
2	CA4	CA4 field, right	82.769	18.5368	0	2.6007	74.3728
2	CA3	CA3 field, right	77.4229	19.8167	0.00442635	2.65352	75.6565
2	CA2	CA2 field, right	89.5511	17.1329	0.0153075	2.54975	73.0402
2	CA1	CA1 field, right	90.3016	16.9905	0.0531309	2.54138	72.8089
2	S	subiculum, right	76.3228	20.1024	0	2.66245	75.9222
2	LA	lateral nucleus, left	82.0562	18.6978	0	2.61029	74.6871
2	COMA	cortico-medial group, left	83.6532	18.3408	0	2.59647	74.2705
2	BMA	basomedial nucleus, left	75.0171	20.4523	0	2.67275	76.2209
2	GPe	globus pallidus, external segment, left	81.7443	18.7691	0	2.6101	74.6004
2	Cl	claustrum, right	71.5901	21.4313	0	2.70448	76.9296
2	GPi	globus pallidus, internal segment, right	67.6251	22.6879	0	2.73413	77.5673
2	GPe	globus pallidus, external segment, right	79.3317	19.3399	0	2.63499	75.2808
2	DG	dentate gyrus, left	83.074	18.4687	0	2.59751	74.2321
2	CA1	CA1 field, left	70.2365	21.8444	0	2.70965	76.9943
2	S	subiculum, left	78.7971	19.4711	0	2.64276	75.4257
2	TCd	tail of caudate nucleus, right	78.9993	19.4213	0	2.634	75.1614
2	DG	dentate gyrus, right	83.3722	18.4027	0.00822098	2.59465	74.1668
2	CA4	CA4 field, right	78.4955	19.546	0.0174634	2.64158	75.3872
2	CA3	CA3 field, right	82.7347	18.5444	0	2.60164	74.3572
2	CA2	CA2 field, right	73.4304	20.8942	0	2.68366	76.3937
2	CA1	CA1 field, right	93.3345	16.4384	0.290068	2.51861	72.2296
2	S	subiculum, right	74.9109	20.4813	0	2.67267	76.1207
2	Cl	claustrum, left	73.3825	20.9079	0	2.68895	76.5593
2	HCd	head of caudate nucleus, right	69.8424	21.9676	0.00490677	2.71562	77.1766
2	PrG-sl	precentral gyrus, left, superior lateral aspect of gyrus	72.5942	21.1349	0	2.69067	76.6166
2	orIFG	inferior frontal gyrus, orbital part, left	70.4455	21.7795	0	2.70975	77.1307
2	opIFG	inferior frontal gyrus, opercular part, left	66.6038	23.0358	0.00514536	2.73659	77.6306
2	CgGr-i	cingulate gyrus, retrosplenial part, left, inferior bank of gyrus	66.6073	23.0346	0	2.74253	77.8108
2	MTG-i	middle temporal gyrus, left, inferior bank of gyrus	68.6258	22.3571	0	2.72423	77.4528
2	Pu	putamen, left	69.6265	22.0357	0.00492199	2.71847	77.243
2	MTG-s	middle temporal gyrus, left, superior bank of gyrus	66.6004	23.0369	0	2.74037	77.779
2	MTG-s	middle temporal gyrus, right, superior bank of gyrus	68.5332	22.3872	0	2.72813	77.4631
2	MFG-i	middle frontal gyrus, left, inferior bank of gyrus	72.6971	21.105	0	2.69276	76.6809
2	CgGf-s	cingulate gyrus, frontal part, right, superior bank of gyrus	74.8801	20.4897	0.00457666	2.67024	76.1437
2	CgGf-i	cingulate gyrus, frontal part, right, inferior bank of gyrus	68.965	22.2471	0	2.72331	77.4462
2	SPL-s	superior parietal lobule, right, superior bank of gyrus	66.0692	23.2222	0.025935	2.74551	77.8823
2	SPL-i	superior parietal lobule, right, inferior bank of gyrus	70.5517	21.7419	0.00485743	2.71096	77.1185
2	PoG-cs	postcentral gyrus, right, bank of the central sulcus	71.2543	21.5323	0	2.70596	76.9706
2	PoG-pcs	postcentral gyrus, right, bank of the posterior central sulcus	69.5374	22.064	0.00492829	2.71727	77.2567
2	SMG-s	supramarginal gyrus, right, superior bank of gyrus	68.8862	22.2725	0.0149246	2.72174	77.404
2	SMG-i	supramarginal gyrus, right, inferior bank of gyrus	67.4709	22.7397	0	2.73599	77.6394
2	SMG-i	supramarginal gyrus, right, inferior bank of gyrus	73.5093	20.8718	0	2.68614	76.5461
2	SPL-i	superior parietal lobule, left, inferior bank of gyrus	63.1905	24.2746	0	2.76495	78.3029
2	Pcu-i	precuneus, left, inferior lateral bank of gyrus	69.2289	22.1623	0	2.72252	77.3587
2	SOG-s	superior occipital gyrus, right, superior bank of gyrus	65.5106	23.4202	0	2.75335	78.0353
2	LiG-pest	lingual gyrus, right, peristriate	67.0151	22.8944	0	2.73731	77.6747
2	OTG-i	occipito-temporal gyrus, right, inferior bank of gyrus	65.5175	23.4177	0.00523067	2.74475	77.8477
2	IOG-i	inferior occipital gyrus, right, inferior bank of gyrus	70.9424	21.6221	0	2.70587	77.0065
2	IOG-i	inferior occipital gyrus, right, inferior bank of gyrus	67.8787	22.6031	0	2.73148	77.5449
2	Cun-pest	cuneus, left, peristriate	69.0747	22.2117	0	2.71852	77.1892
2	Cun-str	cuneus, left, striate	69.5545	22.0585	0.0246354	2.71677	77.2442
2	Pu	putamen, left	70.3324	21.8145	0	2.70794	77.0156
2	GPe	globus pallidus, external segment, left	68.3825	22.4366	0	2.73381	77.576
2	GPi	globus pallidus, internal segment, left	70.5278	21.7541	0	2.71003	77.0556
2	SPL-i	superior parietal lobule, left, inferior bank of gyrus	66.83	22.9527	0	2.73718	77.7078
2	AnG-i	angular gyrus, left, inferior bank of gyrus	69.2529	22.1546	0	2.72386	77.3986
2	ITG-its	inferior temporal gyrus, left, bank of the its	68.4099	22.4276	0	2.72397	77.4022
2	FuG-its	fusiform gyrus, left, bank of the its	68.9856	22.2404	0.00496771	2.72537	77.4248
2	FuG-l	fusiform gyrus, left, lateral bank of gyrus	73.8725	20.7692	0	2.67996	76.3891
2	FuG-cos	fusiform gyrus, right, bank of cos	72.9027	21.0455	0	2.6915	76.6717
2	PHG-l	parahippocampal gyrus, right, lateral bank of gyrus	67.584	22.7017	0	2.73691	77.6574
2	MTG-i	middle temporal gyrus, left, inferior bank of gyrus	70.8122	21.6667	0.0145187	2.70826	77.0474
2	ITG-its	inferior temporal gyrus, left, bank of the its	64.8869	23.6453	0	2.74995	78.0488
2	ITG-mts	inferior temporal gyrus, left, bank of mts	69.7121	22.0087	0.00983187	2.72001	77.3264
2	FuG-its	fusiform gyrus, left, bank of the its	63.8759	24.0142	0	2.76354	78.3388
2	Pcu-s	precuneus, right, superior lateral bank of gyrus	66.5696	23.0476	0.00514801	2.74055	77.7911
2	ITG-its	inferior temporal gyrus, right, bank of the its	66.5045	23.0702	0.0103061	2.74387	77.8221
2	FuG-its	fusiform gyrus, right, bank of the its	70.2605	21.832	0	2.71302	77.1474
2	STG-i	superior temporal gyrus, left, inferior bank of gyrus	66.1583	23.1909	0	2.74454	77.8839
2	MTG-s	middle temporal gyrus, left, superior bank of gyrus	65.353	23.4767	0.00524384	2.75193	78.0191
2	STG-i	superior temporal gyrus, left, inferior bank of gyrus	73.2659	20.9411	0	2.6893	76.5615
2	SOG-s	superior occipital gyrus, left, superior bank of gyrus	68.5744	22.3738	0	2.72298	77.3894
2	SOG-i	superior occipital gyrus, left, inferior bank of gyrus	69.8424	21.9676	0	2.71779	77.2454
2	MTG-s	middle temporal gyrus, right, superior bank of gyrus	69.3729	22.1163	0	2.72196	77.3466
2	TG	transverse gyri, right	70.7334	21.6909	0.00484496	2.71068	77.0883
2	STG-i	superior temporal gyrus, right, inferior bank of gyrus	69.7121	22.0087	0	2.71991	77.2927
2	PoG-pcs	postcentral gyrus, left, bank of the posterior central sulcus	70.7231	21.694	0.00484567	2.71108	77.1306
2	SMG-s	supramarginal gyrus, left, superior bank of gyrus	73.6977	20.8184	0	2.68187	76.4297
2	STG-l	superior temporal gyrus, left, lateral bank of gyrus	70.7848	21.6751	0	2.70553	76.9151
2	Cun-pest	cuneus, right, peristriate	64.7875	23.6816	0	2.7547	78.0669
2	Cun-str	cuneus, right, striate	68.8897	22.2714	0.00497463	2.71983	77.2927
2	LiG-pest	lingual gyrus, right, peristriate	67.7964	22.6305	0	2.72967	77.5187
2	PrG-cs	precentral gyrus, left, bank of the central sulcus	72.5017	21.1618	0	2.69703	76.7653
2	PoG-sl	postcentral gyrus, left, superior lateral aspect of gyrus	73.2385	20.9489	0.00467924	2.68823	76.535
2	PoG-il	postcentral gyrus, left, inferior lateral aspect of gyrus	71.0864	21.5832	0.0144627	2.70467	76.9162
2	Cun-pest	cuneus, left, peristriate	73.6977	20.8184	0	2.68243	76.4065
2	LiG-str	lingual gyrus, left, striate	68.4818	22.404	0	2.72861	77.4613
2	IOG-s	inferior occipital gyrus, left, superior bank of gyrus	66.2577	23.1561	0	2.74067	77.7806
2	IOG-i	inferior occipital gyrus, left, inferior bank of gyrus	71.7855	21.373	0.00954791	2.69818	76.7643
2	PCLa-i	paracentral lobule, anterior part, left, inferior bank of gyrus	69.4859	22.0803	0.00493194	2.71942	77.2535
2	PCLa-i	paracentral lobule, anterior part, right, inferior bank of gyrus	73.0946	20.9902	0	2.69007	76.5995
2	LiG-pest	lingual gyrus, left, peristriate	64.3043	23.8542	0	2.76018	78.1453
2	LiG-str	lingual gyrus, left, striate	67.4503	22.7365	0.00508078	2.73118	77.5428
2	LiG-str	lingual gyrus, right, striate	69.1638	22.1831	0	2.72137	77.3212
2	CgGf-s	cingulate gyrus, frontal part, right, superior bank of gyrus	72.1213	21.2735	0.00475172	2.70037	76.8872
2	FP-s	frontal pole, left, superior aspect	71.8814	21.3445	0.00476758	2.69451	76.7416
2	MFG-s	middle frontal gyrus, left, superior bank of gyrus	74.5168	20.5896	0	2.67635	76.2999
2	MTG-i	middle temporal gyrus, right, inferior bank of gyrus	76.7443	19.992	0.00893096	2.65604	75.8322
2	PrG-il	precentral gyrus, left, inferior lateral aspect of gyrus	73.8657	20.7711	0	2.68358	76.4936
2	PoG-sl	postcentral gyrus, right, superior lateral aspect of gyrus	73.708	20.8155	0	2.6833	76.4771
2	Cl	claustrum, left	66.0384	23.233	0	2.75069	77.9909
2	BLA	basolateral nucleus, left	68.2077	22.4941	0	2.72785	77.4696
2	DG	dentate gyrus, right	73.2762	20.9382	0	2.67829	76.1998
2	ZI	zona incerta, right	64.7464	23.6966	0	2.7594	78.1985
2	BMA	basomedial nucleus, left	60.6785	25.2852	0	2.78982	78.7453
2	DTM	medial group of nuclei, right	62.3578	24.6043	0	2.77834	78.5356
2	Sb	subthalamic nucleus, right	55.2228	27.7647	0.00620578	2.82816	79.5011
2	DTM	medial group of nuclei, left	62.3064	24.6246	0	2.77572	78.5349
2	Dt	dentate nucleus, right	64.0987	23.9361	0	2.76267	78.2108
2	Dt	dentate nucleus, right	65.281	23.5025	0	2.75733	78.1571
2	Emb	emboliform nucleus, right	61.9465	24.7676	0	2.77737	78.5719
2	Glo	globose nucleus, right	59.8286	25.6444	0.0114561	2.7947	78.8749
2	Fas	fastigial nucleus, right	59.3831	25.831	0	2.7927	78.8236
2	Dt	dentate nucleus, left	57.9267	26.4746	0	2.80851	79.1341
2	SFG-l	superior frontal gyrus, left, lateral bank of gyrus	69.5202	22.0694	0.00492951	2.71909	77.3286
2	MFG-s	middle frontal gyrus, left, superior bank of gyrus	70.7814	21.6762	0	2.71046	77.1241
2	FPi	frontal pole, left, inferior aspect	67.841	22.6157	0	2.73288	77.5096
2	MTG-i	middle temporal gyrus, left, inferior bank of gyrus	73.9171	20.7566	0	2.68323	76.4402
2	ITG-mts	inferior temporal gyrus, left, bank of mts	76.1206	20.1558	0.00450207	2.66056	75.9045
2	ITG-l	inferior temporal gyrus, right, lateral bank of gyrus	70.5826	21.7372	0	2.71167	77.1449
2	ITG-l	inferior temporal gyrus, right, lateral bank of gyrus	72.5942	21.1349	0.00944153	2.6932	76.6631
2	FuG-its	fusiform gyrus, right, bank of the its	73.074	20.9961	0.00937954	2.6884	76.6169
2	ITG-mts	inferior temporal gyrus, right, bank of mts	71.7683	21.3781	0	2.70013	76.8899
2	PoG-il	postcentral gyrus, right, inferior lateral aspect of gyrus	76.4119	20.0789	0	2.66335	75.9765
2	STG-i	superior temporal gyrus, right, inferior bank of gyrus	76.0007	20.1876	0.00450918	2.66009	75.9287
2	PLT	planum temporale, right	73.1974	20.9607	0	2.68657	76.5435
2	SFG-l	superior frontal gyrus, left, lateral bank of gyrus	69.9349	21.9386	0	2.71693	77.2691
2	SFG-l	superior frontal gyrus, right, lateral bank of gyrus	72.1042	21.2785	0	2.69895	76.8131
2	MFG-s	middle frontal gyrus, right, superior bank of gyrus	75.0617	20.4401	0.00456558	2.67418	76.2282
2	SFG-l	superior frontal gyrus, right, lateral bank of gyrus	77.4812	19.8018	0	2.65177	75.6759
2	TP-s	temporal pole, right, superior aspect	72.6662	21.1139	0	2.69143	76.6595
2	GRe	gyrus rectus, left	72.5565	21.1459	0	2.69564	76.7708
2	GRe	gyrus rectus, right	75.0788	20.4355	0.00912909	2.67514	76.2931
2	MOrG	medial orbital gyrus, left	74.0302	20.7249	0	2.68003	76.3933
2	MOrG	medial orbital gyrus, right	73.2077	20.9578	0.00936242	2.68919	76.6327
2	MFG-i	middle frontal gyrus, left, inferior bank of gyrus	75.9287	20.2067	0.0090269	2.66556	76.0639
2	fro	frontal operculum, left	73.3173	20.9264	0	2.68689	76.5397
2	SCG	subcallosal cingulate gyrus, left	73.8725	20.7692	0	2.68333	76.4678
2	SCG	subcallosal cingulate gyrus, left	75.2125	20.3991	0	2.67236	76.223
2	SCG	subcallosal cingulate gyrus, right	73.4339	20.8932	0	2.68738	76.5457
2	SFG-l	superior frontal gyrus, left, lateral bank of gyrus	68.6806	22.3392	0	2.72661	77.4518
2	MFG-s	middle frontal gyrus, left, superior bank of gyrus	73.5127	20.8708	0.00466179	2.68569	76.5114
2	CgGf-s	cingulate gyrus, frontal part, left, superior bank of gyrus	69.2324	22.1612	0	2.72185	77.3792
2	MFG-s	middle frontal gyrus, right, superior bank of gyrus	73.5469	20.8611	0	2.68336	76.4617
2	MFG-i	middle frontal gyrus, left, inferior bank of gyrus	76.3057	20.1069	0	2.66002	75.8683
2	GRe	gyrus rectus, left	70.0583	21.8999	0	2.71731	77.2547
2	GRe	gyrus rectus, right	74.7635	20.5216	0	2.67331	76.259
2	MOrG	medial orbital gyrus, right	73.8794	20.7672	0	2.68528	76.4783
2	LOrG	lateral orbital gyrus, right	72.2927	21.223	0	2.69484	76.7284
2	CgGf-i	cingulate gyrus, frontal part, left, inferior bank of gyrus	75.8773	20.2204	0	2.66287	75.9404
2	CgGf-i	cingulate gyrus, frontal part, right, inferior bank of gyrus	73.4133	20.8991	0.0093362	2.68284	76.4766
2	SRoG	superior rostral gyrus, left	71.7649	21.3791	0	2.69921	76.8319
2	IRoG	inferior rostral gyrus, left	76.7409	19.9929	0	2.65602	75.7726
2	GRe	gyrus rectus, right	71.9157	21.3343	0	2.69957	76.853
2	MFG-i	middle frontal gyrus, right, inferior bank of gyrus	77.2584	19.8589	0.0133073	2.65271	75.6835
2	LOrG	lateral orbital gyrus, right	78.098	19.6454	0	2.64401	75.4792
2	trIFG	inferior frontal gyrus, triangular part, left	72.841	21.0633	0.00940955	2.69155	76.6657
2	trIFG	inferior frontal gyrus, triangular part, left	73.6463	20.8329	0	2.68049	76.3924
2	SFG-m	superior frontal gyrus, left, medial bank of gyrus	76.4633	20.0654	0	2.66092	75.9007
2	SFG-m	superior frontal gyrus, right, medial bank of gyrus	74.6333	20.5574	0	2.67366	76.2522
2	MFG-s	middle frontal gyrus, right, superior bank of gyrus	74.438	20.6114	0.00460384	2.67575	76.2867
2	MFG-i	middle frontal gyrus, right, inferior bank of gyrus	78.1186	19.6403	0	2.64593	75.5232
2	trIFG	inferior frontal gyrus, triangular part, right	75.915	20.2104	0	2.66379	75.9997
2	fro	frontal operculum, right	74.8698	20.4925	0.00457729	2.67608	76.3112
2	SIG	short insular gyri, right	69.4791	22.0825	0.00493243	2.72259	77.4279
2	PoG-sl	postcentral gyrus, left, superior lateral aspect of gyrus	73.9308	20.7528	0.00463542	2.68219	76.4283
2	PoG-il	postcentral gyrus, left, inferior lateral aspect of gyrus	69.366	22.1185	0.00494047	2.72039	77.3821
2	HG	Heschl's gyrus, left	71.9328	21.3292	0	2.6993	76.8273
2	PLT	planum temporale, left	68.5093	22.3951	0	2.72866	77.5341
2	PrG-prc	precentral gyrus, right, bank of the precentral sulcus	73.9959	20.7345	0	2.68333	76.4952
2	PrG-sl	precentral gyrus, right, superior lateral aspect of gyrus	72.8547	21.0593	0	2.69274	76.676
2	PoG-cs	postcentral gyrus, right, bank of the central sulcus	73.6772	20.8242	0	2.68332	76.4241
2	PoG-sl	postcentral gyrus, right, superior lateral aspect of gyrus	73.4887	20.8776	0	2.68418	76.5065
2	PrG-cs	precentral gyrus, left, bank of the central sulcus	70.7711	21.6793	0	2.7094	77.1027
2	PCLa-s	paracentral lobule, anterior part, left, superior bank of gyrus	73.2214	20.9539	0	2.69145	76.6534
2	PCLa-i	paracentral lobule, anterior part, left, inferior bank of gyrus	76.4222	20.0762	0	2.65698	75.7707
2	PoG-cs	postcentral gyrus, left, bank of the central sulcus	73.9445	20.7489	0	2.68228	76.4346
2	SPL-i	superior parietal lobule, right, inferior bank of gyrus	76.1241	20.1549	0	2.66419	75.9902
2	SMG-s	supramarginal gyrus, right, superior bank of gyrus	74.9657	20.4663	0.00457143	2.67113	76.1612
2	SPL-i	superior parietal lobule, right, inferior bank of gyrus	73.3619	20.9137	0	2.68436	76.4771
2	GRe	gyrus rectus, left	71.6073	21.4262	0	2.70709	77.063
2	orIFG	inferior frontal gyrus, orbital part, left	74.3592	20.6332	0	2.67769	76.3622
2	PHG-cos	parahippocampal gyrus, right, bank of the cos	70.0308	21.9085	0.00489356	2.72045	77.3817
2	PLP	planum polare, left	74.0781	20.7115	0.0046262	2.67893	76.3923
2	CA3	CA3 field, right	68.3722	22.44	0	2.72743	77.4008
2	CA4	CA4 field, right	69.9246	21.9418	0	2.71253	77.0185
2	TCd	tail of caudate nucleus, right	67.7896	22.6328	0	2.73872	77.6756
2	BCd	body of caudate nucleus, right	64.7019	23.7129	0.00529661	2.76532	78.2327
2	ARH	arcuate nucleus of the hypothalamus, left	67.2858	22.8023	0	2.73847	77.7095
2	ARH	arcuate nucleus of the hypothalamus, right	55.3701	27.6536	0	2.834	79.5941
2	CA3	CA3 field, left	54.3968	28.1673	0	2.84537	79.7765
2	DTLv	lateral group of nuclei, left, ventral division	54.4962	28.1474	0	2.84419	79.8539
2	ATZ	amygdalohippocampal transition zone, right	85.4147	17.9626	0	2.57831	73.7649
2	PVH	paraventricular nucleus of the hypothalamus, left	70.6854	21.7056	0	2.70823	76.9888
2	PVH	paraventricular nucleus of the hypothalamus, right	75.3598	20.3593	0	2.66986	76.0992
2	LHA	lateral hypothalamic area, anterior region, left	73.66	20.8291	0	2.68602	76.5101
2	LHA	lateral hypothalamic area, anterior region, right	63.8074	24.0453	0.0107417	2.76971	78.2722
2	AHA	anterior hypothalamic area, left	68.2008	22.4964	0	2.73749	77.6584
2	AHA	anterior hypothalamic area, right	71.0589	21.5915	0	2.70942	77.0506
2	VMH	ventromedial hypothalamic nucleus, left	67.0391	22.8862	0.00511195	2.74879	77.8892
2	VMH	ventromedial hypothalamic nucleus, right	71.5422	21.4457	0.00479019	2.70512	76.9006
2	LA	lateral nucleus, right	68.4647	22.4097	0	2.72922	77.4568
2	PrOR	preoptic region, left	65.2125	23.5115	0	2.76041	78.1084
2	PrOR	preoptic region, right	68.9376	22.2509	0.00497117	2.71823	77.1337
2	SO	supraoptic nucleus, left	67.4914	22.7277	0	2.73852	77.6383
2	DTLd	lateral group of nuclei, right, dorsal division	71.7855	21.373	0.00477395	2.70119	76.8264
2	S	subiculum, right	69.1467	22.1886	0.00495614	2.72777	77.4705
2	CA1	CA1 field, right	62.9541	24.3713	0	2.77181	78.328
2	CA2	CA2 field, right	67.0596	22.8792	0	2.74063	77.6825
2	R	reticular nucleus of thalamus, left	53.9239	28.4334	0	2.84644	79.8226
2	MTG-i	middle temporal gyrus, right, inferior bank of gyrus	85.9013	17.8608	0.0438841	2.57687	73.7577
2	SOG-s	superior occipital gyrus, right, superior bank of gyrus	70.9013	21.6395	0	2.70489	76.866
2	BCd	body of caudate nucleus, right	58.7183	26.1177	0.00583635	2.80415	78.9549
2	DTA	anterior group of nuclei, right	67.4503	22.7467	0.00508078	2.74277	77.8015
2	DTM	medial group of nuclei, right	65.2262	23.5223	0	2.75506	78.0129
2	ILr	rostral group of intralaminar nuclei, right	69.9109	21.9461	0	2.71585	77.142
2	ILc	caudal group of intralaminar nuclei, right	73.7731	20.7971	0	2.6828	76.4289
2	R	reticular nucleus of thalamus, right	70.2159	21.8507	0	2.71156	77.043
2	DTM	medial group of nuclei, right	59.5613	25.7537	0	2.80194	78.9716
2	BCd	body of caudate nucleus, left	71.878	21.3455	0.00476781	2.70075	76.8358
2	DTA	anterior group of nuclei, left	69.7293	22.0032	0.00491473	2.71891	77.2647
2	DTM	medial group of nuclei, left	69.7601	21.9935	0	2.71584	77.1845
2	ILr	rostral group of intralaminar nuclei, left	71.7066	21.3965	0	2.70084	76.8662
2	ILc	caudal group of intralaminar nuclei, left	68.026	22.5542	0	2.73733	77.6558
2	R	reticular nucleus of thalamus, left	71.6381	21.417	0.00478377	2.70237	76.9104
2	ZI	zona incerta, left	60.7642	25.2496	0	2.79881	78.9378
2	DTM	medial group of nuclei, left	63.1494	24.2959	0	2.77523	78.4424
2	Acb	nucleus accumbens, left	68.8177	22.2897	0	2.73102	77.5673
2	SptN	septal nuclei, left	64.719	23.7066	0	2.75971	78.0526
2	SptN	septal nuclei, right	69.6436	22.0303	0	2.72223	77.3291
2	SI	substantia innominata, left	66.4188	23.0999	0	2.75122	77.9713
2	SI	substantia innominata, right	68.6532	22.3481	0.00499176	2.72929	77.4913
2	BLA	basolateral nucleus, right	68.3242	22.4557	0	2.73581	77.5795
2	BMA	basomedial nucleus, right	72.9198	21.0405	0	2.69011	76.5714
2	COMA	cortico-medial group, right	67.2858	22.8023	0	2.74017	77.6953
2	CA1	CA1 field, left	70.5141	21.7584	0	2.70544	76.9299
2	CA2	CA2 field, left	59.7944	25.6591	0	2.79796	78.7934
2	CA4	CA4 field, left	62.7793	24.4391	0	2.77516	78.4886
2	DG	dentate gyrus, left	63.5504	24.1264	0	2.75903	77.9164
2	TCd	tail of caudate nucleus, left	66.8163	22.9625	0	2.74061	77.6609
2	DTA	anterior group of nuclei, right	70.538	21.751	0.00485838	2.71636	77.2125
2	DTLv	lateral group of nuclei, right, ventral division	61.0212	25.1432	0	2.78814	78.7276
2	DTP	posterior group of nuclei, right	69.4894	22.0792	0.0049317	2.72648	77.4277
2	ILr	rostral group of intralaminar nuclei, right	68.9822	22.2415	0.00496796	2.72659	77.4315
2	LGd	dorsal lateral geniculate nucleus, right	61.6621	24.8819	0	2.77676	78.4429
2	MG	medial geniculate complex, right	70.5586	21.7446	0.00485696	2.71625	77.2157
2	R	reticular nucleus of thalamus, right	70.4078	21.7912	0	2.71247	77.0762
2	MG	medial geniculate complex, right	68.9719	22.2449	0	2.73268	77.5726
2	S	subiculum, left	66.4907	23.0749	0	2.74558	77.9078
2	BCd	body of caudate nucleus, left	68.7903	22.3036	0	2.71953	77.1792
2	DTLd	lateral group of nuclei, left, dorsal division	67.3338	22.786	0	2.74052	77.8228
2	ILr	rostral group of intralaminar nuclei, left	67.8136	22.6248	0	2.7341	77.6859
2	IRoG	inferior rostral gyrus, right	71.573	21.4364	0.0191525	2.70062	76.8297
2	fro	frontal operculum, right	71.3023	21.5178	0.00961261	2.70206	76.8738
2	AnG-i	angular gyrus, left, inferior bank of gyrus	70.6408	21.7193	0.00485131	2.70905	77.0454
2	MTG-s	middle temporal gyrus, left, superior bank of gyrus	70.2742	21.8326	0	2.71073	77.1052
2	MTG-i	middle temporal gyrus, left, inferior bank of gyrus	73.523	20.8679	0	2.68373	76.4829
2	MTG-s	middle temporal gyrus, left, superior bank of gyrus	71.974	21.317	0	2.69505	76.699
2	ITG-l	inferior temporal gyrus, right, lateral bank of gyrus	69.0953	22.2051	0.00991965	2.72457	77.4077
2	Pcu-s	precuneus, left, superior lateral bank of gyrus	68.66	22.3459	0.00499127	2.72421	77.3879
2	Pcu-i	precuneus, left, inferior lateral bank of gyrus	67.4332	22.7525	0	2.73778	77.6746
2	Pcu-s	precuneus, right, superior lateral bank of gyrus	67.7073	22.6603	0.0050615	2.73283	77.5673
2	AnG-i	angular gyrus, right, inferior bank of gyrus	71.6484	21.4139	0	2.70345	76.9259
2	MTG-i	middle temporal gyrus, right, inferior bank of gyrus	69.2289	22.1623	0	2.72027	77.2518
2	ITG-mts	inferior temporal gyrus, right, bank of mts	70.0583	21.8999	0	2.71599	77.2524
2	Pcu-i	precuneus, right, inferior lateral bank of gyrus	69.2255	22.1634	0.0049505	2.72249	77.3406
2	Cun-pest	cuneus, left, peristriate	66.9911	22.9026	0	2.73984	77.7416
2	LiG-pest	lingual gyrus, left, peristriate	73.2968	20.9323	0	2.68929	76.5463
2	LiG-str	lingual gyrus, left, striate	70.6477	21.7172	0.0145525	2.70703	76.9495
2	LiG-str	lingual gyrus, right, striate	72.135	21.2694	0	2.69574	76.6841
2	CgGr-i	cingulate gyrus, retrosplenial part, right, inferior bank of gyrus	69.0747	22.2117	0.0049613	2.72322	77.3438
2	ITG-its	inferior temporal gyrus, right, bank of the its	68.1974	22.4975	0	2.73031	77.5171
2	LiG-pest	lingual gyrus, right, peristriate	69.8732	21.9579	0	2.71779	77.2462
2	OTG-s	occipito-temporal gyrus, right, superior bank of gyrus	71.806	21.3669	0.00477259	2.69935	76.7636
2	OTG-i	occipito-temporal gyrus, right, inferior bank of gyrus	75.8876	20.2177	0	2.66413	75.9632
2	ITG-its	inferior temporal gyrus, left, bank of the its	72.6936	21.106	0	2.69339	76.6846
2	ITG-l	inferior temporal gyrus, left, lateral bank of gyrus	70.6032	21.7309	0	2.71237	77.0848
2	PrG-il	precentral gyrus, right, inferior lateral aspect of gyrus	70.3633	21.805	0.00487045	2.71266	77.1057
2	PrG-cs	precentral gyrus, right, bank of the central sulcus	70.4352	21.7827	0.00486547	2.71366	77.1312
2	PoG-cs	postcentral gyrus, right, bank of the central sulcus	69.7567	21.9946	0	2.71589	77.1694
2	PoG-sl	postcentral gyrus, right, superior lateral aspect of gyrus	70.7985	21.6709	0.00484051	2.70931	77.0415
2	PrG-prc	precentral gyrus, left, bank of the precentral sulcus	74.9452	20.4719	0	2.67056	76.1481
2	HG	Heschl's gyrus, right	74.9143	20.4803	0	2.67441	76.1737
2	PLP	planum polare, right	73.1631	20.9705	0.0187362	2.68744	76.5454
2	LIG	long insular gyri, right	68.5572	22.3794	0	2.7272	77.4567
2	Pu	putamen, right	75.9116	20.2113	0.00451447	2.66295	75.9246
2	GPe	globus pallidus, external segment, right	72.6765	21.111	0.00471542	2.69183	76.6177
2	SFG-m	superior frontal gyrus, left, medial bank of gyrus	71.0178	21.604	0	2.70731	77.0274
2	SFG-m	superior frontal gyrus, right, medial bank of gyrus	71.0555	21.5926	0	2.70596	76.9678
2	CgGf-s	cingulate gyrus, frontal part, left, superior bank of gyrus	68.7629	22.3125	0.0049838	2.72246	77.3468
2	CgGf-i	cingulate gyrus, frontal part, left, inferior bank of gyrus	70.6066	21.7298	0	2.71136	77.0963
2	CgGf-s	cingulate gyrus, frontal part, right, superior bank of gyrus	71.0315	21.5998	0	2.70593	76.9946
2	CgGf-i	cingulate gyrus, frontal part, right, inferior bank of gyrus	66.3914	23.1095	0	2.74637	77.8625
2	BCd	body of caudate nucleus, left	73.9102	20.7586	0.00463671	2.67833	76.2952
2	BCd	body of caudate nucleus, right	73.1289	20.9804	0	2.68947	76.5778
2	cc	corpus callosum	69.1364	22.187	0	2.71794	77.1666
2	PrG-prc	precentral gyrus, left, bank of the precentral sulcus	76.7958	19.9786	0.00446249	2.65574	75.8599
2	AnG-i	angular gyrus, right, inferior bank of gyrus	72.6045	21.1319	0	2.69493	76.7666
2	PHG-cos	parahippocampal gyrus, right, bank of the cos	72.3509	21.2059	0.00473664	2.69938	76.8616
2	Cun-str	cuneus, left, striate	73.8314	20.7807	0	2.67977	76.3985
2	PoG-il	postcentral gyrus, right, inferior lateral aspect of gyrus	73.9959	20.7345	0	2.68194	76.4819
2	AnG-s	angular gyrus, left, superior bank of gyrus	75.4901	20.3241	0	2.66984	76.1491
2	DTLv	lateral group of nuclei, right, ventral division	72.2447	21.2371	0	2.69682	76.8381
2	BCd	body of caudate nucleus, right	71.2234	21.5416	0	2.70001	76.8489
2	GPi	globus pallidus, internal segment, left	69.7875	21.9849	0.0147319	2.71715	77.2221
2	DTLv	lateral group of nuclei, right, ventral division	72.8513	21.0603	0	2.69146	76.6235
2	DTLv	lateral group of nuclei, right, ventral division	72.9404	21.0346	0.00469836	2.68996	76.6483
2	DTLv	lateral group of nuclei, left, ventral division	75.1679	20.4112	0	2.66996	76.146
2	PHG-l	parahippocampal gyrus, right, lateral bank of gyrus	74.6984	20.5395	0	2.67369	76.223
2	GPe	globus pallidus, external segment, right	76.2097	20.1322	0.00449681	2.66254	75.9464
2	FuG-cos	fusiform gyrus, right, bank of cos	72.44	21.1799	0.00946163	2.69425	76.7755
2	PHG-cos	parahippocampal gyrus, right, bank of the cos	76.854	19.9634	0	2.65755	75.8522
2	DTLd	lateral group of nuclei, right, dorsal division	72.2241	21.2432	0	2.69979	76.87
2	DTLd	lateral group of nuclei, right, dorsal division	74.4757	20.601	0	2.67795	76.3335
2	SptN	septal nuclei, right	65.2193	23.5195	0	2.74614	77.7172
2	CeA	central nucleus, right	64.2118	23.8939	0	2.76528	78.2781
2	Pa	paraventricular nuclei, right of thalamus, right	68.8897	22.2664	0	2.72589	77.4057
2	DTA	anterior group of nuclei, left	67.8273	22.6203	0	2.7307	77.4441
2	DTLv	lateral group of nuclei, left, ventral division	63.6532	24.1036	0	2.76621	78.3248
2	DTM	medial group of nuclei, right	73.6189	20.8407	0	2.68573	76.4867
2	Pa	paraventricular nuclei, left of thalamus, left	67.6594	22.6764	0	2.73499	77.5583
2	ZI	zona incerta, left	70.8053	21.6688	0	2.70808	76.9523
2	SNC	substantia nigra, pars compacta, left	71.0418	21.5967	0	2.70815	77.0325
2	DTM	medial group of nuclei, left	77.4366	19.8132	0.00442556	2.64891	75.5829
2	Sb	subthalamic nucleus, left	73.732	20.8087	0.00929584	2.67923	76.3124
2	SNR	substantia nigra, pars reticulata, right	63.8348	24.035	0	2.76491	78.1819
2	CA2	CA2 field, right	59.414	25.8176	0	2.79937	78.8312
2	CA4	CA4 field, right	70.233	21.8454	0	2.70973	76.952
2	COMA	cortico-medial group, left	74.4174	20.6171	0	2.67313	76.1536
2	CeA	central nucleus, left	68.4373	22.4186	0.00500751	2.7351	77.6169
2	CA3	CA3 field, left	73.6189	20.8407	0.00465506	2.67938	76.2624
2	GPi	globus pallidus, internal segment, right	72.1385	21.2684	0.00950119	2.69447	76.6764
2	R	reticular nucleus of thalamus, right	70.5175	21.7573	0	2.71336	77.123
2	PVH	paraventricular nucleus of the hypothalamus, left	70.5243	21.7552	0	2.71286	77.1098
2	LHM	lateral hypothalamic area, mammillary region, left	73.4476	20.8893	0	2.68363	76.4059
2	PVH	paraventricular nucleus of the hypothalamus, right	74.8629	20.4944	0.00457771	2.67091	76.1395
2	LHM	lateral hypothalamic area, mammillary region, right	66.1926	23.1789	0	2.75808	78.1325
2	MB	mammillary body, left	66.926	22.9249	0.00512059	2.74026	77.7169
2	PHA	posterior hypothalamic area, left	70.9082	21.6374	0	2.71447	77.1821
2	MB	mammillary body, right	65.6648	23.3652	0	2.75147	77.9264
2	PHA	posterior hypothalamic area, right	68.6498	22.3492	0	2.72955	77.4427
2	DTA	anterior group of nuclei, right	64.4894	23.7911	0	2.76495	78.2868
2	S	subiculum, right	65.867	23.2934	0.00520291	2.75652	78.1311
2	CA1	CA1 field, right	73.7526	20.8029	0	2.68119	76.328
2	TCd	tail of caudate nucleus, right	73.9136	20.7576	0.009273	2.68312	76.4193
2	BLA	basolateral nucleus, right	75.3667	20.3574	0.00454711	2.66656	75.9881
2	BMA	basomedial nucleus, right	74.6127	20.5631	0	2.67767	76.2525
2	COMA	cortico-medial group, right	66.0178	23.2402	0	2.7539	78.0133
3	MTG-i	middle temporal gyrus, left, inferior bank of gyrus	76.8522	43.7865	0.0133767	2.52712	70.3152
3	ITG-mts	inferior temporal gyrus, left, bank of mts	68.3332	49.2453	0.0200592	2.5624	71.2897
3	ITG-its	inferior temporal gyrus, left, bank of the its	67.9117	49.5509	0	2.56584	71.3678
3	MTG-s	middle temporal gyrus, left, superior bank of gyrus	68.9843	48.7805	0.00993493	2.55888	71.2053
3	STG-l	superior temporal gyrus, left, lateral bank of gyrus	67.1681	50.0995	0.0153053	2.57115	71.4786
3	MTG-i	middle temporal gyrus, left, inferior bank of gyrus	67.737	49.6788	0.0101179	2.56392	71.2916
3	SIG	short insular gyri, left	76.6843	43.8824	0.0178747	2.52968	70.4155
3	LIG	long insular gyri, left	65.6466	51.2606	0.00522002	2.57436	71.5749
3	PLP	planum polare, left	67.3497	49.9644	0.00508802	2.57163	71.48
3	STG-l	superior temporal gyrus, left, lateral bank of gyrus	71.1432	47.3002	0.0240836	2.55365	71.0439
3	PoG-il	postcentral gyrus, left, inferior lateral aspect of gyrus	72.202	46.6065	0.0759374	2.54729	70.8662
3	HCd	head of caudate nucleus, left	67.3463	49.9669	0	2.56936	71.4254
3	IRoG	inferior rostral gyrus, left	70.1837	47.9469	0.00976515	2.56211	71.2884
3	Acb	nucleus accumbens, left	71.6572	46.9609	0	2.55085	70.9399
3	Pu	putamen, left	70.1665	47.9586	0.063489	2.56322	71.2518
3	AnG-i	angular gyrus, left, inferior bank of gyrus	69.8924	48.1467	0	2.55823	71.174
3	Pcu-i	precuneus, left, inferior lateral bank of gyrus	63.618	52.8952	0.0161594	2.58366	71.8035
3	Pcu-s	precuneus, left, superior lateral bank of gyrus	70.9307	47.4419	0.00483115	2.55715	71.1032
3	PoG-pcs	postcentral gyrus, left, bank of the posterior central sulcus	64.4301	52.2285	0.0744602	2.57925	71.663
3	SPL-i	superior parietal lobule, left, inferior bank of gyrus	69.4024	48.4866	0.00493754	2.55683	71.1228
3	AnG-s	angular gyrus, left, superior bank of gyrus	69.9438	48.1113	0.00489932	2.55352	71.063
3	CgGp-s	cingulate gyrus, parietal part, left, superior bank of gyrus	66.8905	50.3074	0.0204918	2.57056	71.4691
3	SMG-s	supramarginal gyrus, left, superior bank of gyrus	64.8927	51.8562	0	2.57875	71.6578
3	PoG-pcs	postcentral gyrus, left, bank of the posterior central sulcus	69.3852	48.4986	0.0148163	2.55876	71.1785
3	FuG-its	fusiform gyrus, left, bank of the its	69.7382	48.2532	0.0294826	2.55643	71.1262
3	PCLa	paracentral lobule, anterior part, left	68.2236	49.3194	0.00502285	2.56673	71.3701
3	PrG-sl	precentral gyrus, left, superior lateral aspect of gyrus	72.3288	46.5248	0.0189511	2.5501	70.9518
3	FuG-its	fusiform gyrus, left, bank of the its	73.5728	45.7382	0.00465766	2.54107	70.718
3	ITG-mts	inferior temporal gyrus, left, bank of mts	71.246	47.232	0	2.54869	70.9366
3	PoG-cs	postcentral gyrus, left, bank of the central sulcus	64.6494	52.0513	0.0901092	2.58214	71.766
3	PrG-cs	precentral gyrus, left, bank of the central sulcus	65.8317	51.1165	0.0156161	2.5743	71.5694
3	STG-i	superior temporal gyrus, left, inferior bank of gyrus	78.9973	42.5975	0.0694053	2.52262	70.2069
3	PLP	planum polare, left	68.4566	49.1565	0	2.56579	71.373
3	STG-l	superior temporal gyrus, left, lateral bank of gyrus	67.6136	49.7694	0	2.56972	71.421
3	PoG-sl	postcentral gyrus, left, superior lateral aspect of gyrus	64.0189	52.564	0.021411	2.58202	71.7265
3	PoG-cs	postcentral gyrus, left, bank of the central sulcus	66.7021	50.4495	0.0102749	2.57345	71.5806
3	AnG-s	angular gyrus, left, superior bank of gyrus	62.6825	53.6847	0.0164006	2.59227	72.0053
3	SPL-i	superior parietal lobule, left, inferior bank of gyrus	66.7226	50.434	0.0205434	2.568	71.3797
3	MTG-i	middle temporal gyrus, left, inferior bank of gyrus	67.0585	50.1814	0.0102202	2.56699	71.3859
3	CgGp-s	cingulate gyrus, parietal part, left, superior bank of gyrus	66.5753	50.5456	0	2.5695	71.4408
3	Pcu-s	precuneus, left, superior lateral bank of gyrus	69.4983	48.4197	0.00493072	2.55831	71.1345
3	AnG-s	angular gyrus, left, superior bank of gyrus	64.8242	51.911	0.00528625	2.57743	71.592
3	SPL-i	superior parietal lobule, left, inferior bank of gyrus	69.2413	48.5994	0.0247451	2.55793	71.1218
3	OTG-i	occipito-temporal gyrus, left, inferior bank of gyrus	61.5893	54.6319	0.0055639	2.59132	71.9841
3	LiG-pest	lingual gyrus, left, peristriate	67.175	50.0944	0.0255063	2.56499	71.3135
3	Cun-pest	cuneus, left, peristriate	66.7809	50.39	0.0307882	2.57544	71.5882
3	OTG-s	occipito-temporal gyrus, left, superior bank of gyrus	65.5404	51.3437	0.010457	2.57796	71.5991
3	Pcu-i	precuneus, left, inferior lateral bank of gyrus	67.4217	49.9111	0.025413	2.56991	71.4309
3	Pcu-i	precuneus, left, inferior lateral bank of gyrus	65.842	51.1086	0.0520454	2.57697	71.6048
3	Pcu-s	precuneus, left, superior lateral bank of gyrus	71.7429	46.9049	0	2.54885	70.9342
3	Cun-pest	cuneus, left, peristriate	65.2971	51.535	0.0314878	2.57259	71.5517
3	LiG-str	lingual gyrus, left, striate	66.356	50.7127	0.00516422	2.57537	71.5926
3	LiG-pest	lingual gyrus, left, peristriate	68.8472	48.8776	0.0149321	2.55669	71.1339
3	Cun-str	cuneus, left, striate	77.2188	43.5786	0.173072	2.52694	70.354
3	Cun-pest	cuneus, left, peristriate	68.0557	49.4461	0.0100705	2.5648	71.3279
3	SOG-s	superior occipital gyrus, left, superior bank of gyrus	67.8569	49.591	0.00504999	2.5653	71.3225
3	IOG-s	inferior occipital gyrus, left, superior bank of gyrus	70.4818	47.7441	0.00972384	2.55235	71.0189
3	PrG-il	precentral gyrus, left, inferior lateral aspect of gyrus	68.4532	49.159	0.010012	2.55988	71.2094
3	CgGf-i	cingulate gyrus, frontal part, left, inferior bank of gyrus	64.3753	52.273	0.00532311	2.58493	71.8463
3	CgGf-s	cingulate gyrus, frontal part, left, superior bank of gyrus	67.8226	49.616	0.0202102	2.56801	71.4042
3	SFG-m	superior frontal gyrus, left, medial bank of gyrus	71.2186	47.2502	0.0192465	2.54999	70.9426
3	MFG-i	middle frontal gyrus, left, inferior bank of gyrus	67.5382	49.825	0	2.57157	71.4883
3	MFG-s	middle frontal gyrus, left, superior bank of gyrus	71.808	46.8623	0.0286328	2.55106	70.9963
3	TP-m	temporal pole, left, medial aspect	65.4753	51.3948	0.0628042	2.57492	71.5519
3	TP-i	temporal pole, left, inferior aspect	68.8541	48.8727	0.0248843	2.56241	71.2493
3	TP-s	temporal pole, left, superior aspect	66.332	50.731	0.0103322	2.57696	71.6062
3	CgGf-i	cingulate gyrus, frontal part, left, inferior bank of gyrus	60.0644	56.0246	0.0114103	2.59891	72.1807
3	CgGf-i	cingulate gyrus, frontal part, left, inferior bank of gyrus	66.7363	50.4236	0	2.5761	71.6077
3	trIFG	inferior frontal gyrus, triangular part, left	71.8285	46.8489	0.00954153	2.5526	71.0218
3	GRe	gyrus rectus, left	72.9902	46.1033	0.00469484	2.54813	70.9065
3	SFG-l	superior frontal gyrus, left, lateral bank of gyrus	67.2195	50.0612	0.0713703	2.57311	71.5191
3	MFG-s	middle frontal gyrus, left, superior bank of gyrus	68.9809	48.7829	0.00993542	2.56436	71.2815
3	MOrG	medial orbital gyrus, left	65.6843	51.2312	0.0260851	2.57446	71.6025
3	MOrG	medial orbital gyrus, left	72.6407	46.3251	0.00943485	2.54793	70.8837
3	Sp5	spinal trigeminal nucleus, left	57.1928	58.8256	0.0179748	2.59963	72.1892
3	Sp5	spinal trigeminal nucleus, left	45.7508	73.2529	0	2.62351	72.5518
3	GiRt	gigantocellular group, left	48.4648	69.4124	0	2.62837	72.7458
3	Sp5	spinal trigeminal nucleus, left	45.1306	74.4039	0.00759301	2.62251	72.5457
3	Cu	cuneate nucleus, left	50.0103	67.0892	0	2.61435	72.3805
3	LMRt	lateral medullary reticular group, left	46.491	72.1014	0.0147417	2.62668	72.6632
3	8Ve	vestibular nuclei, left	50.8841	66.1055	0	2.61341	72.401
3	Sp5	spinal trigeminal nucleus, left	47.2243	71.1922	0.00725637	2.6269	72.6939
3	RaM	raphe nuclei of medulla	58.0255	57.9933	0.0118113	2.59091	71.9496
3	GiRt	gigantocellular group, left	55.5	60.6261	0	2.61543	72.5144
3	IO	inferior olivary complex, left	58.0118	58.007	0.0354421	2.60572	72.2928
3	Arc	arcuate nucleus of medulla, left	51.357	65.5168	0.0400347	2.61601	72.4804
3	IO	inferior olivary complex, left	49.438	67.9767	0.0277258	2.62812	72.736
3	RaM	raphe nuclei of medulla	59.523	56.5343	0.0172712	2.59959	72.2211
3	Arc	arcuate nucleus of medulla, left	57.0077	59.0286	0.00601106	2.59473	72.0596
3	Pn	pontine nuclei, left	62.2267	54.0779	0.0110138	2.5826	71.6901
3	8Ve	vestibular nuclei, left	51.4838	65.3488	0.013312	2.61178	72.3878
3	Pn	pontine nuclei, left	60.0987	55.9927	0.0057019	2.58653	71.9049
3	PRF	pontine reticular formation, left	60.3865	55.7258	0	2.58998	71.8897
3	Pn	pontine nuclei, left	53.3445	63.05	0	2.60186	72.1089
3	LPB	lateral parabrachial nucleus, left	60.6573	55.4771	0.0112988	2.59449	71.9748
3	SubCn	subcuneiform nucleus, left	45.7028	73.4948	0.0224938	2.63837	72.9174
3	Pn	pontine nuclei, left	56.8398	59.203	0.241153	2.58405	71.7647
3	SNC	substantia nigra, pars compacta, left	52.1829	64.4865	0.00656685	2.62998	72.8899
3	VTA	ventral tegmental area, left	58.2003	57.8191	0.0235516	2.59625	72.0928
3	Hl	lateral habenular nucleus, left	39.0618	83.288	0.0175454	2.65669	73.2407
3	Hm	medial habenular nucleus, left	69.6251	48.3315	0.0492174	2.5576	71.1043
3	ZI	zona incerta, left	58.9199	57.1129	0.0174479	2.58631	71.7983
3	SNC	substantia nigra, pars compacta, left	43.2767	76.8549	0.00791828	2.6504	73.1979
3	Sb	subthalamic nucleus, left	55.1367	61.0317	0	2.60826	72.3722
3	ZI	zona incerta, left	65.0744	51.7114	0.0210637	2.5741	71.6182
3	ILr	rostral group of intralaminar nuclei, left	55.9557	60.1384	0.0367444	2.59946	72.1204
3	LTu	lateral tuberal nucleus, left	49.2838	67.8904	0.208594	2.64095	73.0373
3	PeF	perifornical nucleus, left	59.5161	56.5408	0.0115154	2.59523	72.1171
3	VMH	ventromedial hypothalamic nucleus, left	67.4525	49.8882	0	2.56738	71.3621
3	R	reticular nucleus of thalamus, left	62.847	53.5442	0.0218103	2.57519	71.6577
3	DTLv	lateral group of nuclei, left, ventral division	52.9025	63.6093	0	2.61854	72.575
3	nbM	basal nucleus of meynert, left	60.6675	55.4677	0	2.59198	72.0379
3	GPi	globus pallidus, internal segment, left	63.1382	53.2972	0.0325645	2.58359	71.8276
3	GPe	globus pallidus, external segment, left	48.1941	69.6388	0.0142207	2.62003	72.4913
3	SO	supraoptic nucleus, left	66.8666	50.3254	0.0204992	2.57483	71.5167
3	DBh	nucleus of the diagonal band, left, vertical division	53.814	62.5318	0	2.62501	72.7816
3	SptN	septal nuclei, left	58.937	57.0963	0.0232572	2.58856	71.8472
3	Cl	claustrum, left	61.0239	55.1438	0.0280773	2.58807	71.8972
3	DBv	nucleus of the diagonal band, left, horizontal division	57.1859	58.8447	0	2.60536	72.2872
3	LGd	dorsal lateral geniculate nucleus, left	58.9816	57.0532	0.0406693	2.59413	72.0013
3	R	reticular nucleus of thalamus, left	67.9014	49.5584	0.0353268	2.55766	71.1668
3	DTLd	lateral group of nuclei, left, dorsal division	64.6769	52.0292	0.0211932	2.57828	71.6605
3	Pu	putamen, left	57.4532	58.5709	0.00596445	2.59931	72.1853
3	DG	dentate gyrus, left	67.0345	50.1943	0.0511195	2.54819	70.8577
3	CA4	CA4 field, left	52.9059	63.5274	0.064771	2.60292	72.187
3	CA1	CA1 field, left	62.7956	53.588	0.00545703	2.57718	71.6299
3	ATZ	amygdalohippocampal transition zone, left	60.575	55.5524	0.0282853	2.58897	71.9323
3	LA	lateral nucleus, left	63.594	52.9152	0	2.57998	71.7029
3	BLA	basolateral nucleus, left	56.5486	59.5079	0.0545388	2.60564	72.2884
3	Cl	claustrum, left	61.9252	54.3412	0.00553373	2.57777	71.7001
3	MG	medial geniculate complex, left	62.1924	54.1077	0.0440796	2.58082	71.7183
3	LGd	dorsal lateral geniculate nucleus, left	51.3536	65.4277	0.00667289	2.60854	72.2601
3	CPLV	choroid plexus of the lateral ventricle	59.194	56.7327	0.0463124	2.59702	72.0144
3	TCd	tail of caudate nucleus, left	60.2152	55.8844	0.00569087	2.59633	72.1163
3	DG	dentate gyrus, left	61.3837	54.653	0.0111651	2.57477	71.5245
3	CA2	CA2 field, left	58.8171	57.1953	0.0524353	2.58502	71.8153
3	CA1	CA1 field, left	60.5236	55.5996	0.045295	2.59761	72.1883
3	Cl	claustrum, left	60.4791	55.6405	0.0169981	2.58895	71.9314
3	IC	inferior colliculus, left	57.1928	58.8376	0	2.60538	72.2873
3	Dt	dentate nucleus, left	58.8685	57.1628	0	2.60986	72.4209
3	Dt	dentate nucleus, left	66.3286	50.7336	0.0103327	2.57628	71.6037
3	DTP	posterior group of nuclei, left	55.2704	60.8717	0	2.62041	72.6844
3	DTLd	lateral group of nuclei, left, dorsal division	60.9931	55.1716	0	2.59495	72.0534
3	VTA	ventral tegmental area, left	58.1728	57.8464	0	2.60173	72.2379
3	RN	red nucleus, left	62.9429	53.4625	0.0272213	2.5873	71.9241
3	Sb	subthalamic nucleus, left	58.4127	57.6088	0	2.60469	72.3086
3	R	reticular nucleus of thalamus, left	61.5414	54.6801	0.0389777	2.58958	71.9411
3	ILc	caudal group of intralaminar nuclei, left	59.0638	56.9738	0.0116036	2.59606	72.1498
3	ILr	rostral group of intralaminar nuclei, left	66.8494	50.3383	0.0410088	2.56798	71.4311
3	DTLv	lateral group of nuclei, left, ventral division	64.1834	52.4293	0.0587293	2.57725	71.6514
3	DTM	medial group of nuclei, left	59.242	56.8024	0.00578436	2.6031	72.342
3	DTA	anterior group of nuclei, left	64.9681	51.796	0.105491	2.57699	71.6341
3	BCd	body of caudate nucleus, left	57.7925	58.2212	0.0177883	2.60492	72.3069
3	SNR	substantia nigra, pars reticulata, left	57.4121	58.6129	0.0417811	2.61694	72.5942
3	SuM	supramammillary nucleus, left	61.5002	54.7167	0.0167159	2.59189	72.019
3	PHA	posterior hypothalamic area, left	59.1255	56.9143	0.0173873	2.60603	72.3328
3	LM	lateral mammillary nucleus, left	66.541	50.5716	0.036049	2.57278	71.5095
3	LHM	lateral hypothalamic area, mammillary region, left	61.7367	54.5071	0	2.58865	71.8931
3	MM	medial mammillary nucleus, left	60.7464	55.3957	0.0225644	2.60057	72.2139
3	DTA	anterior group of nuclei, left	63.5152	52.9808	0.0215808	2.57815	71.7044
[truncated: 1,703 more rows]
